# Supplementary material
Source: MDPI journal article supplement (https://www.mdpi.com/1424-8247/15/11/1335)
Supplement: s1 [file s1]

## Supporting Information

For

# Ligand growing experiments suggested 4-amino and 4-ureido pyridazin-3(2*H*)-one as novel scaffold for FABP4 inhibition

Letizia Crocetti <sup>1,\*</sup>, Giuseppe Floresta <sup>2</sup>, Chiara Zagni <sup>2</sup>, Divya Merugu <sup>3</sup>, Francesca Mazzacuva <sup>4</sup>, Renan Rodrigues de Oliveira Silva <sup>3</sup>, Claudia Vergelli <sup>2</sup>, Maria Paola Giovannoni <sup>2</sup>, and Agostino Cilibrizzi <sup>3,5,\*</sup>

<sup>1</sup>Dipartimento NEUROFARBA – Pharmaceutical and Nutraceutical Section, via Ugo Schiff 6, 50019 Sesto Fiorentino (FI), Italia.

<sup>2</sup>Dipartimento di Scienze del Farmaco e della Salute, Università di Catania, Viale A. Doria 6, 95125 Catania, Italy

<sup>3</sup>Institute of Pharmaceutical Science, King's College London, Stamford Street, London, SE1 9NH, UK

<sup>4</sup>School of Health, Sport and Bioscience, University of East London, London, E15 4LZ, UK

<sup>5</sup>Centre for Therapeutic Innovation, University of Bath, Bath, UK

\*Correspondence: L.C., letizia.crocetti@unifi.it, Tel. +39 0554573683; A.C., agostino.cilibrizzi@kcl.ac.uk, +44 (0) 20 7848 9532.

## Table of content

|                                                                        |     |
|------------------------------------------------------------------------|-----|
| 1. <sup>1</sup> H NMRs of selected compounds                           | S2  |
| 2. <sup>13</sup> C NMRs of selected compounds                          | S15 |
| 3. Mass spectra of selected compounds                                  | S27 |
| 4. HPLC/UV chromatograms of selected compounds                         | S40 |
| 5. 50 'best-fit' compounds generated with scaffold hopping replacement | S50 |

# <sup>1</sup>H- NMR

4a

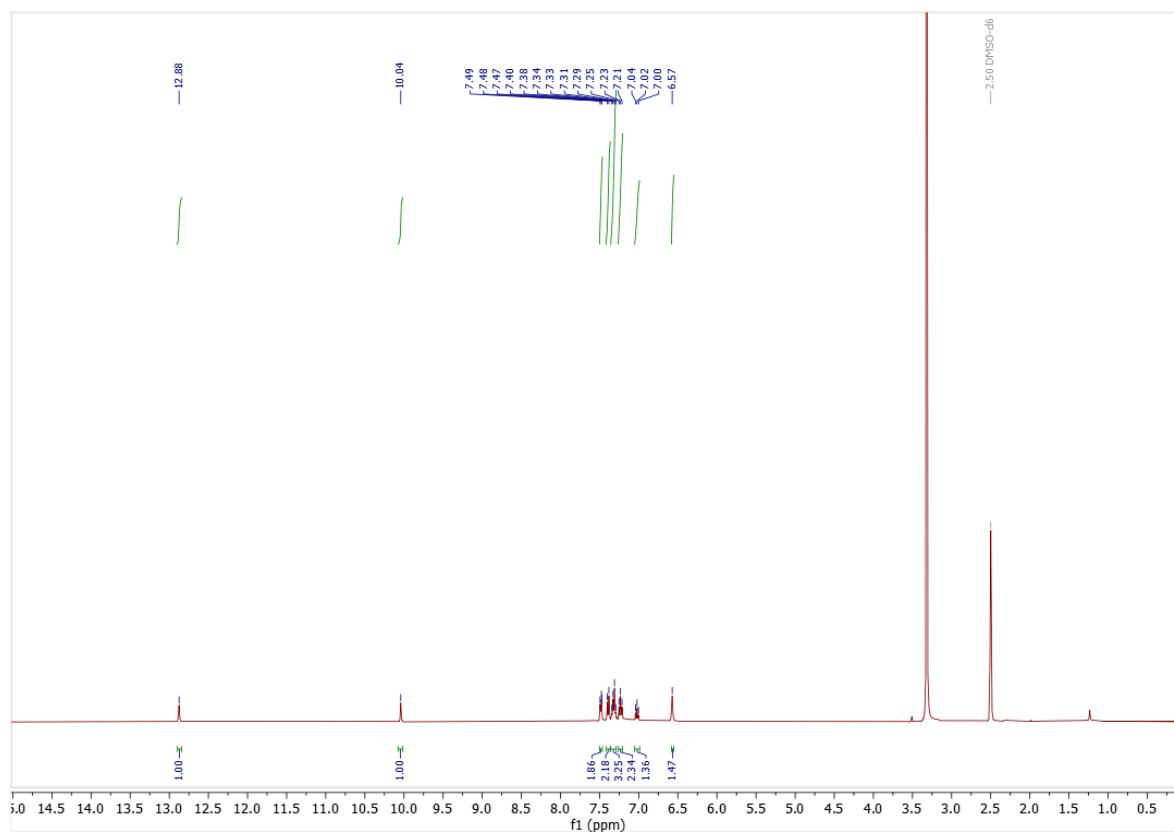

4b

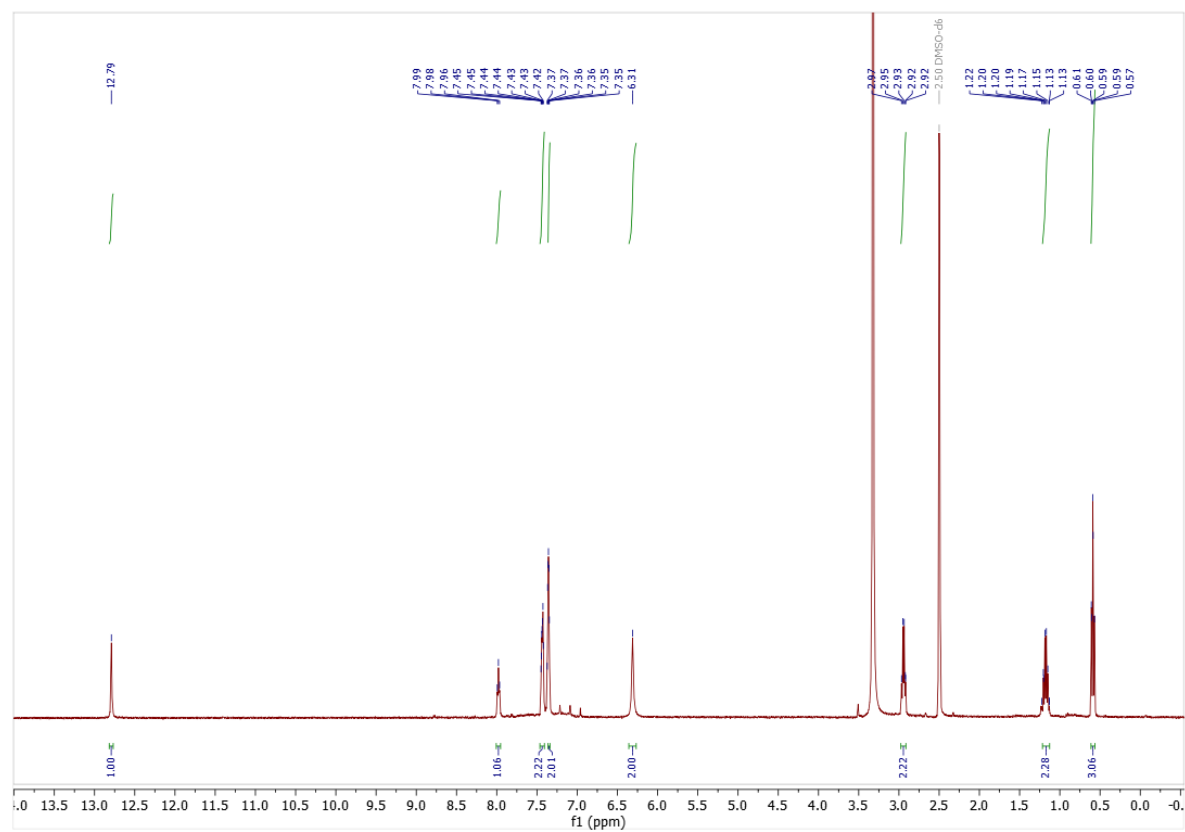

6

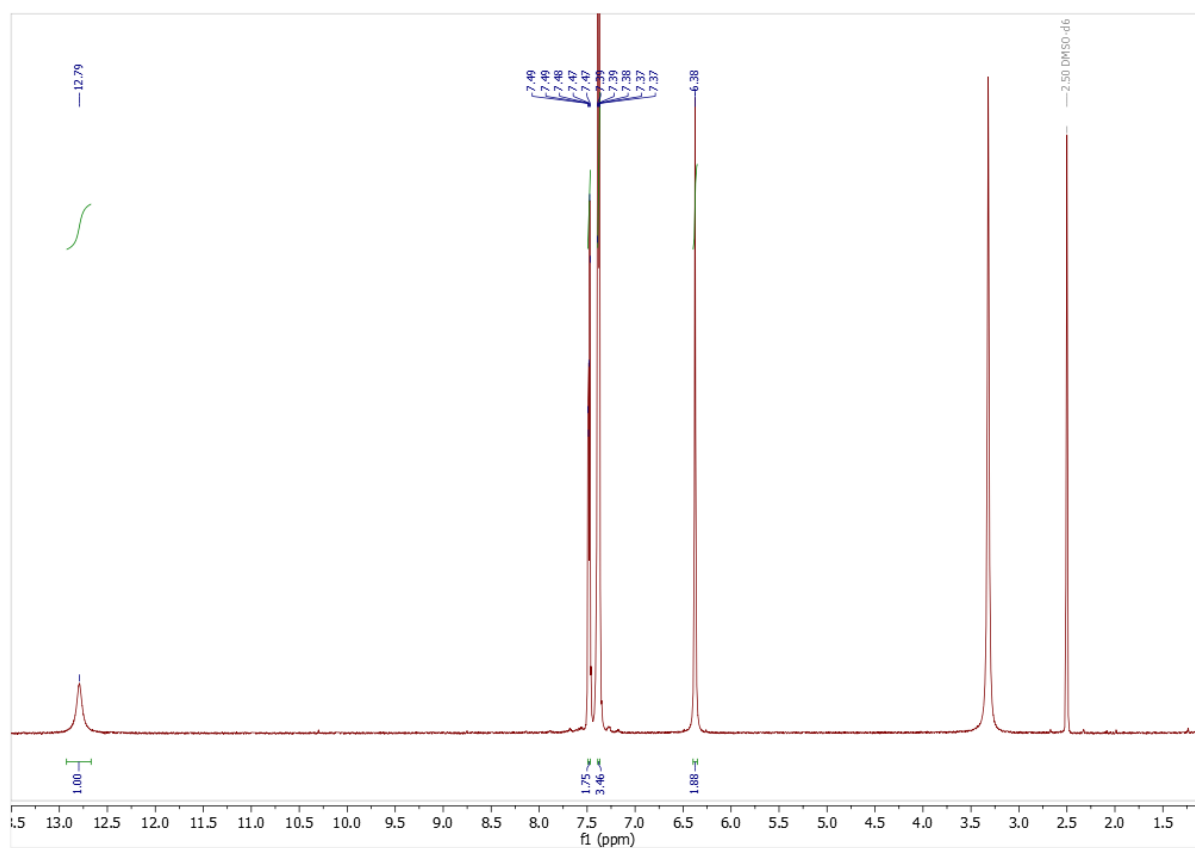

7

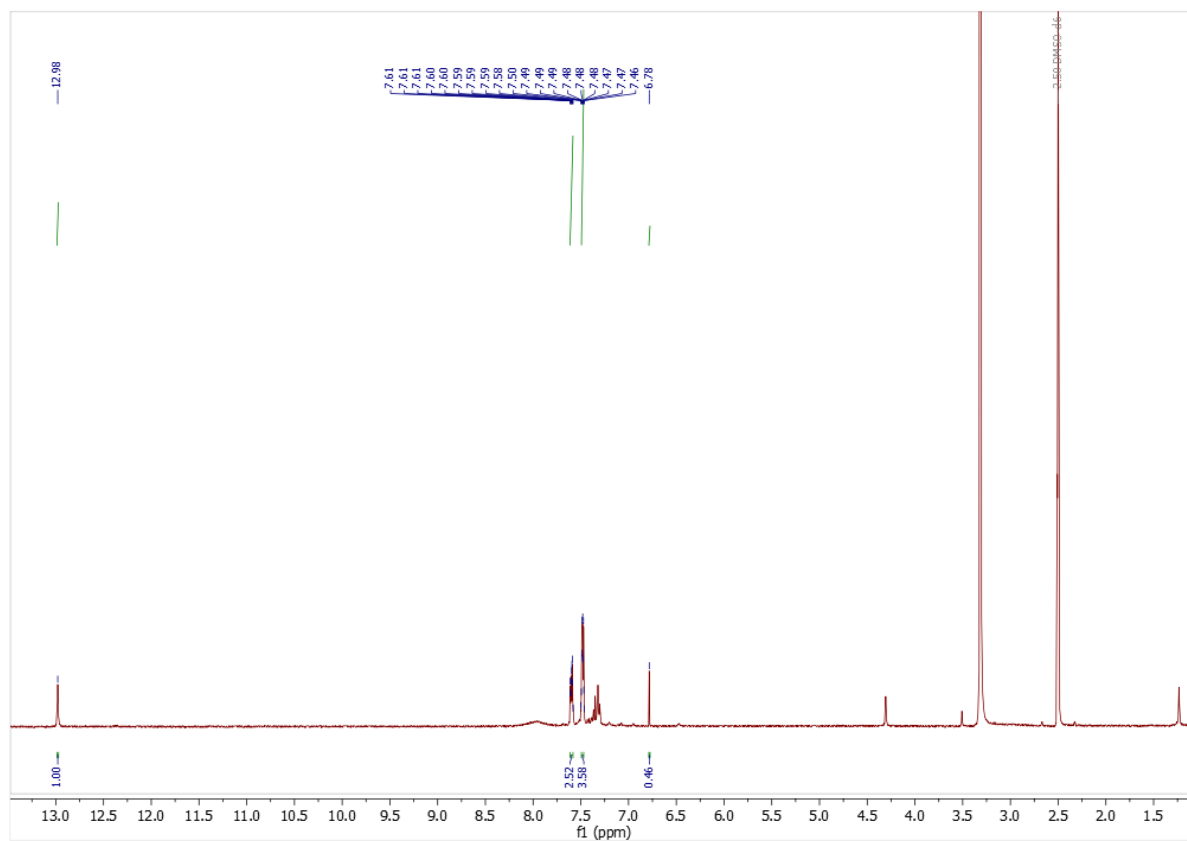

16

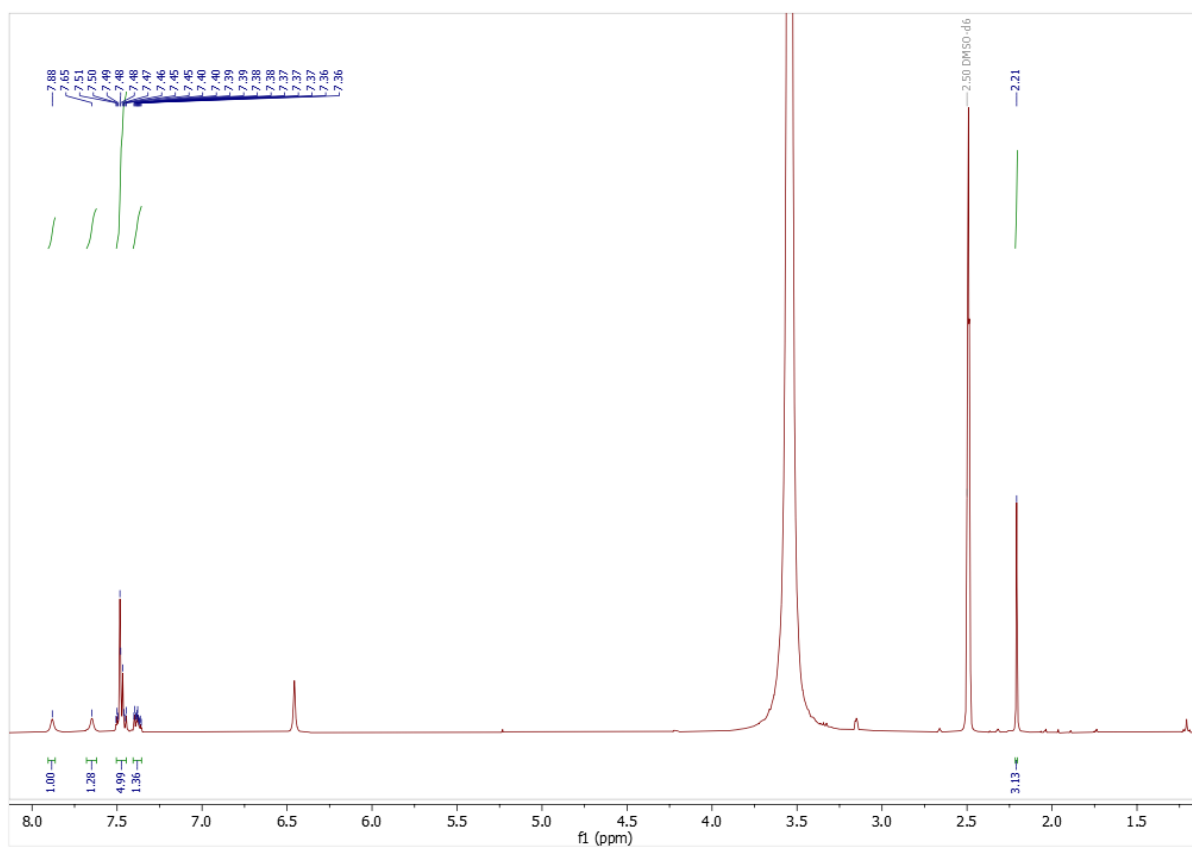

17

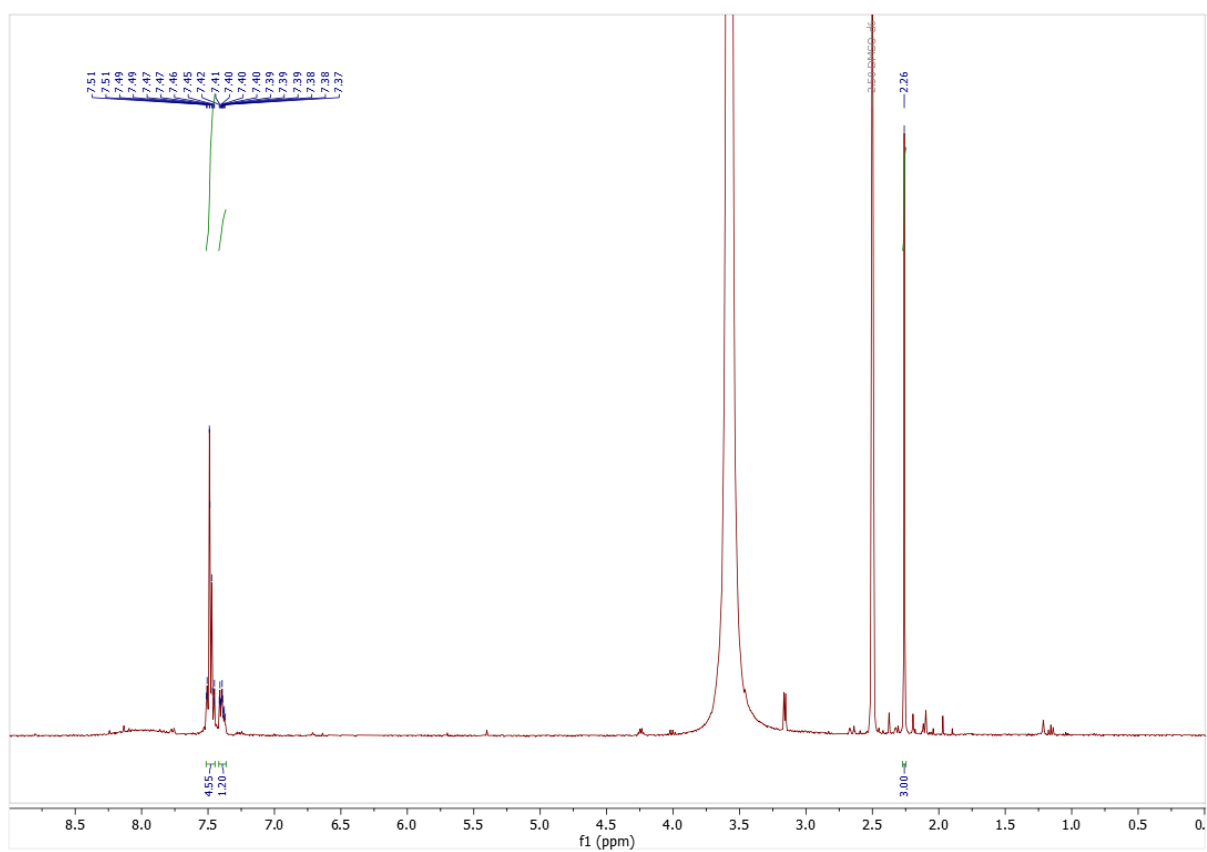

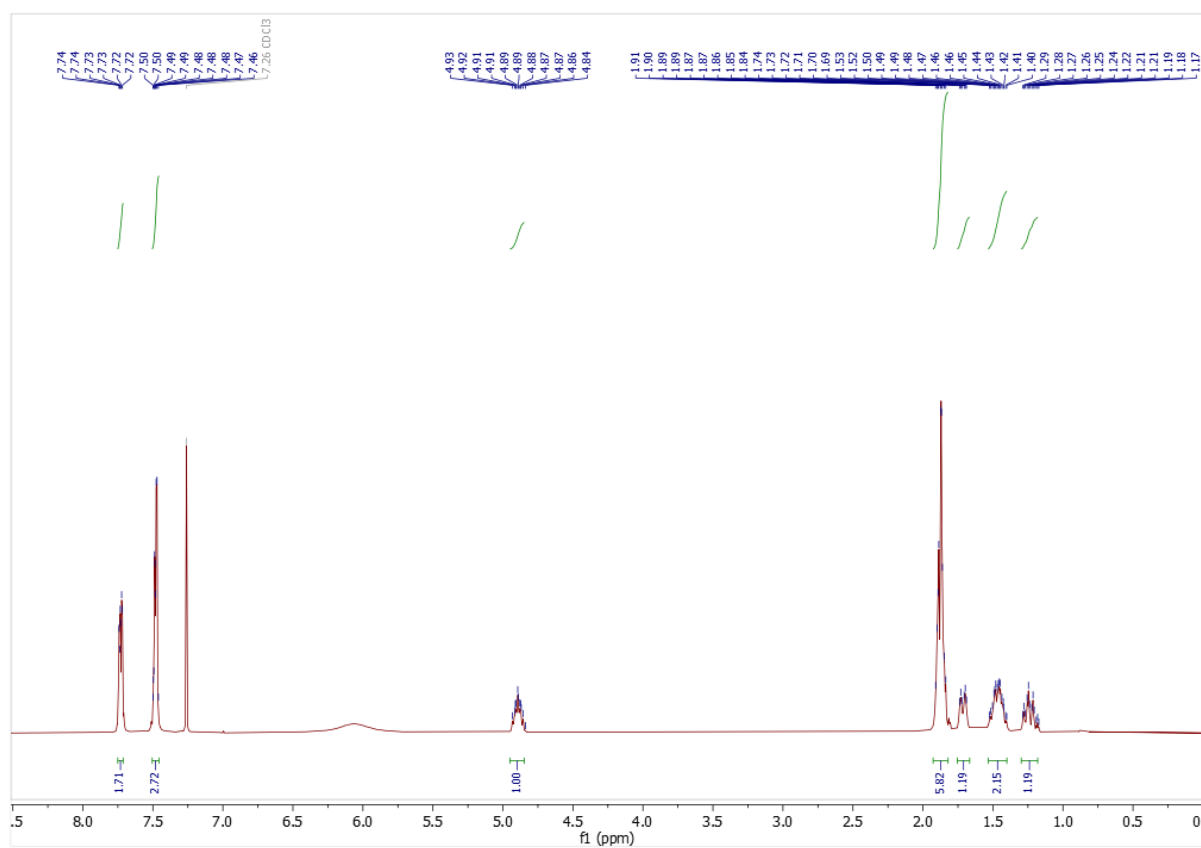

## 25a (EtOAc crossed)

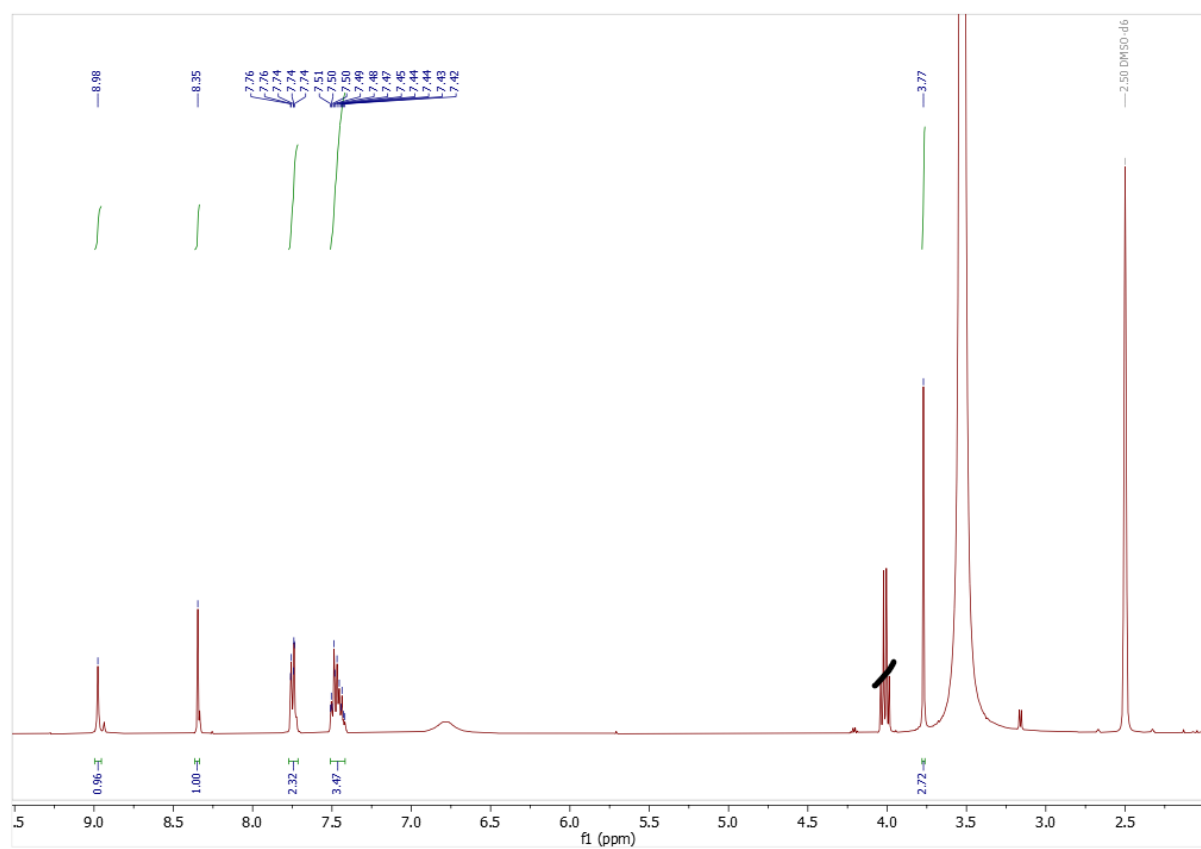

25c

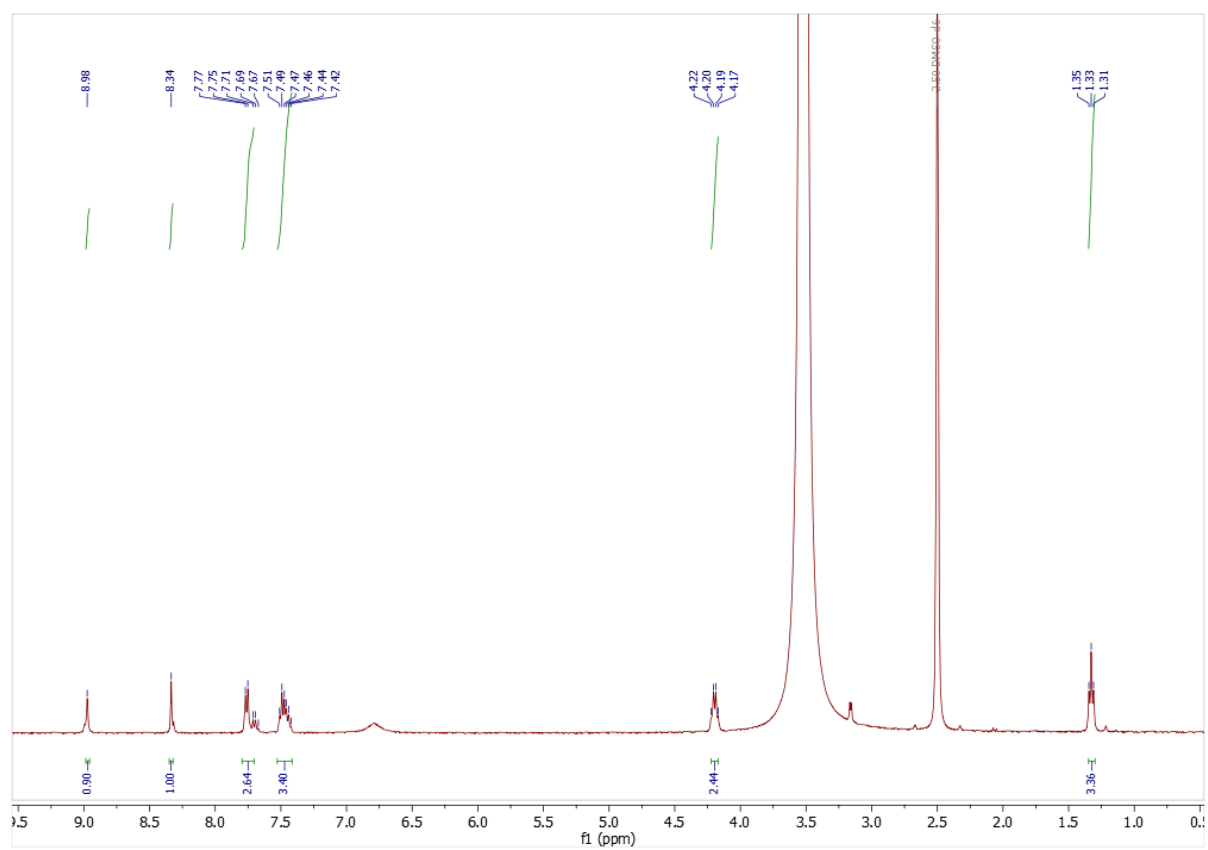

25d

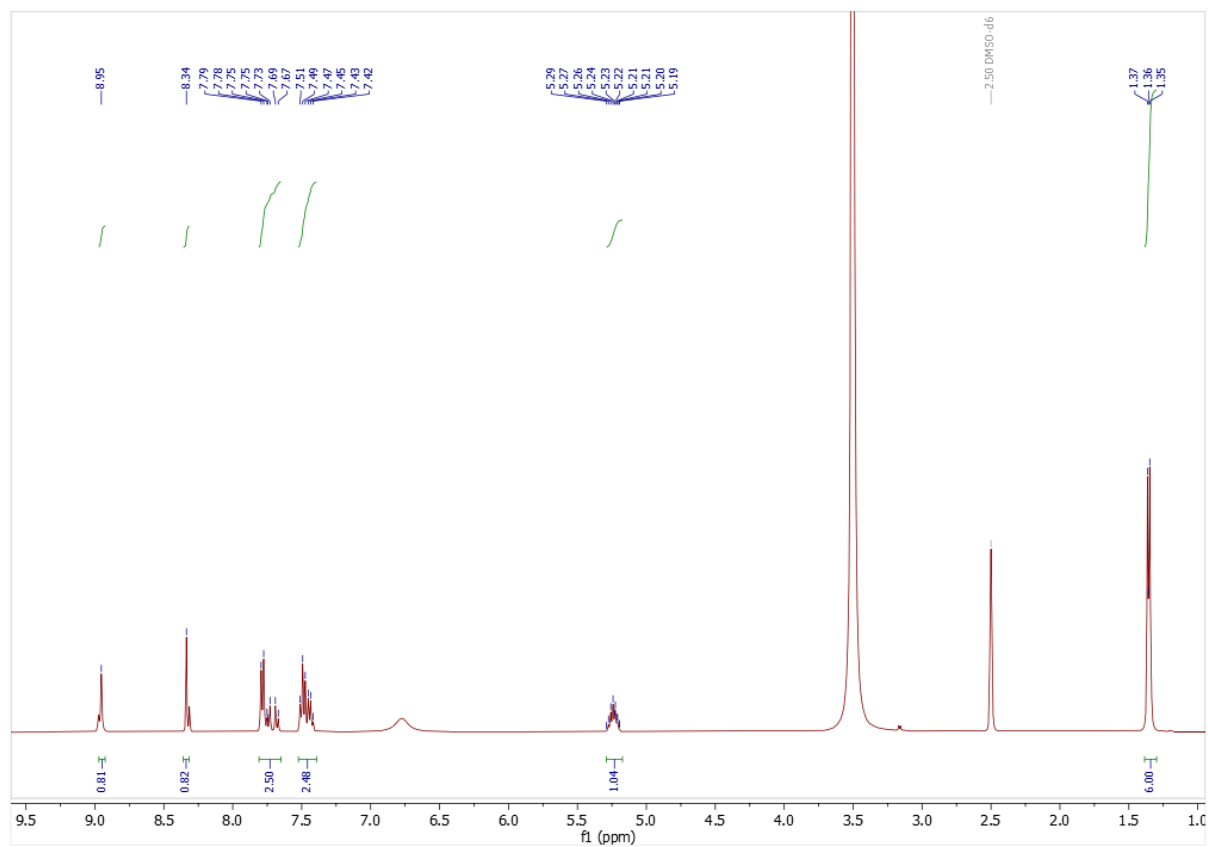

25e

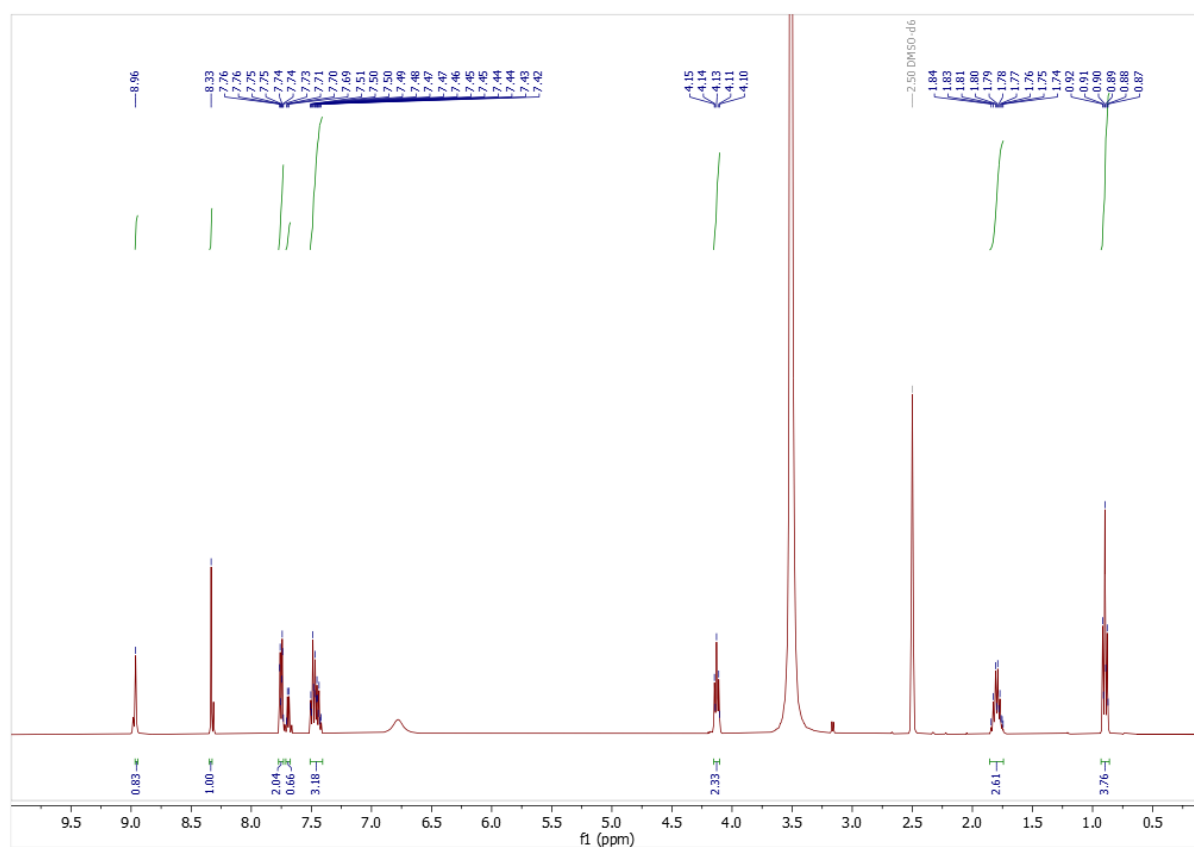

25f

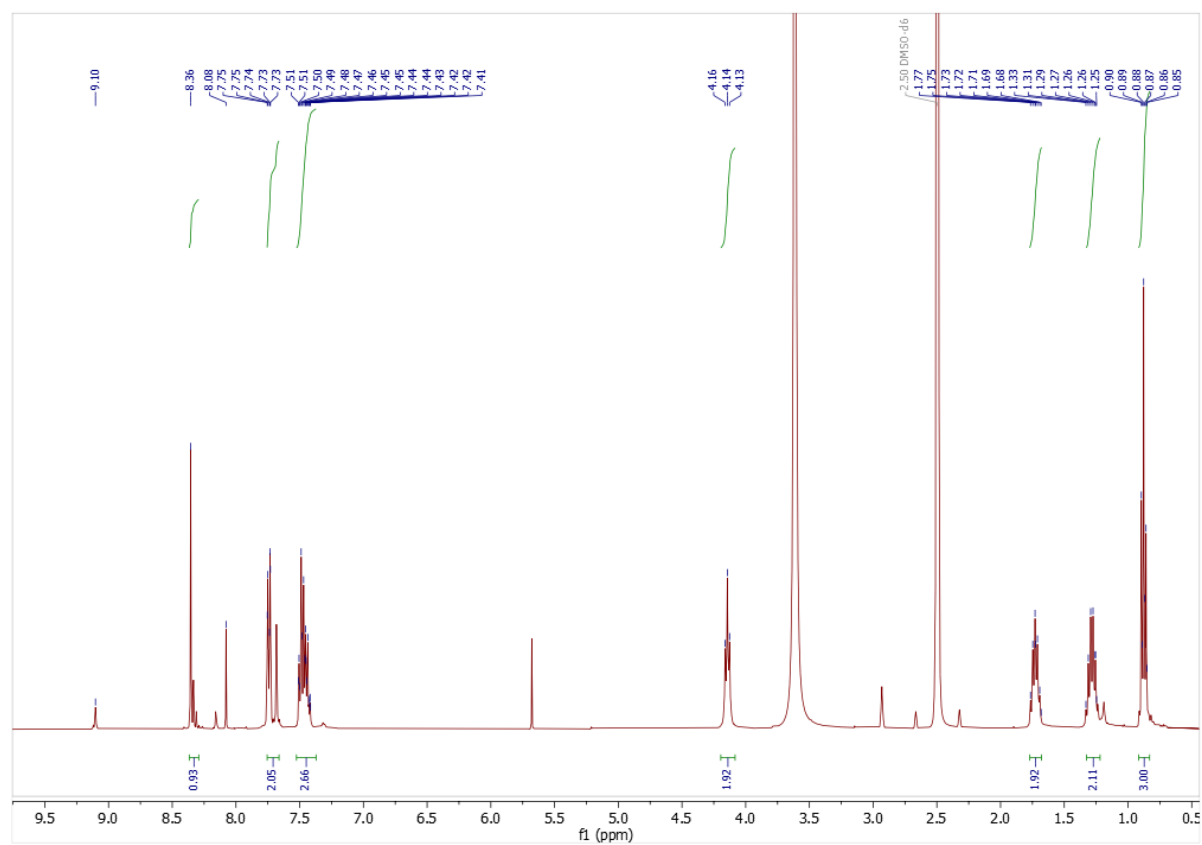

27

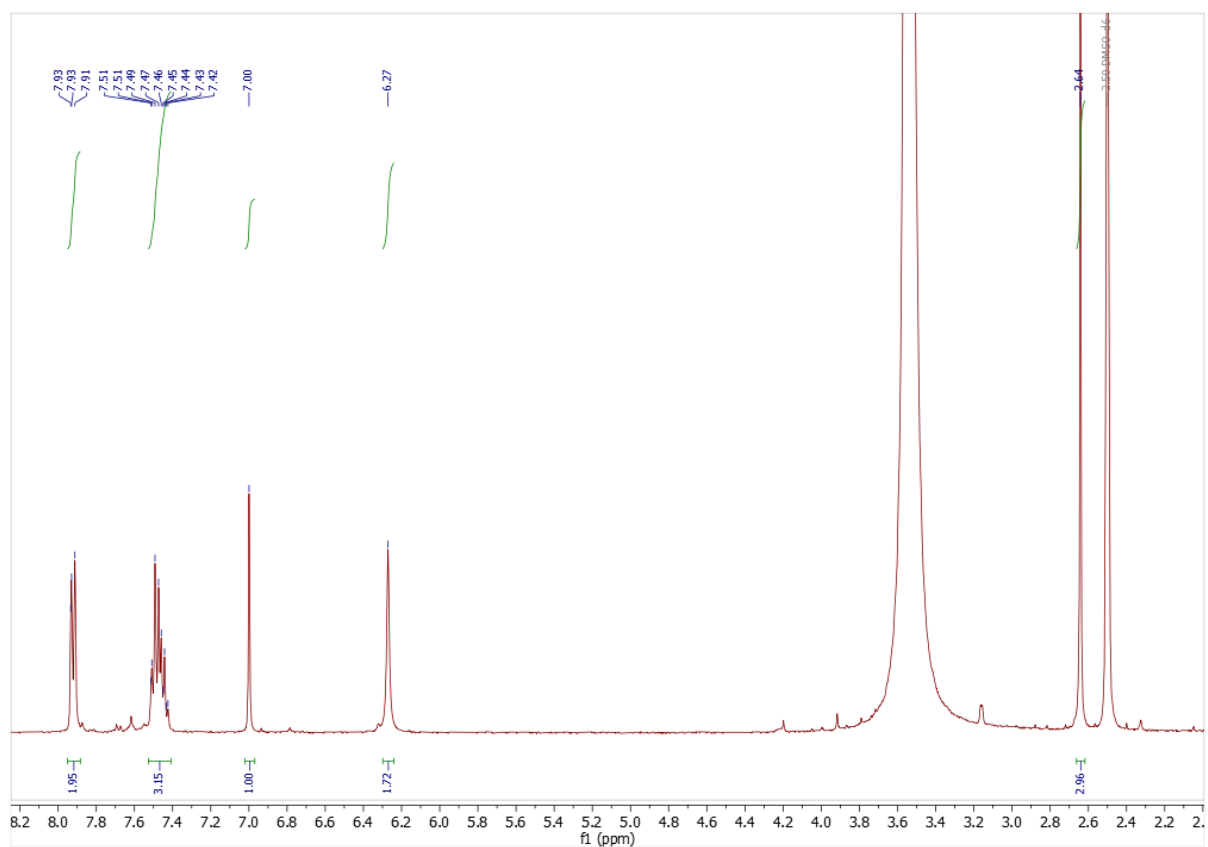

28

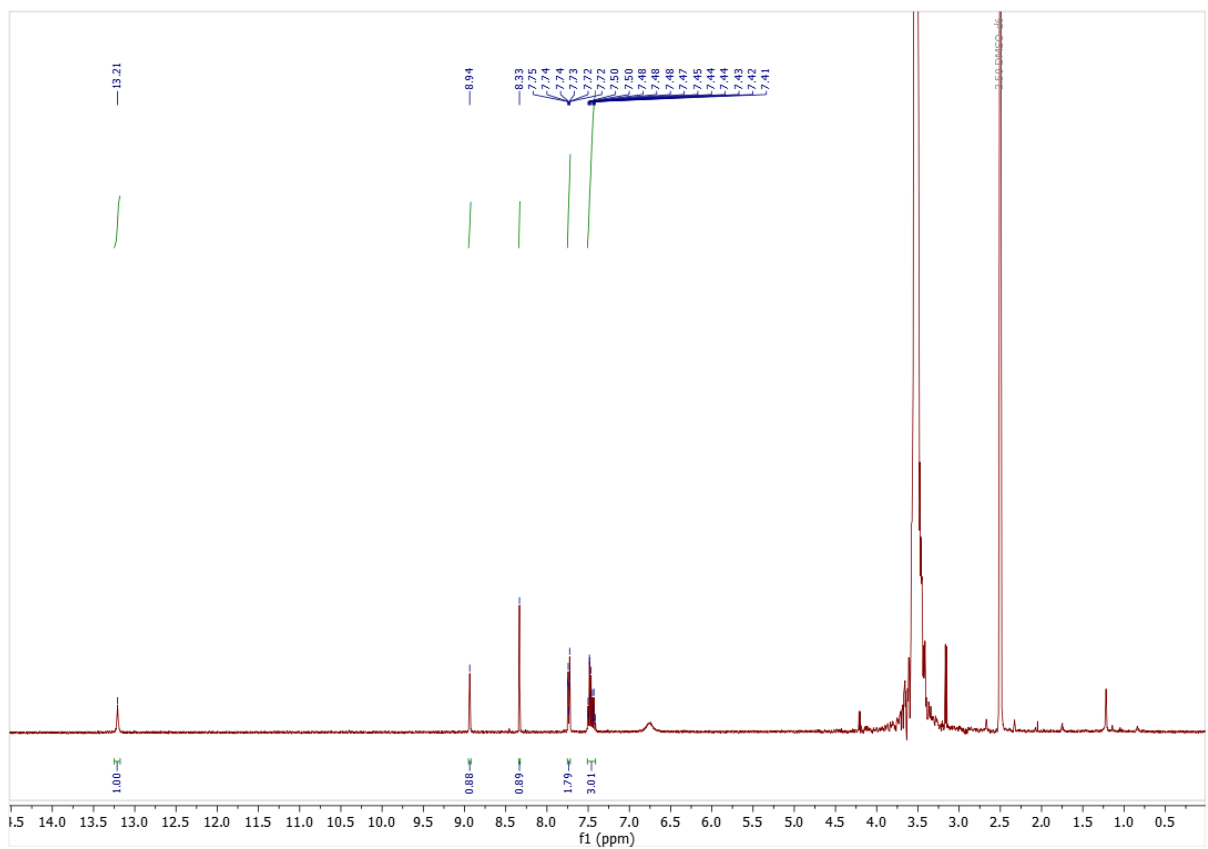



29a

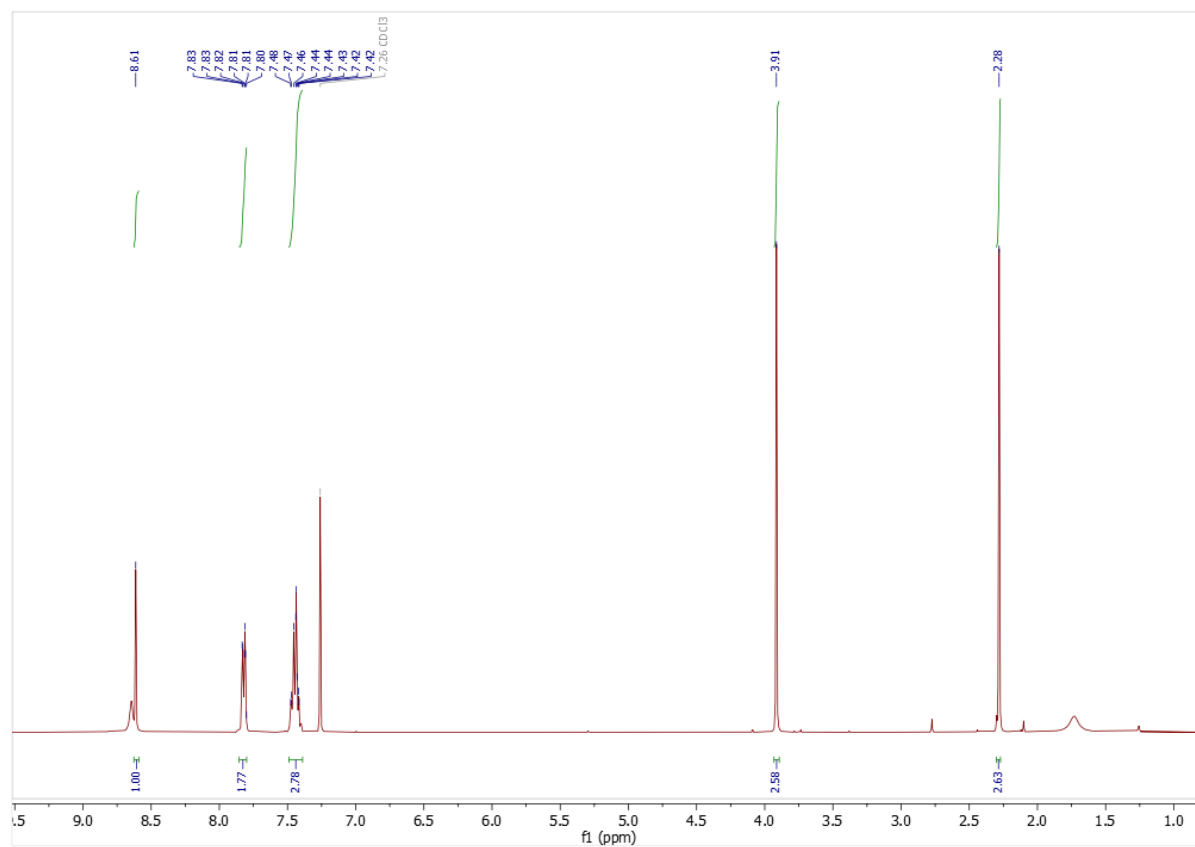

29b

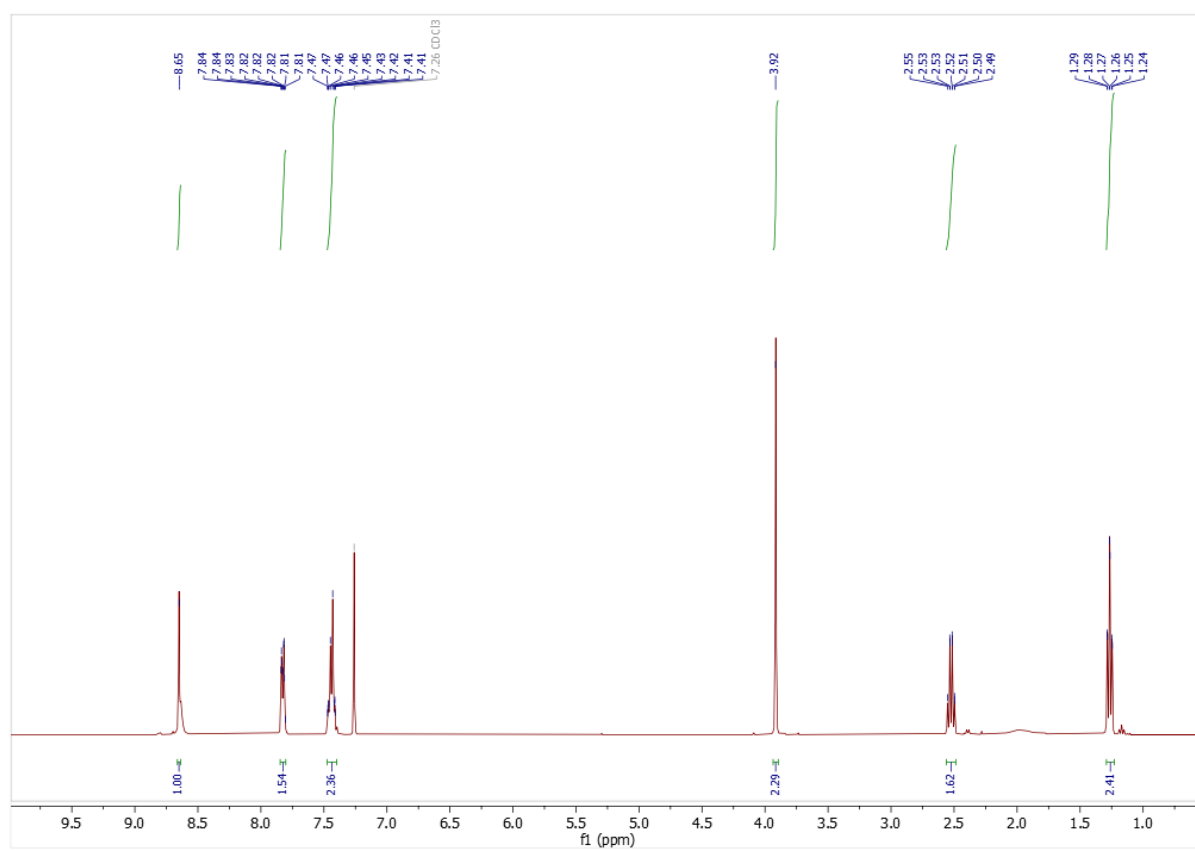

29c

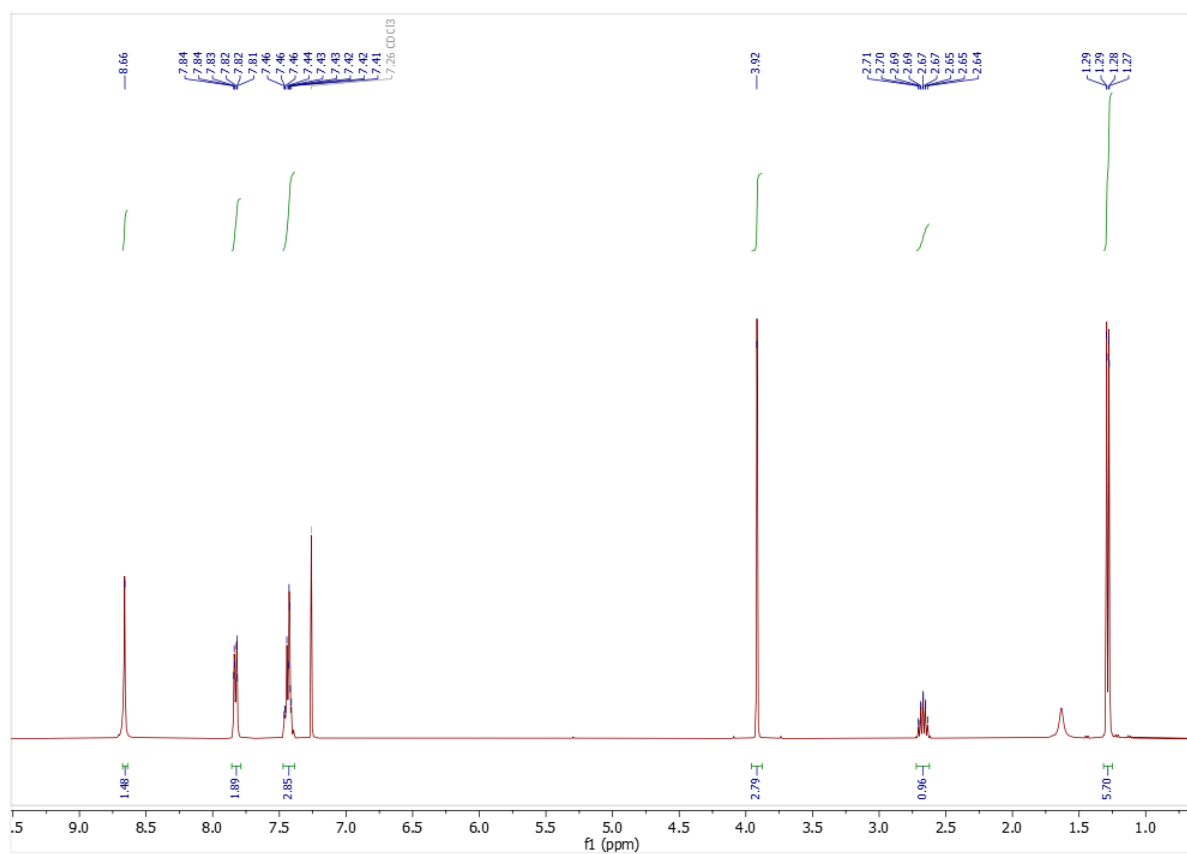

30a

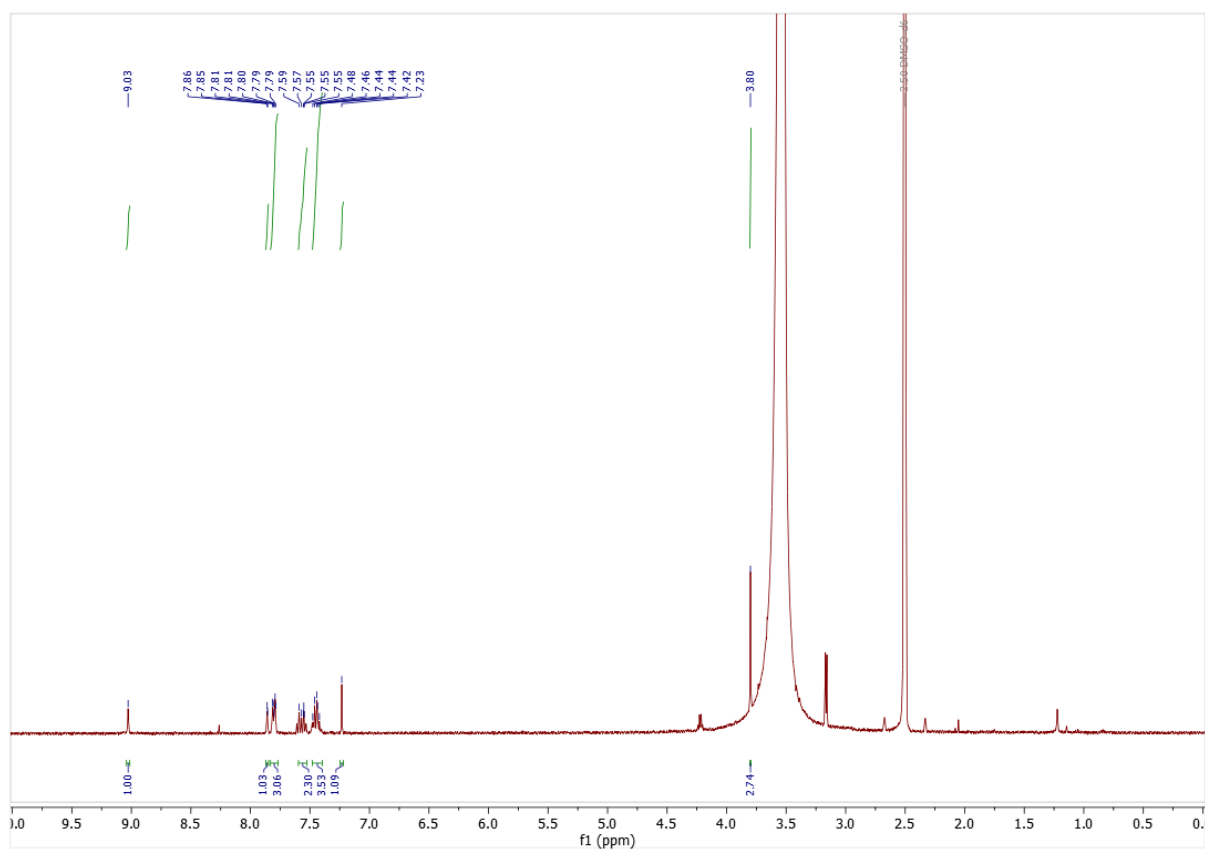

30b

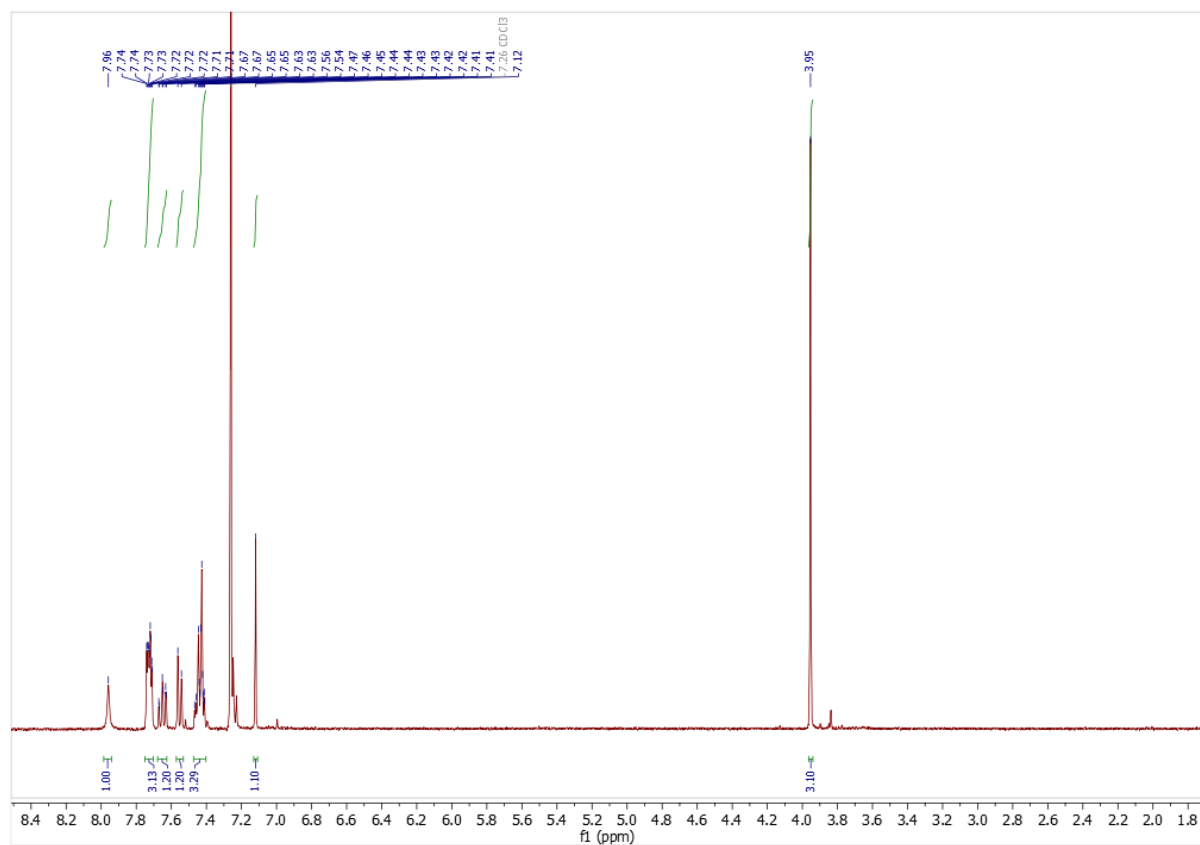

35

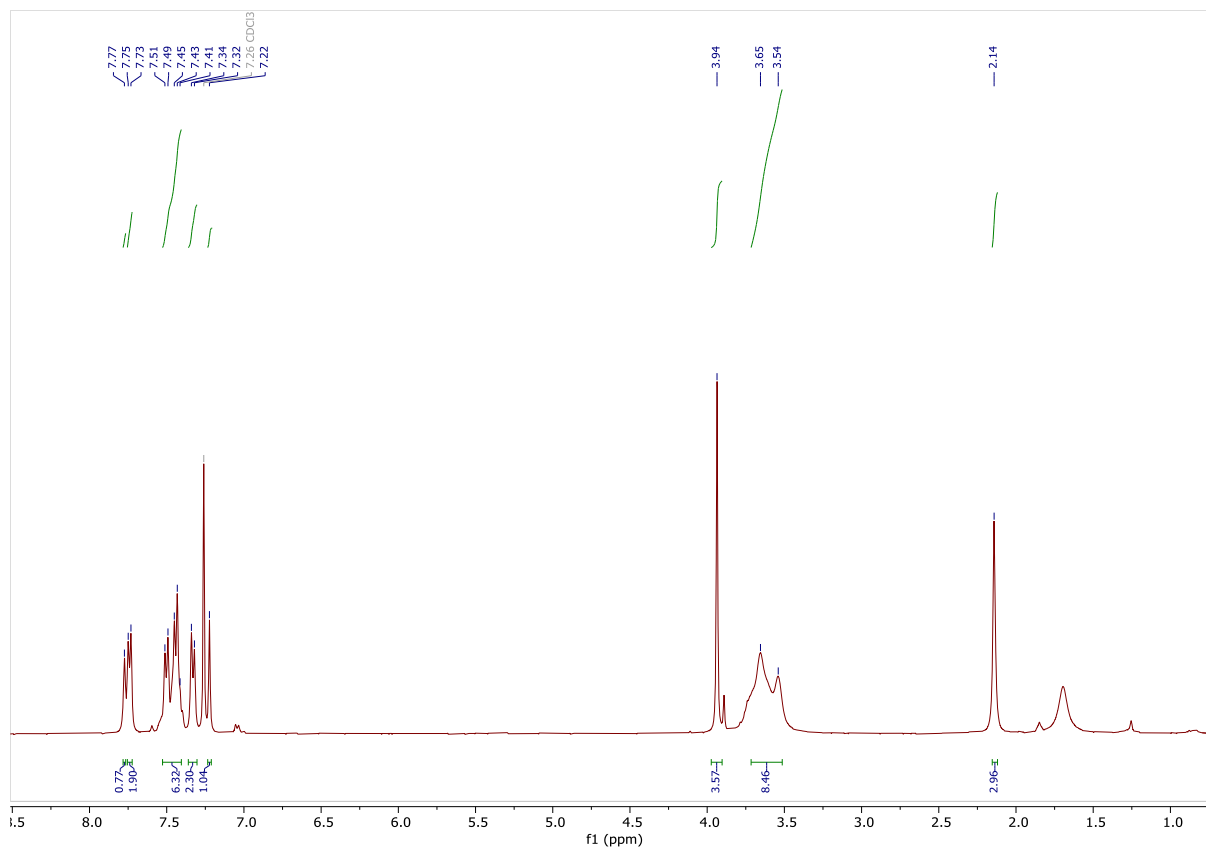

42a

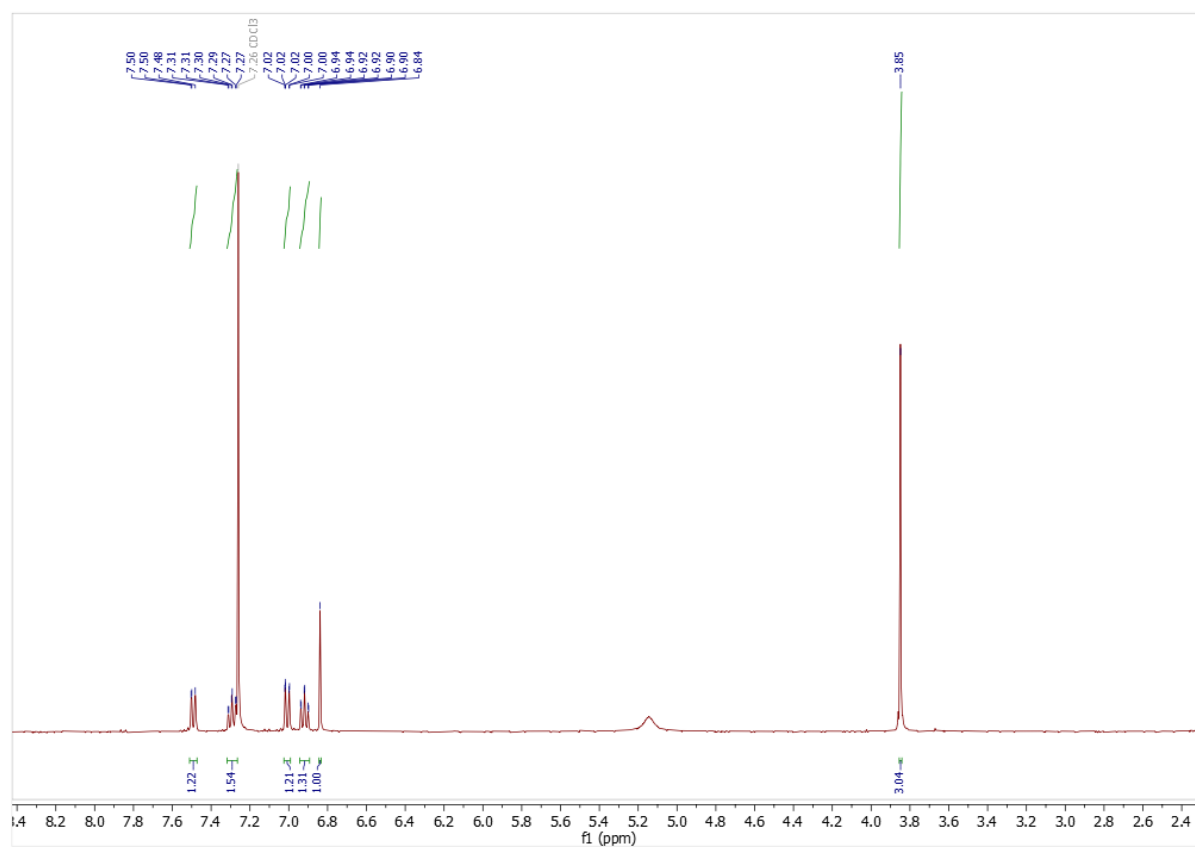

51

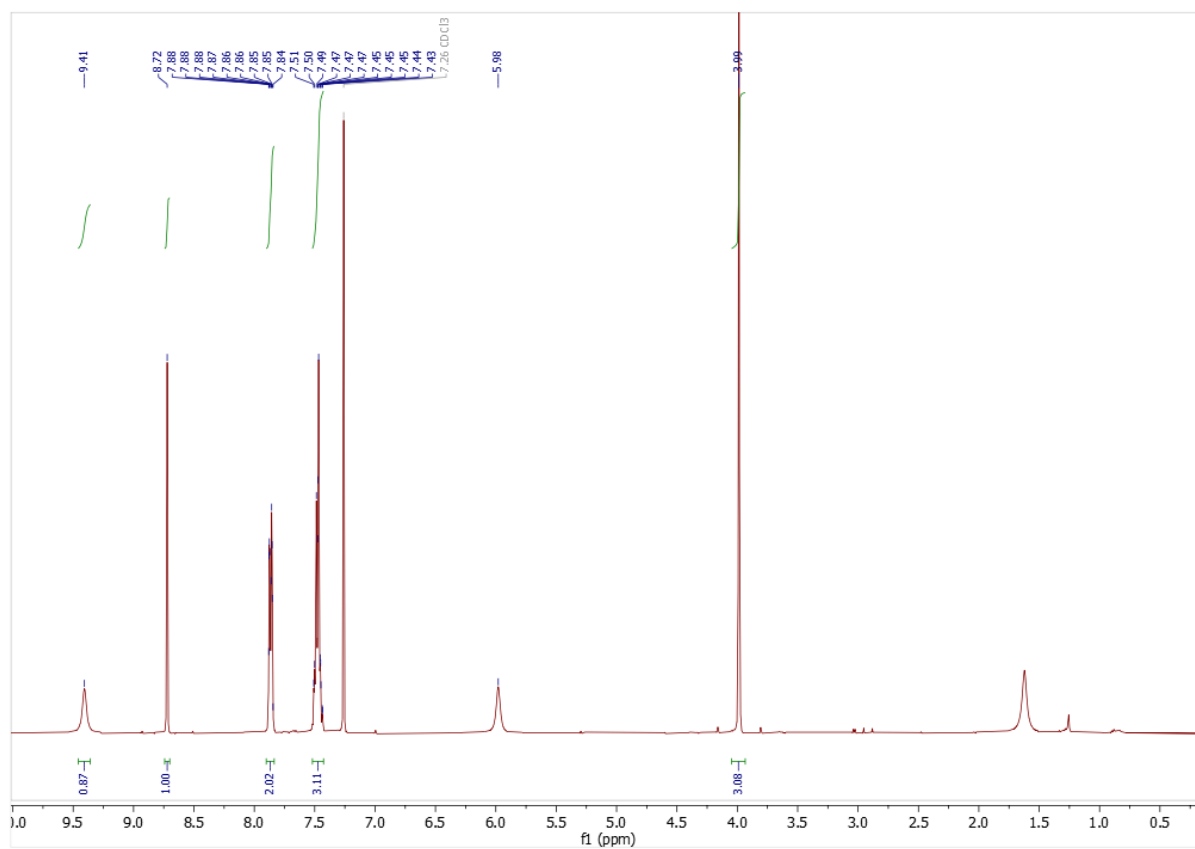

54

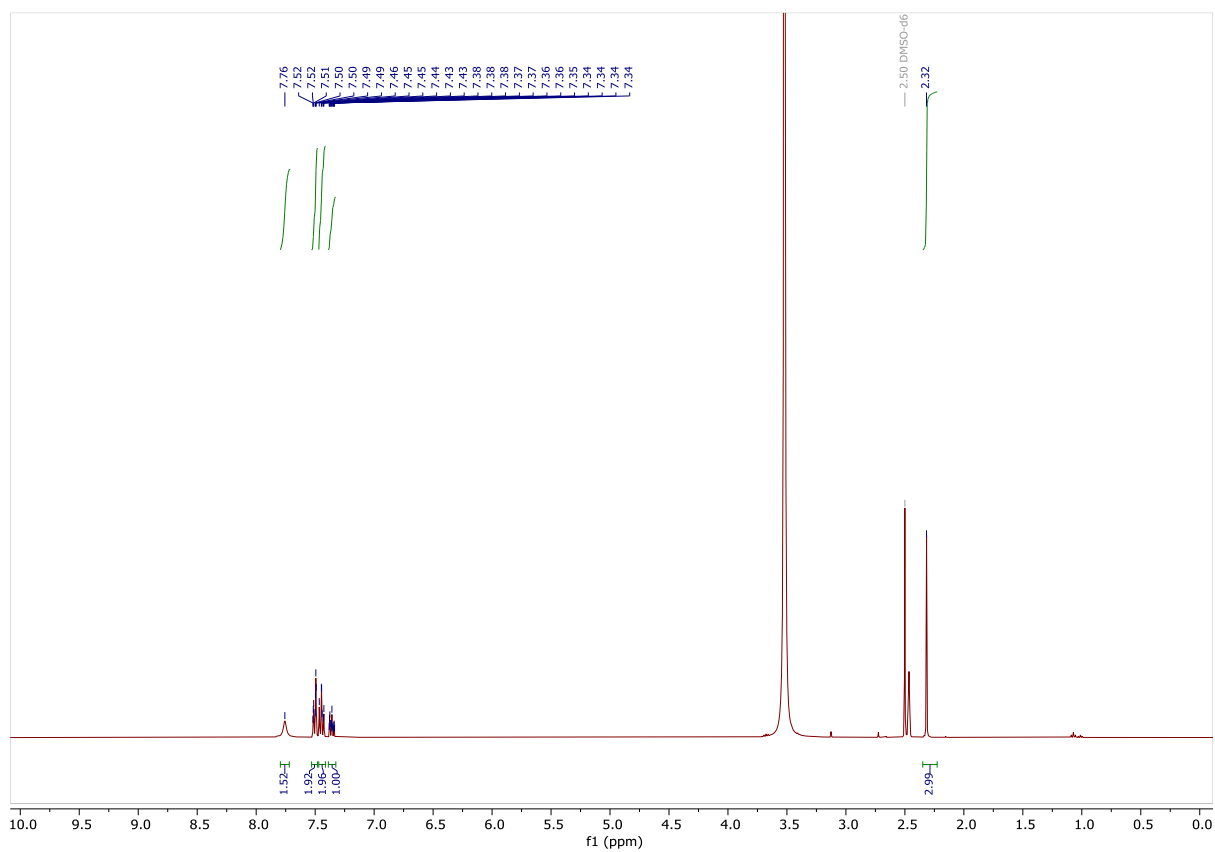

55

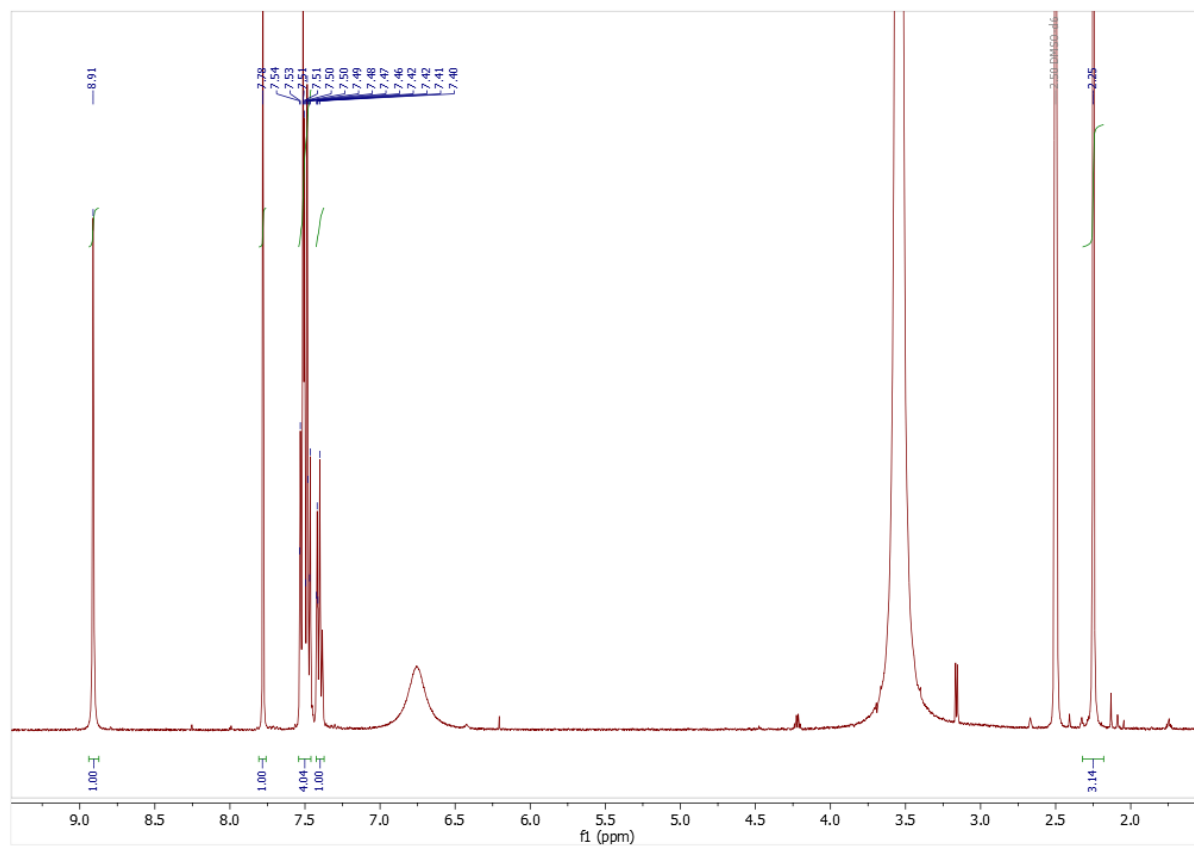

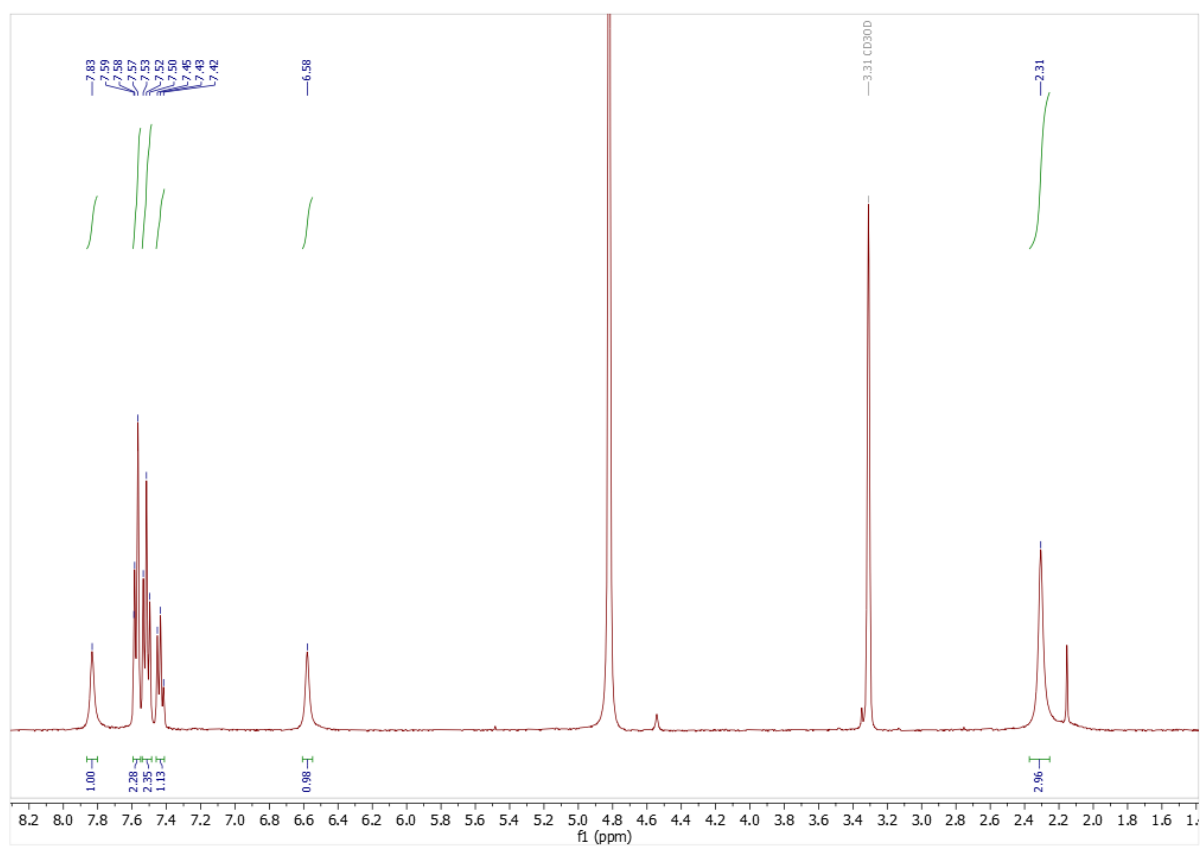

# $^{13}\text{C}$ -NMRs

4a

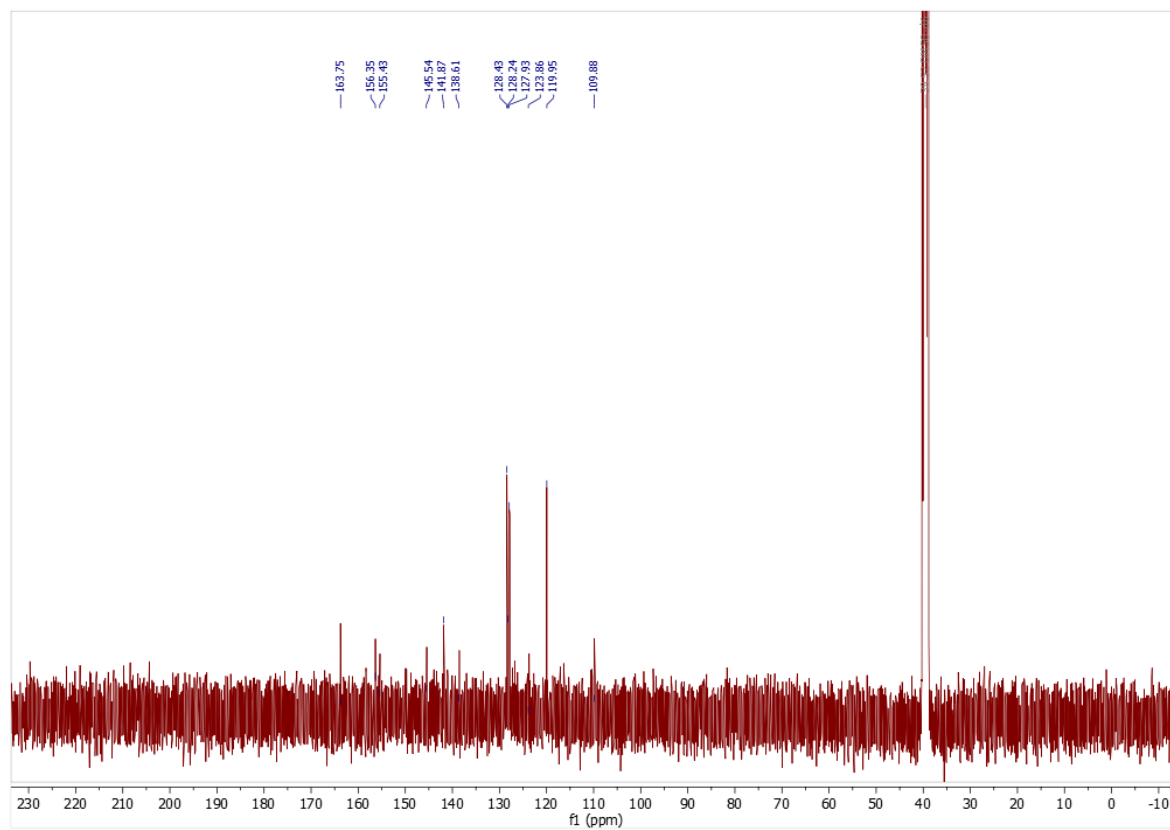

4b

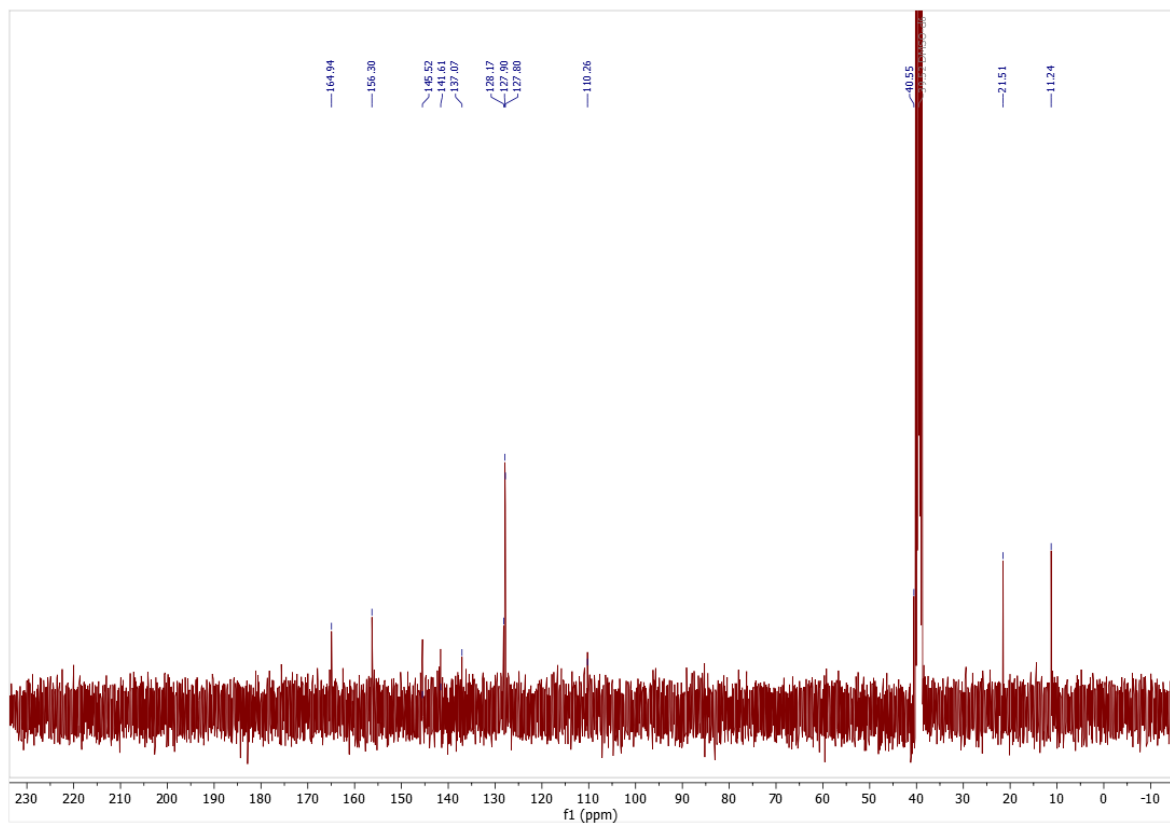

6

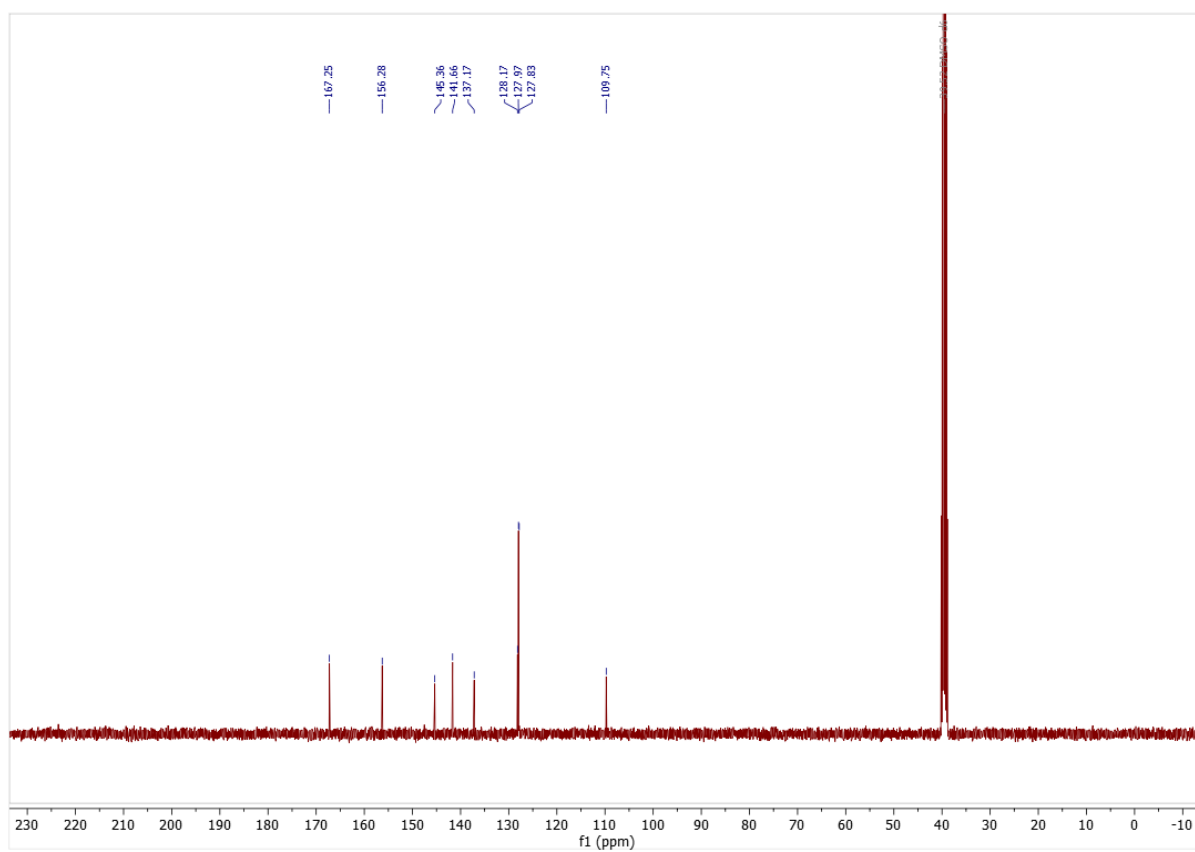

7

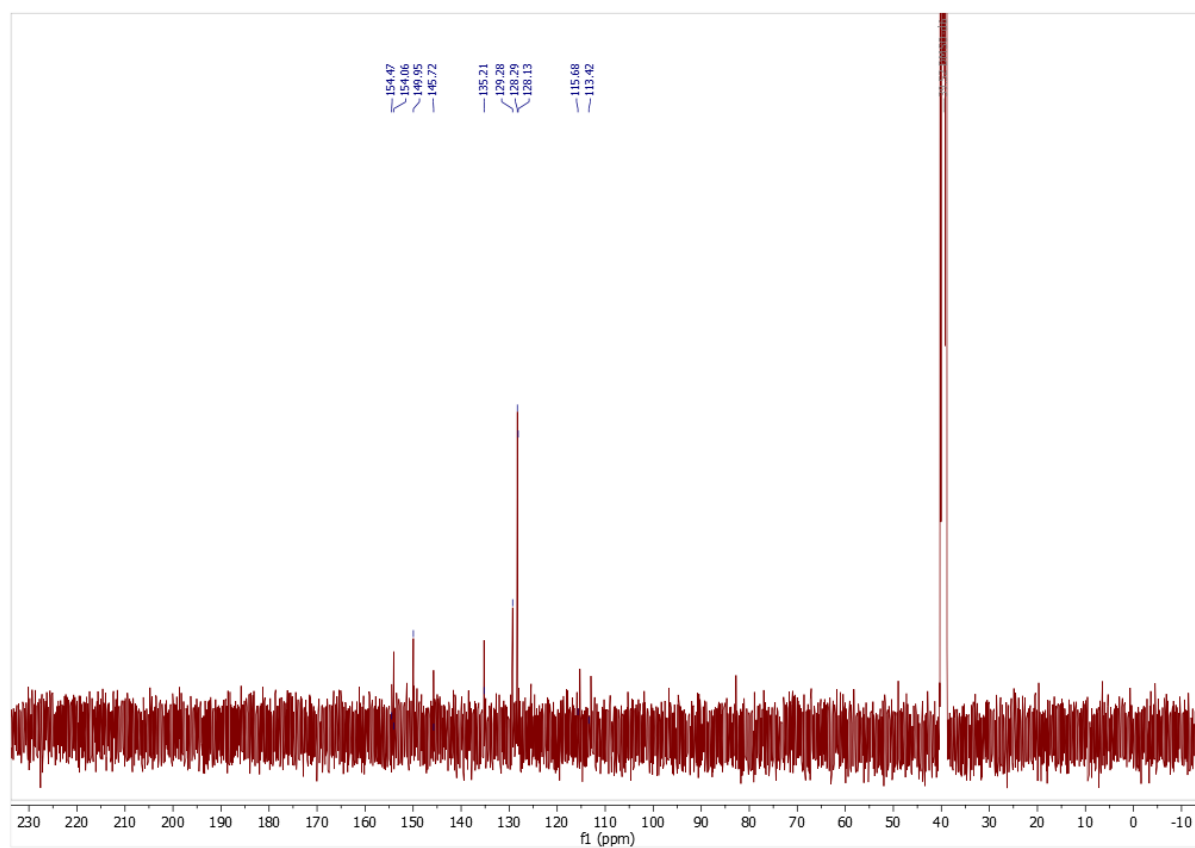



16

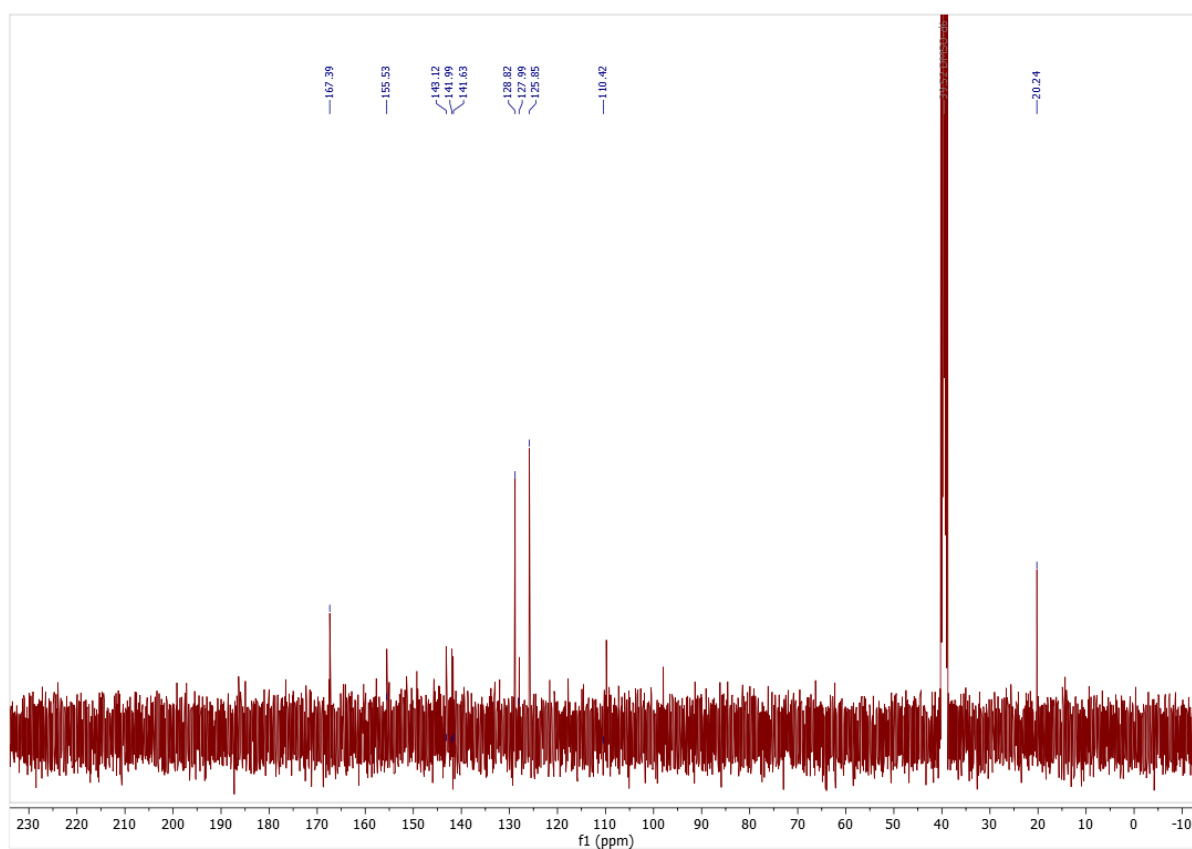

17

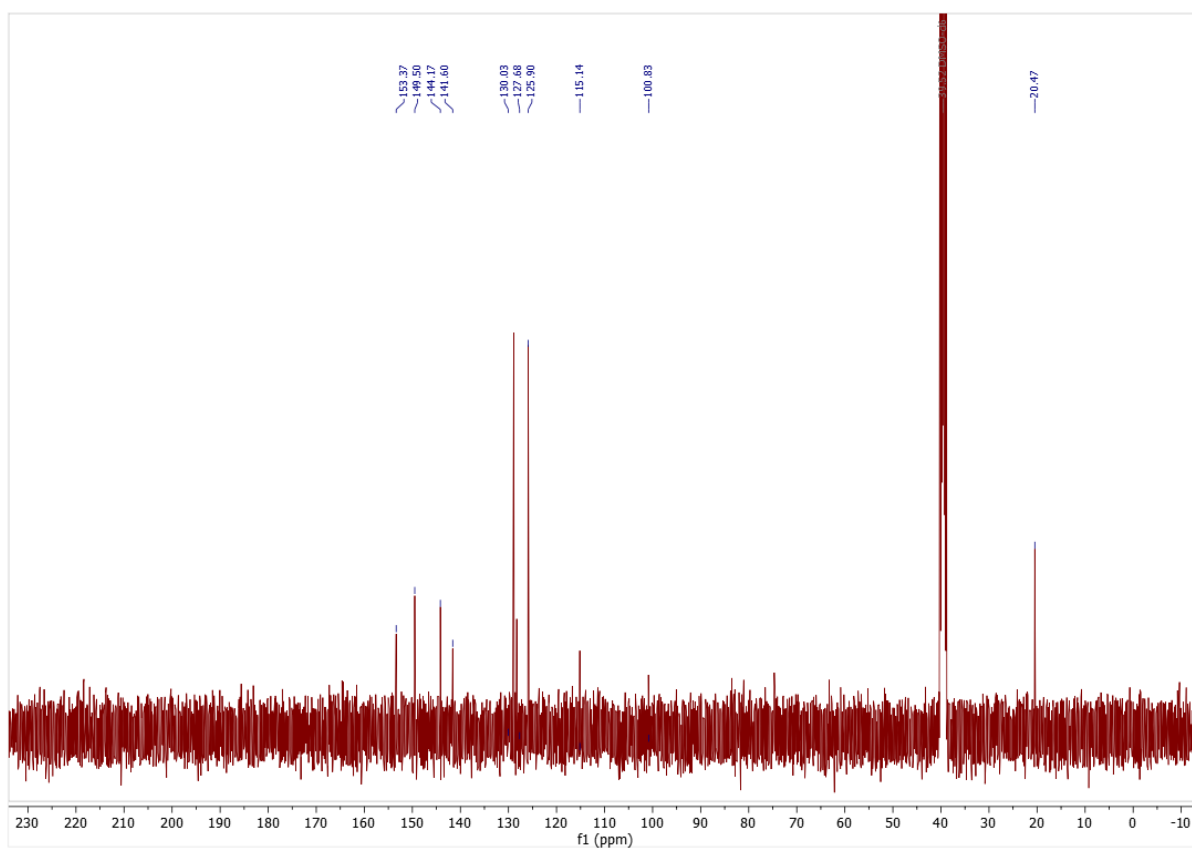

22

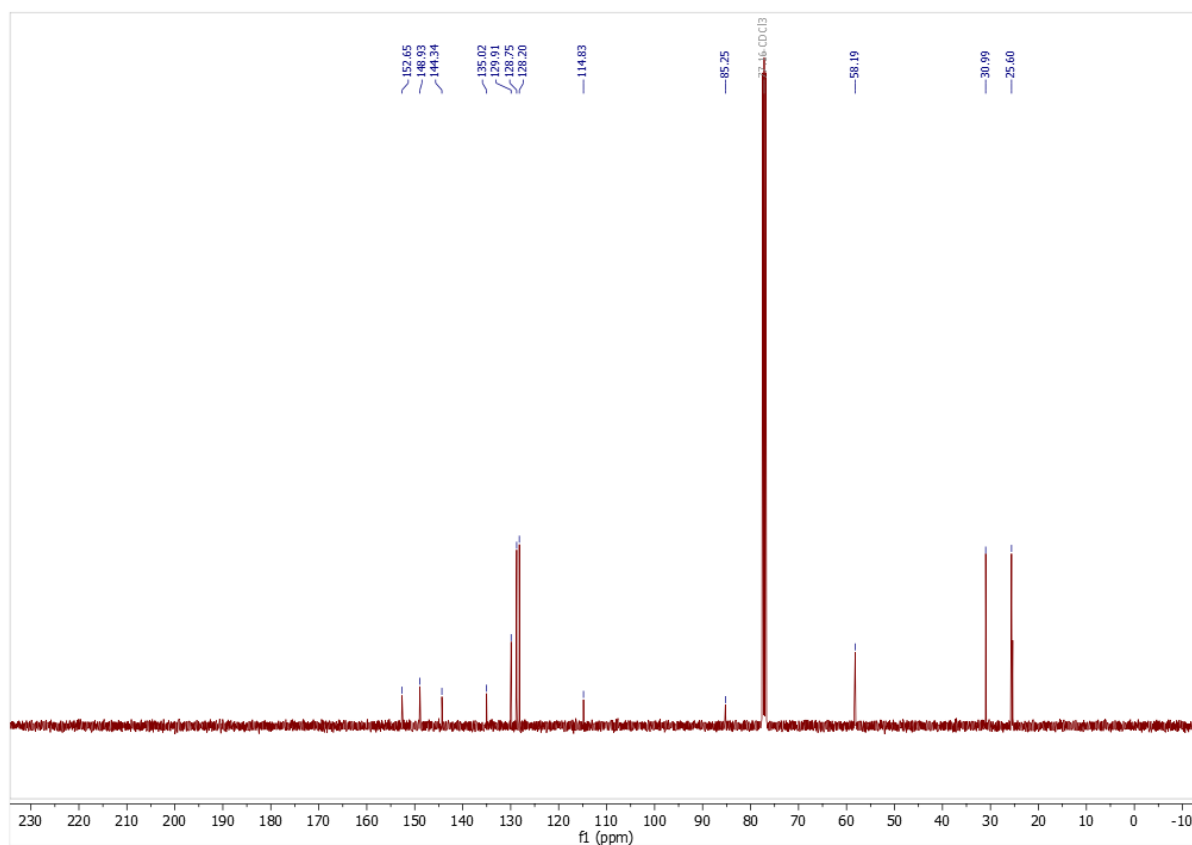

25a (EtOAc crossed)

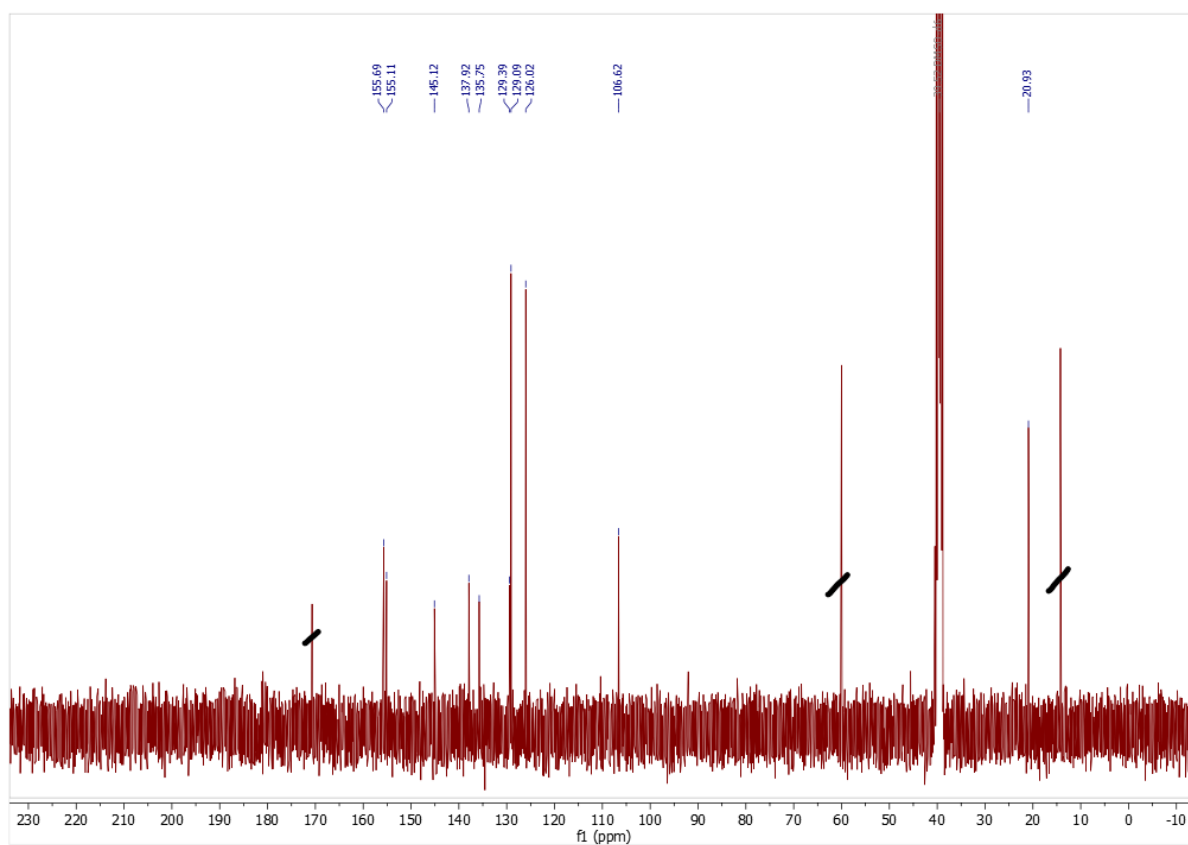

25c

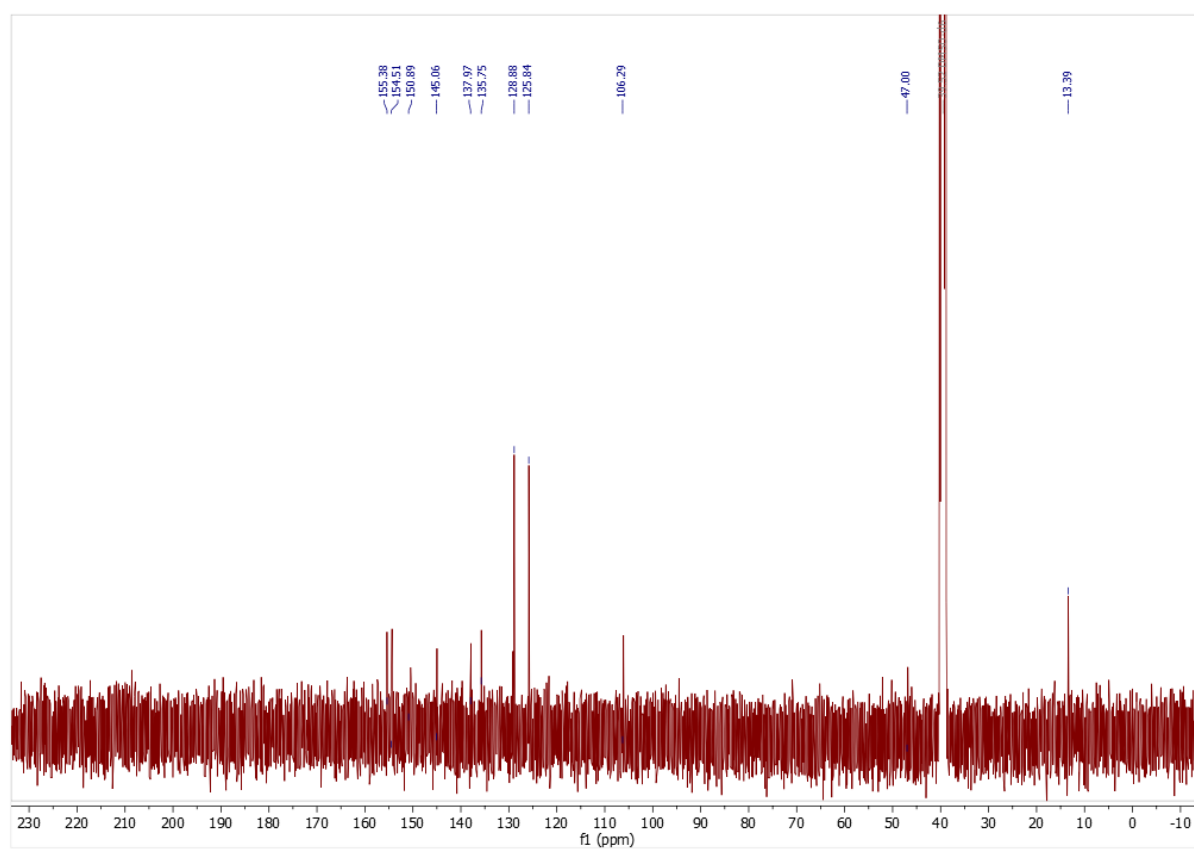

25d

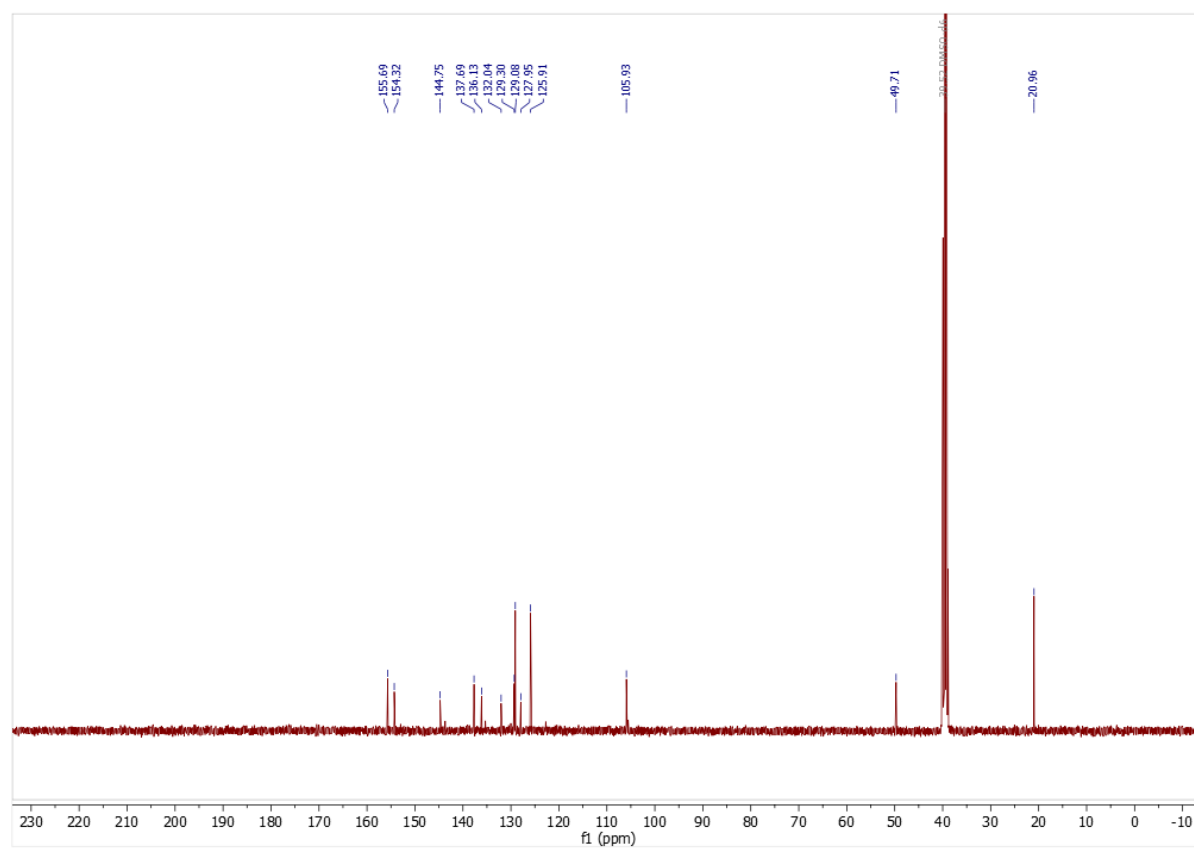

25e

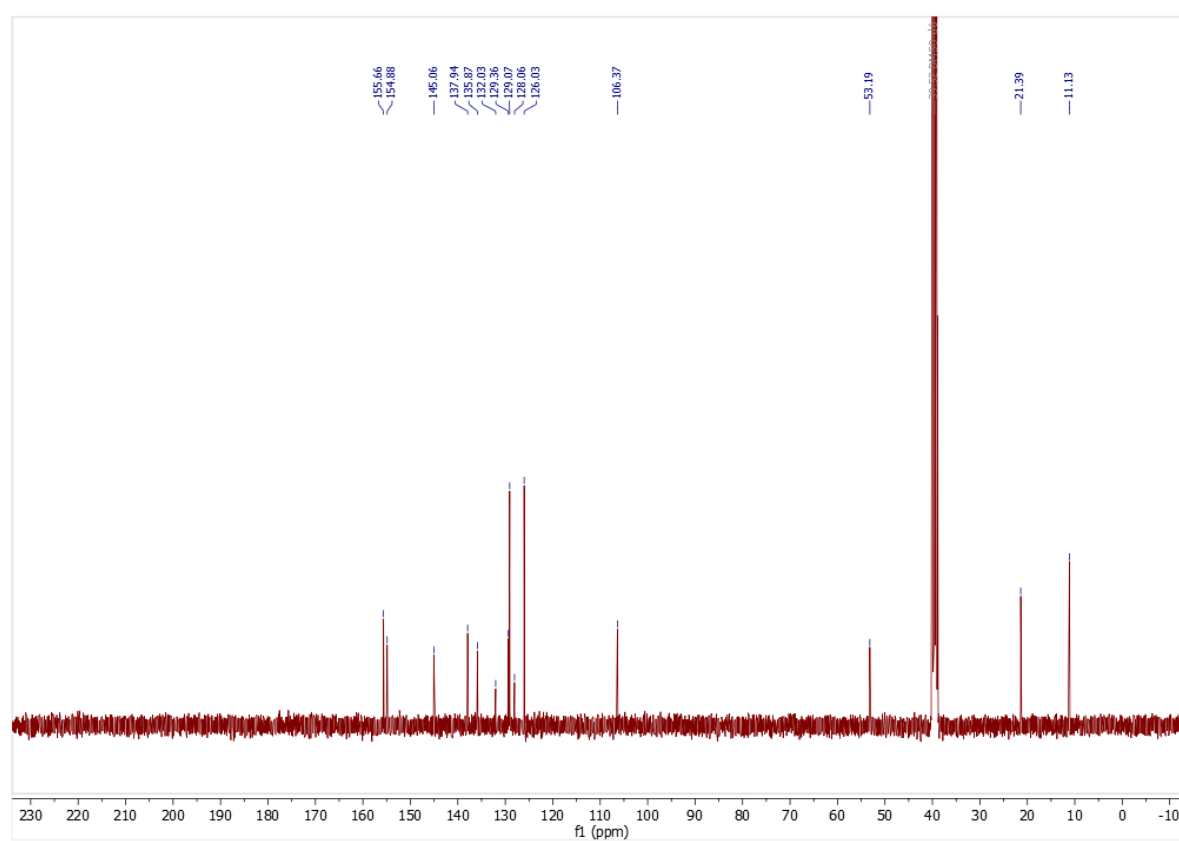

25f

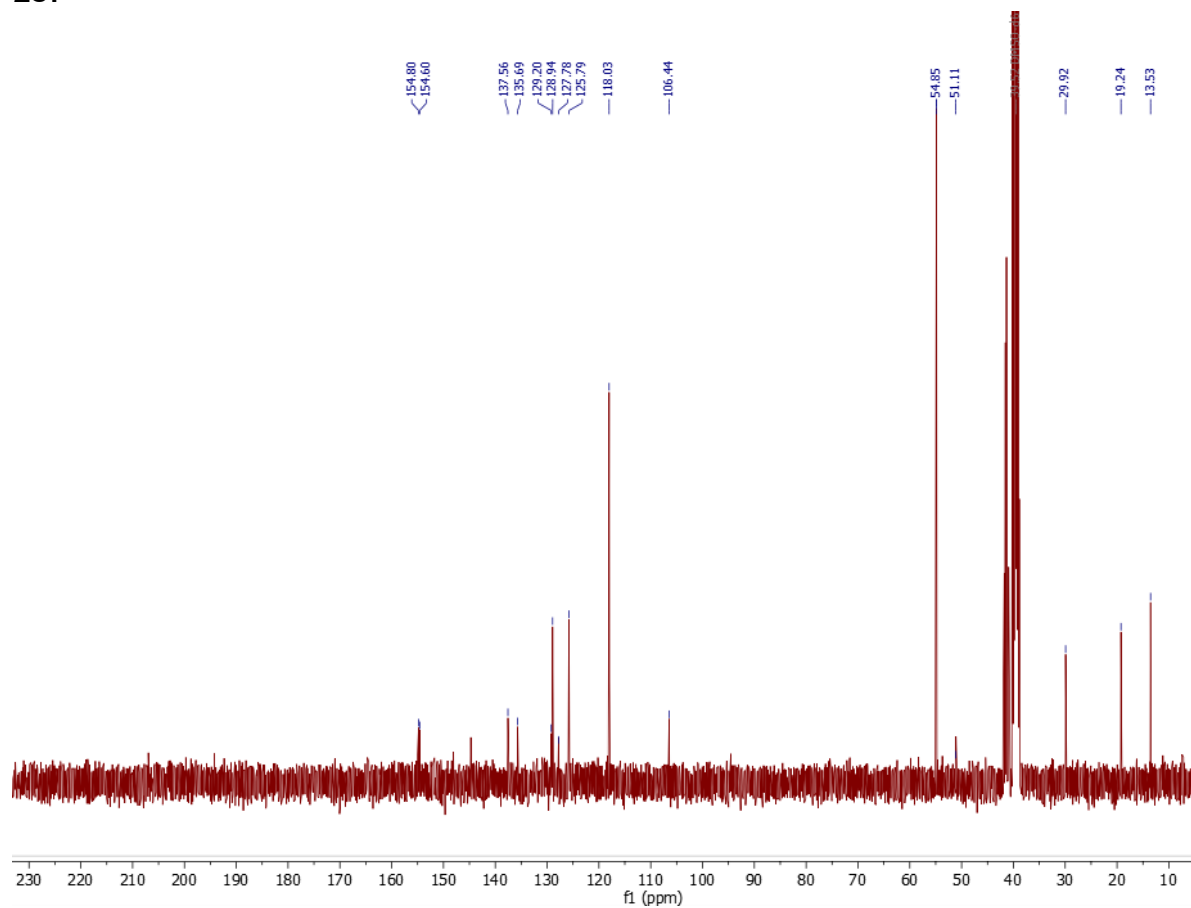

27

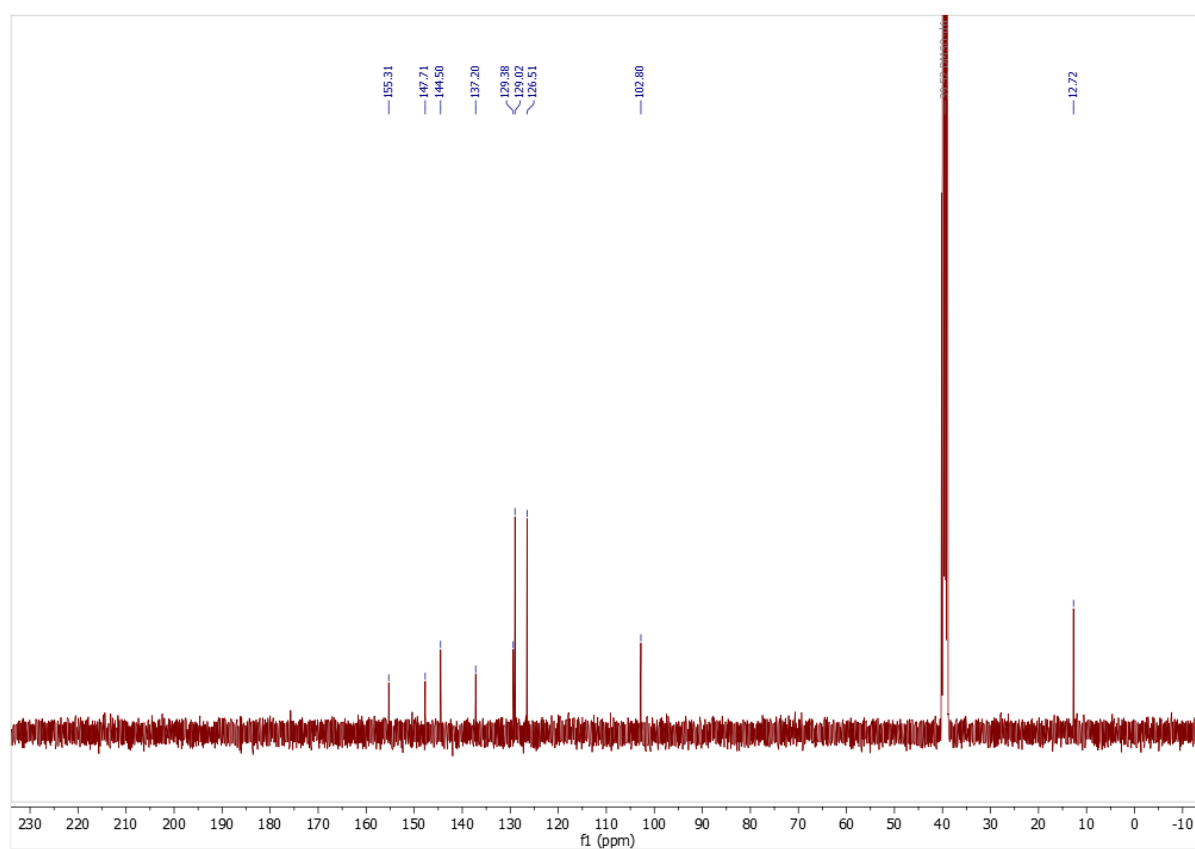

28

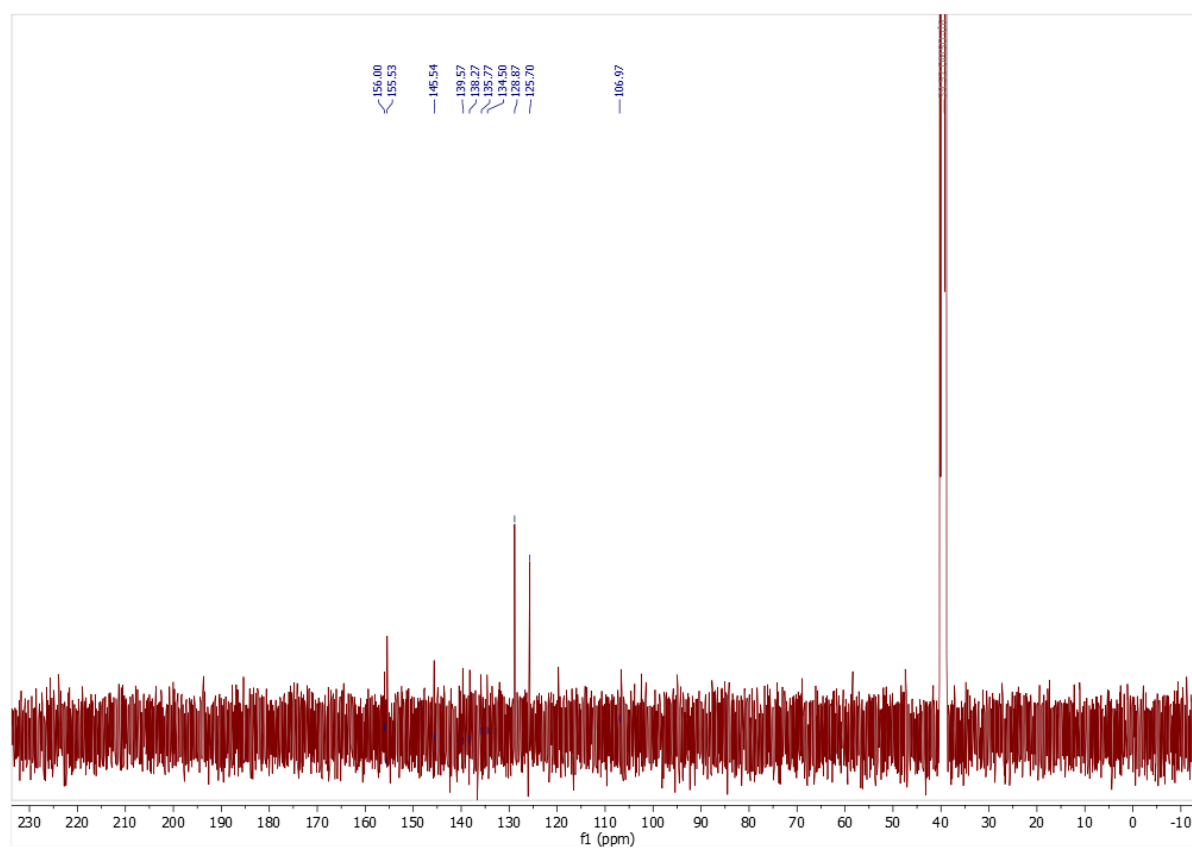

29a

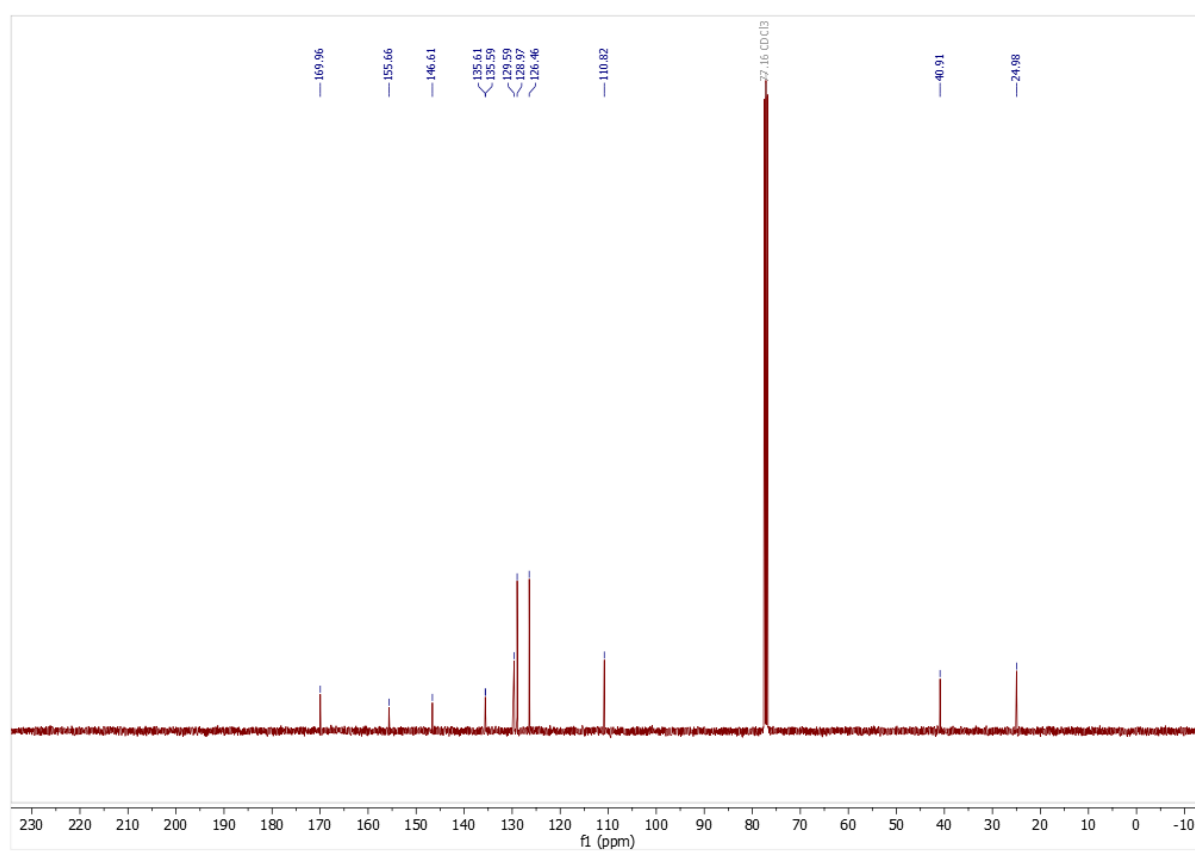

29b

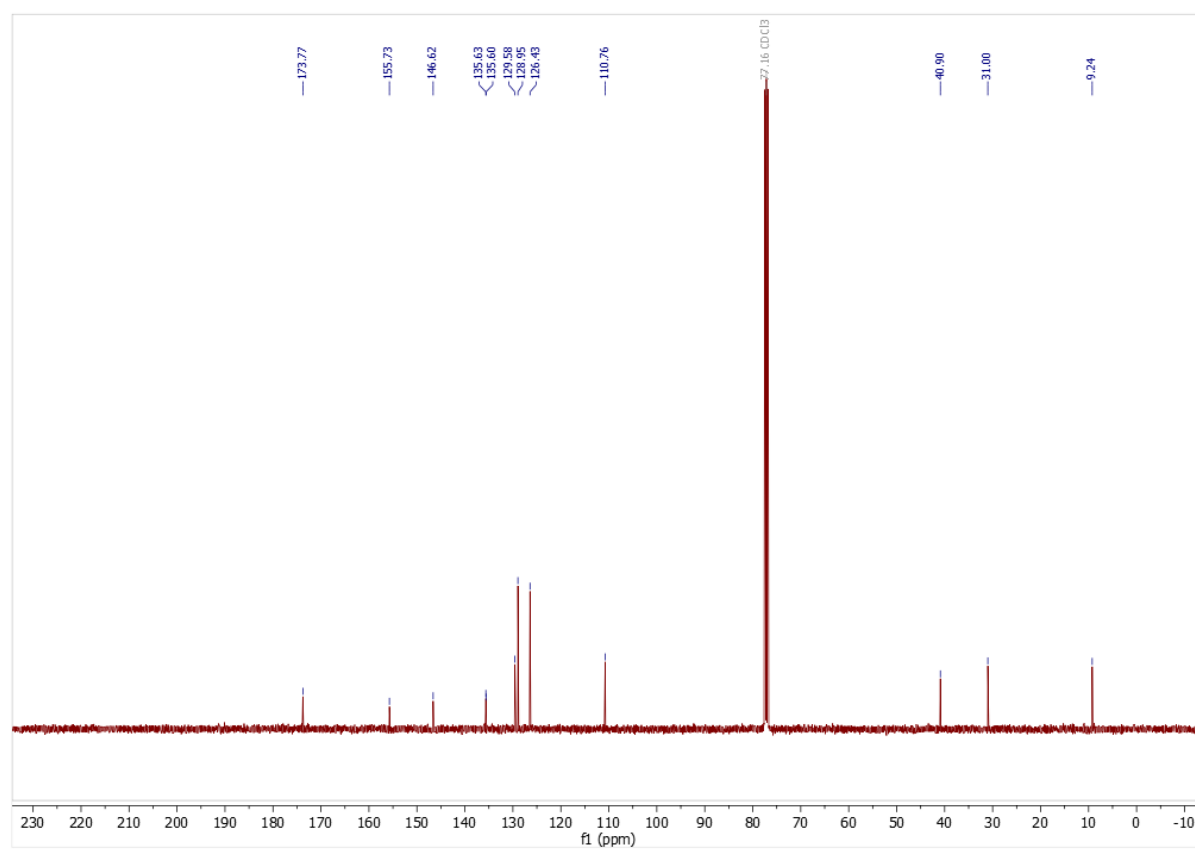

29c

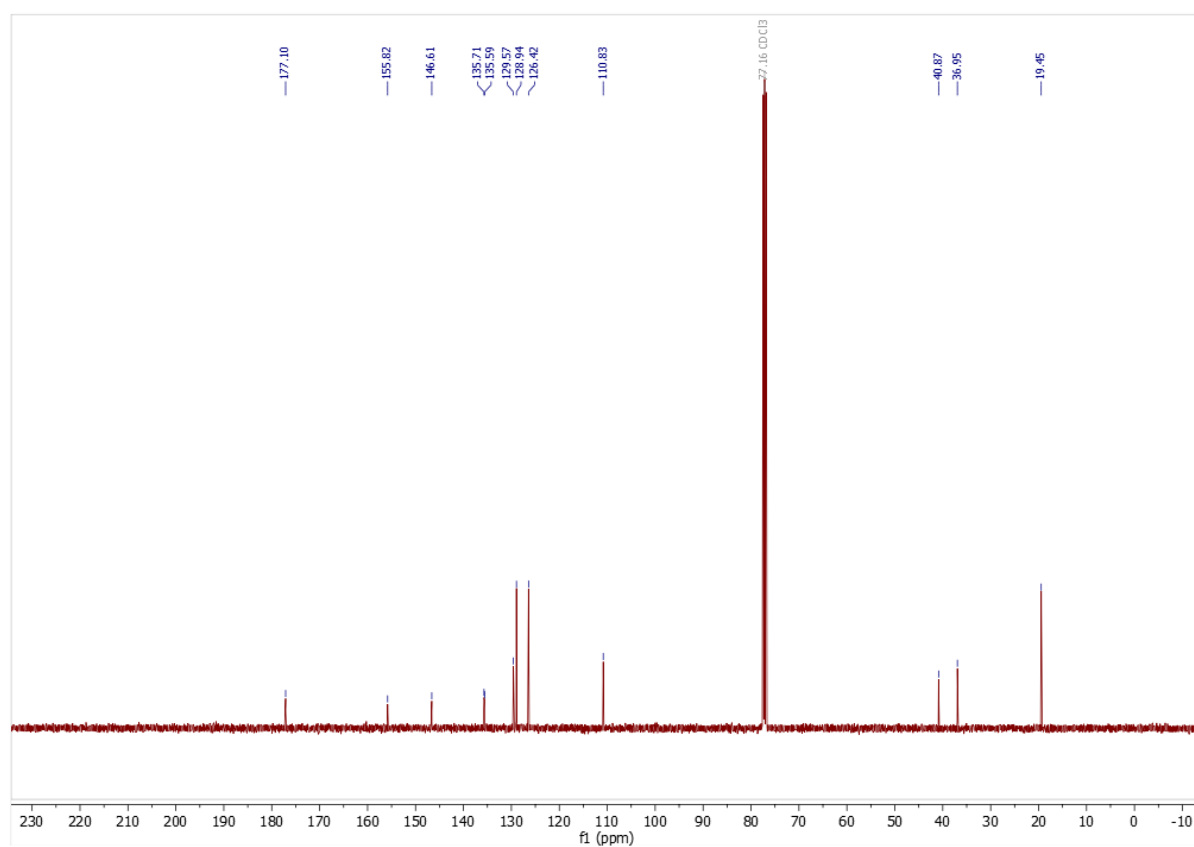

30b

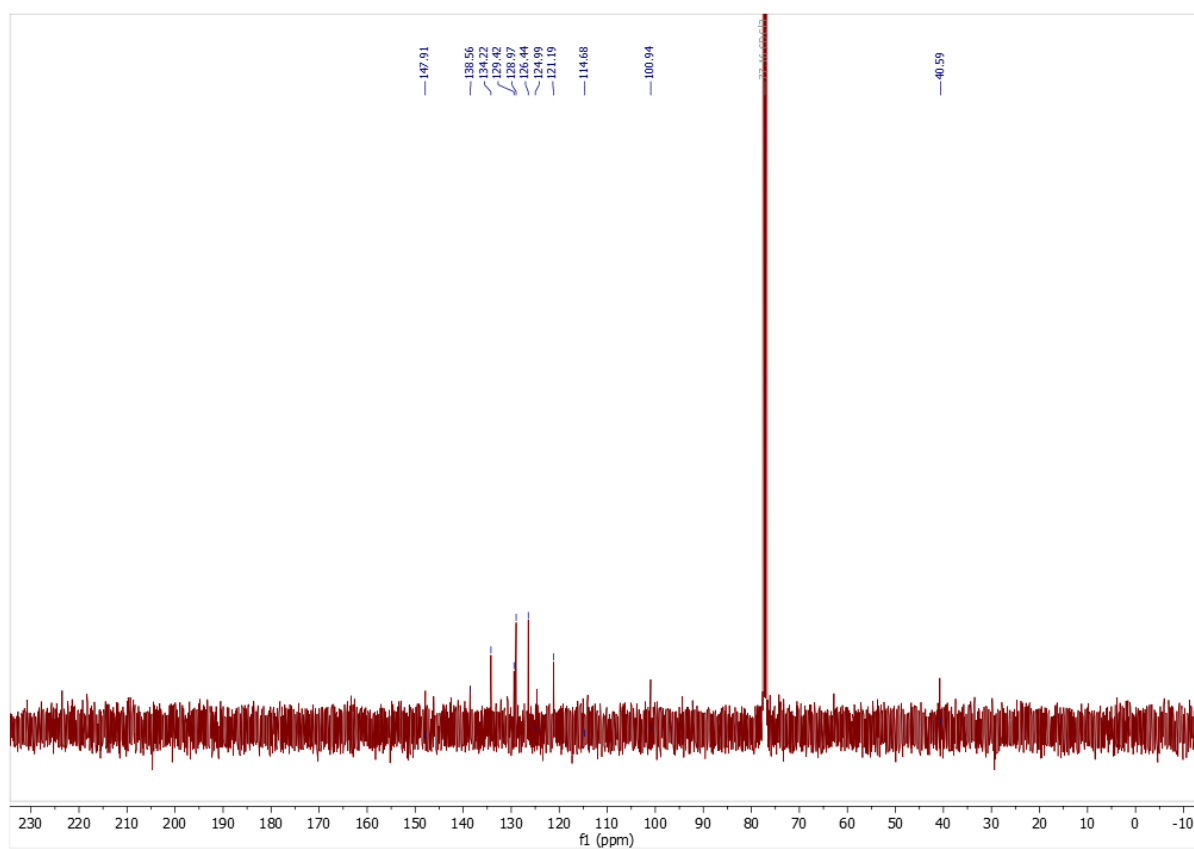

35

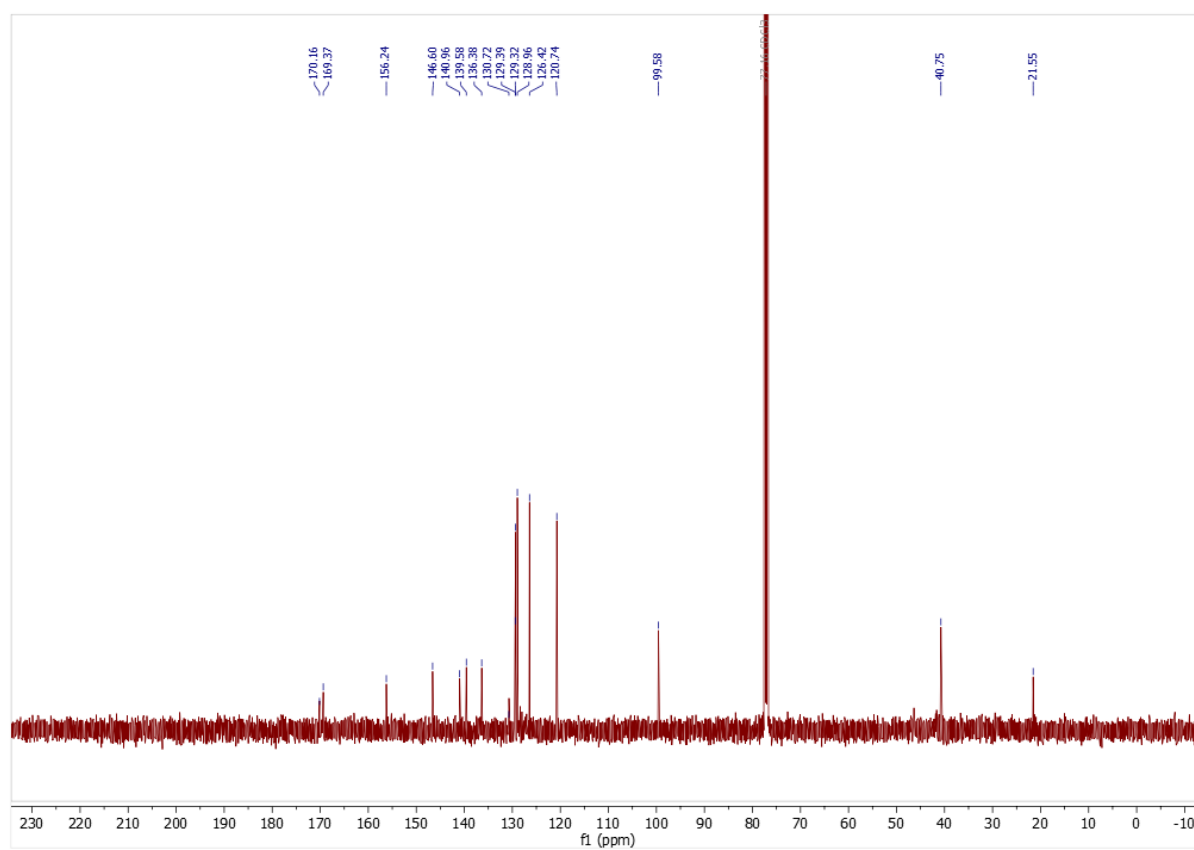

42a

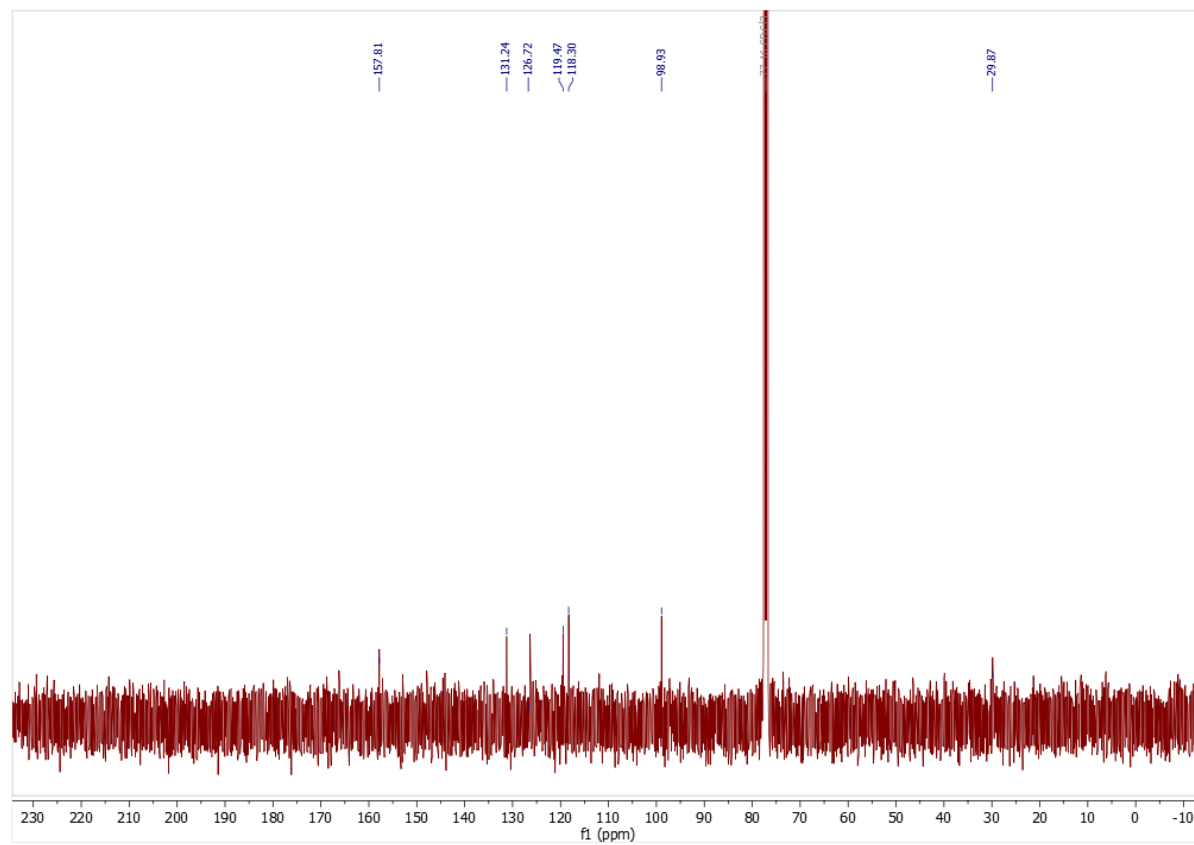



51

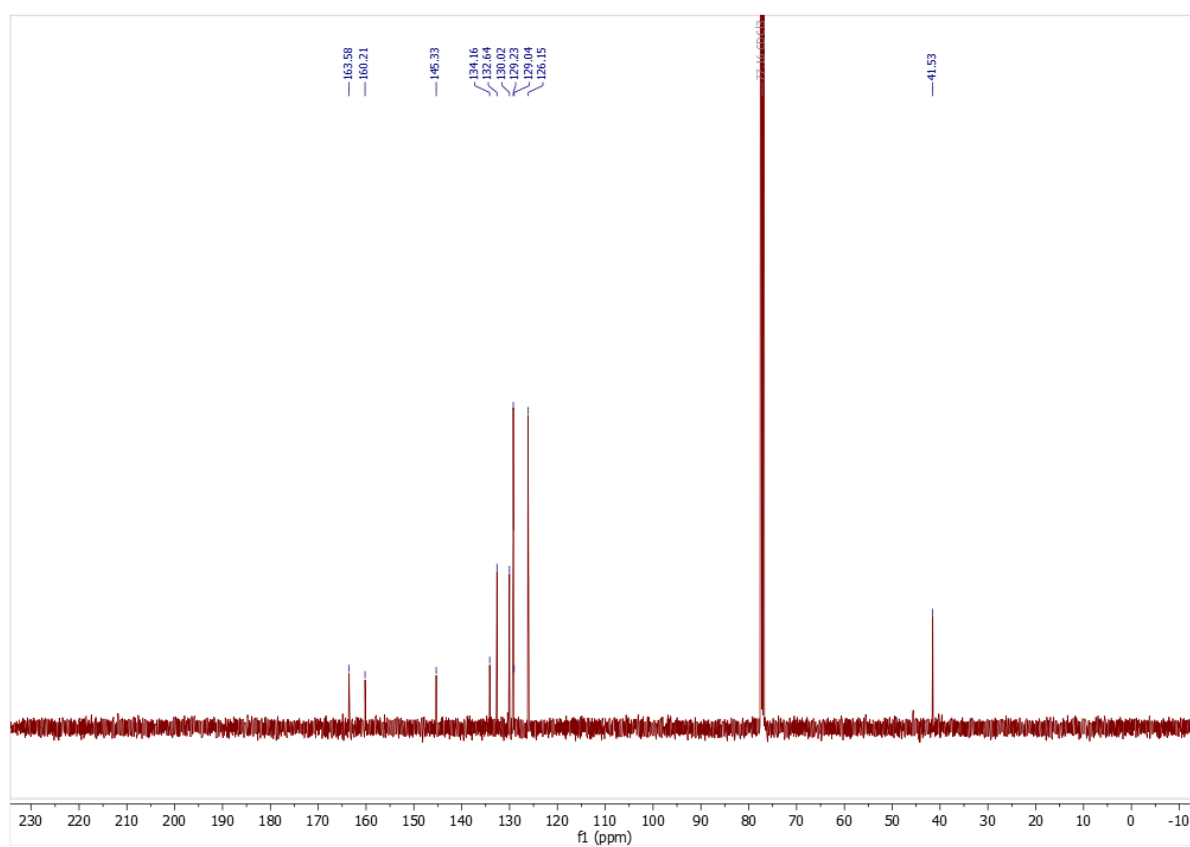

54

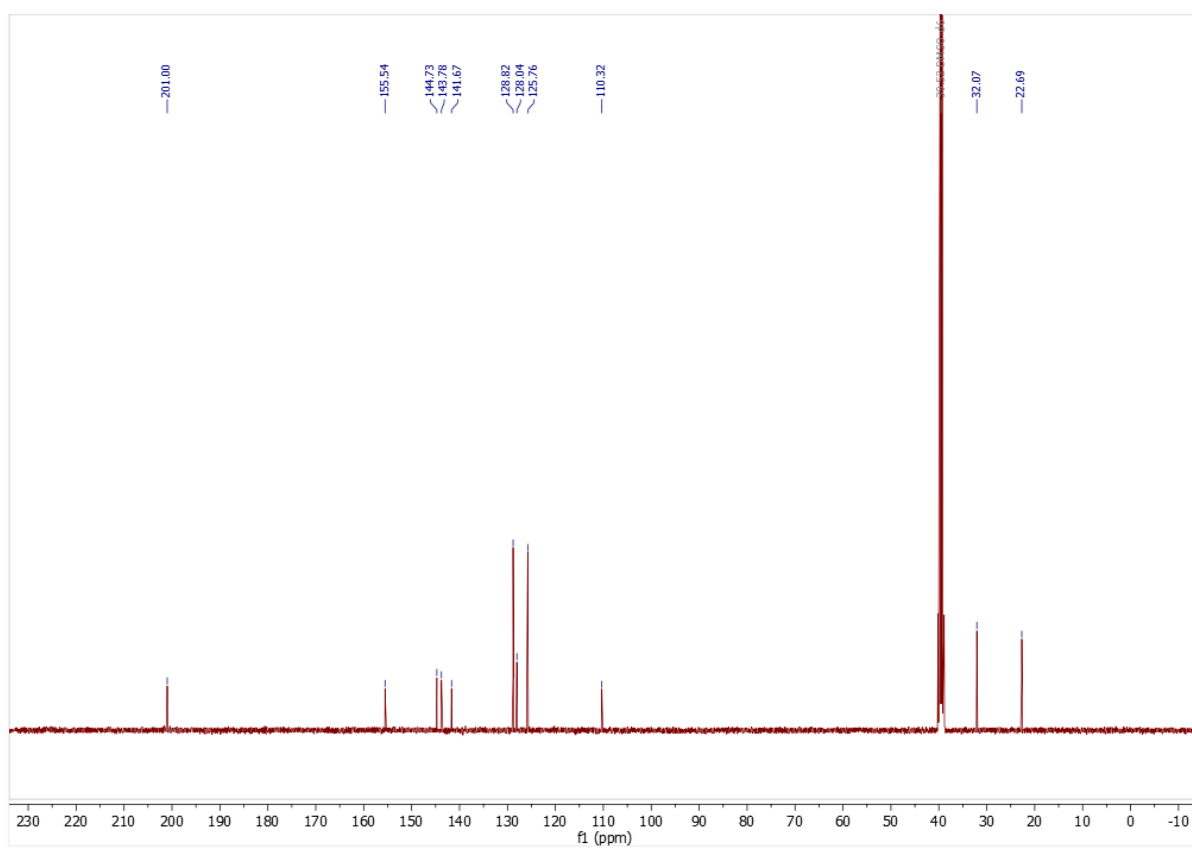

55

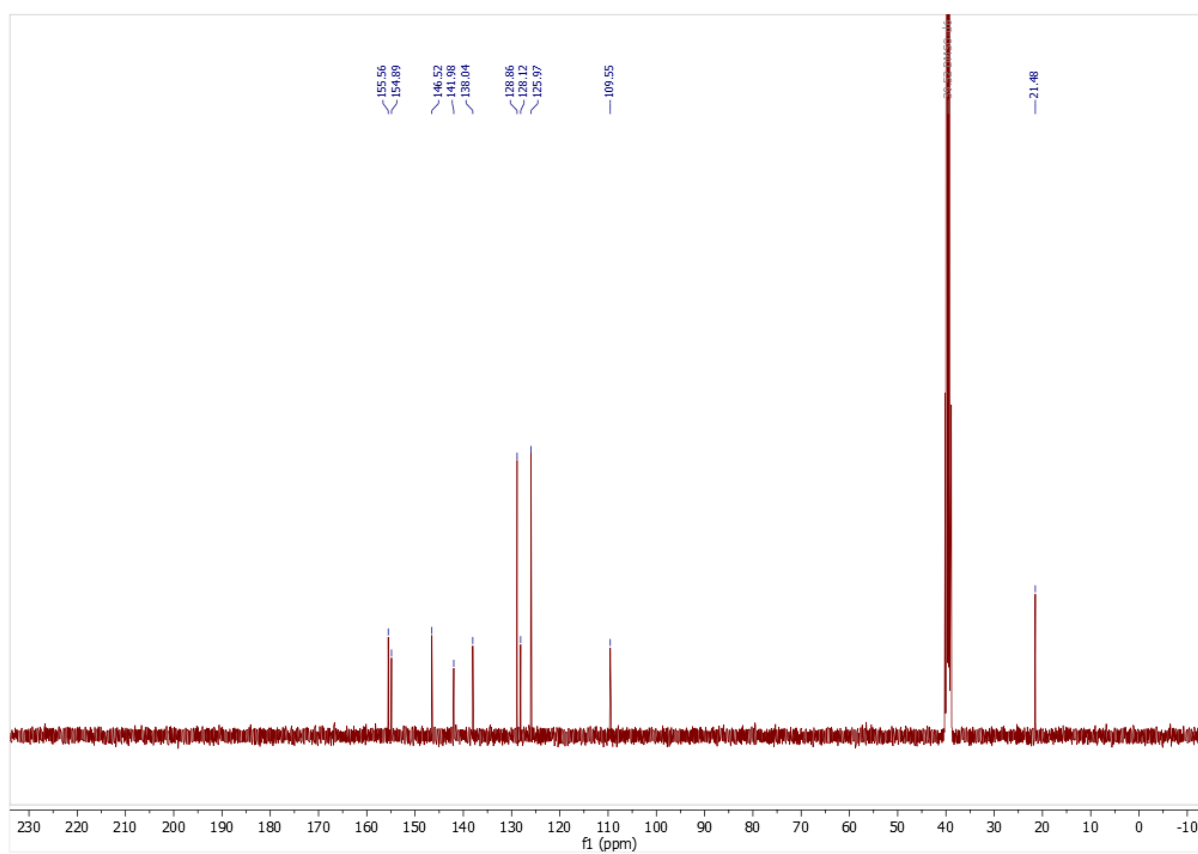

57

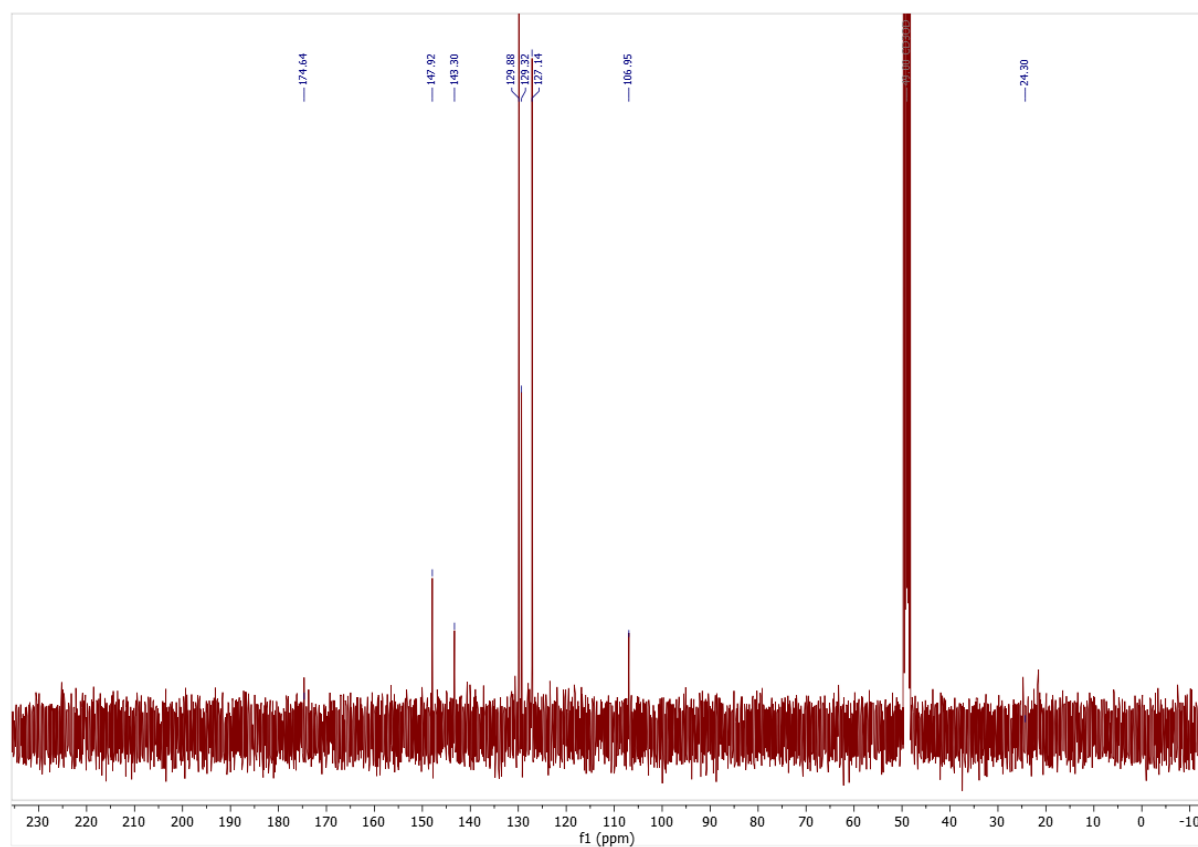

## Mass spectra

### 4a

52279\_220706182622\_#7 RT: 0.11 AV: 1 SM: 9G NL: 9.80E5  
F: +p ESIQ1MS [100.000-700.000]

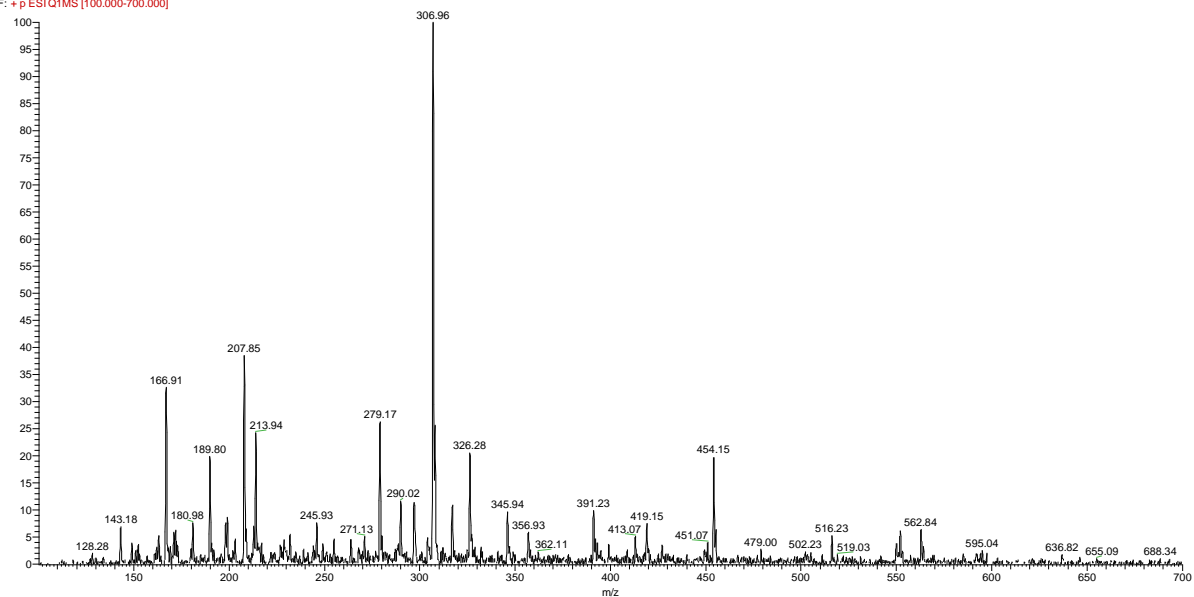

### 4b

52281\_#5-11 RT: 0.07-0.18 AV: 7 SM: 9G NL: 2.87E6  
F: +p ESIQ1MS [100.000-700.000]

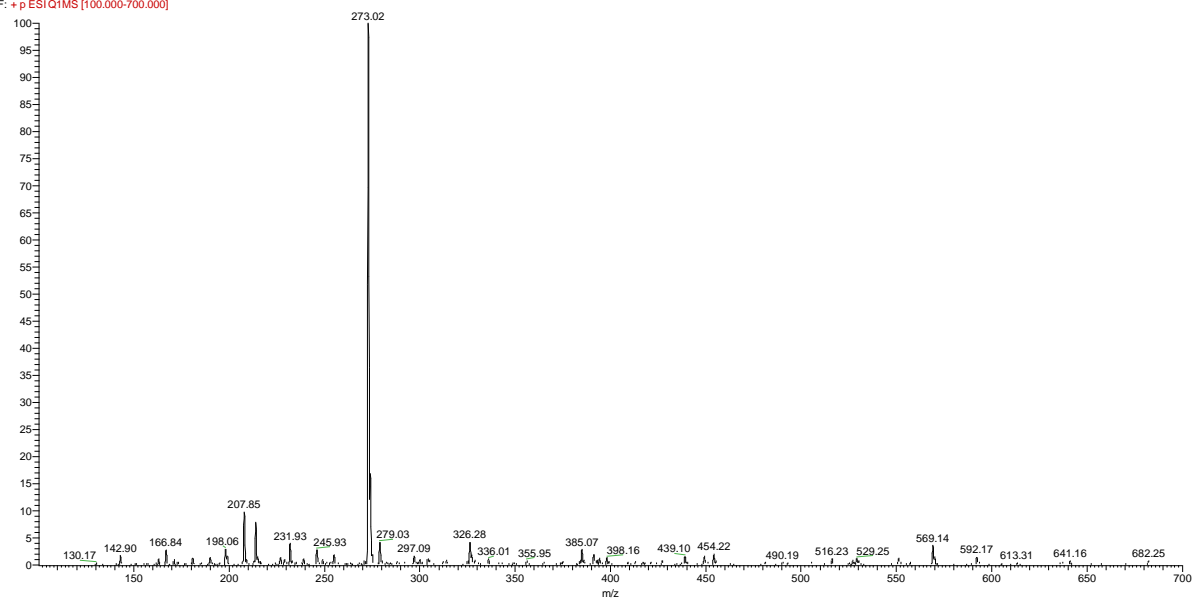

6

52282 #6-12 RT: 0.09-0.20 AV: 7 SM: 9G NL: 8.58E6  
F: +pESI/Q1MS [100.000-700.000]

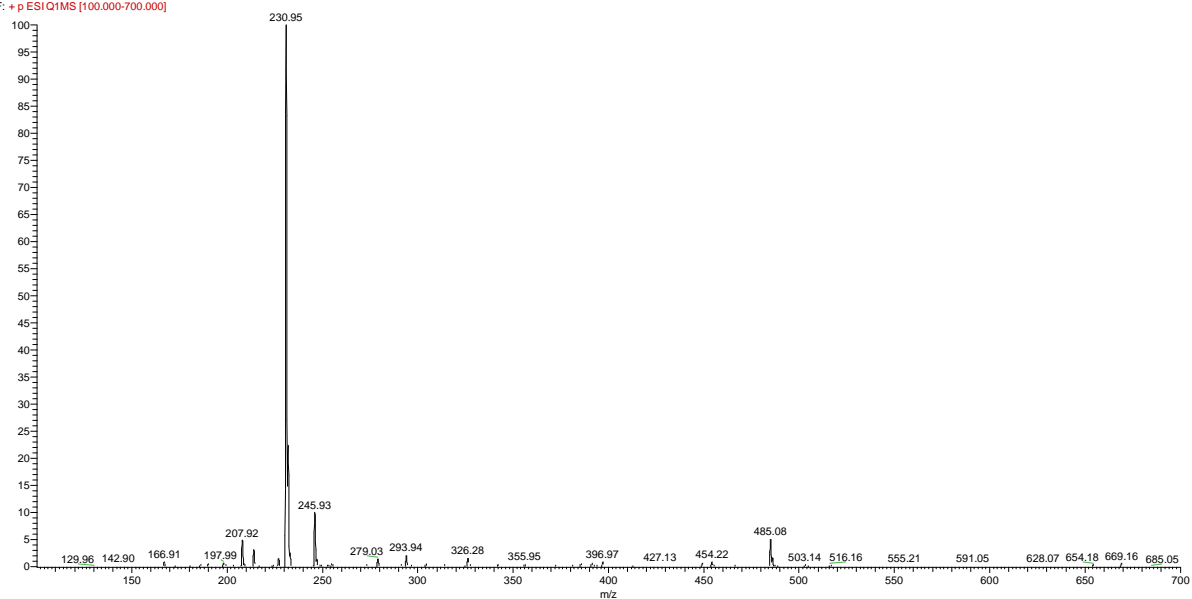

7

52280\_220707093818 #9 RT: 0.15 AV: 1 SM: 9G NL: 1.18E6  
F: +pESI/Q1MS [100.000-700.000]

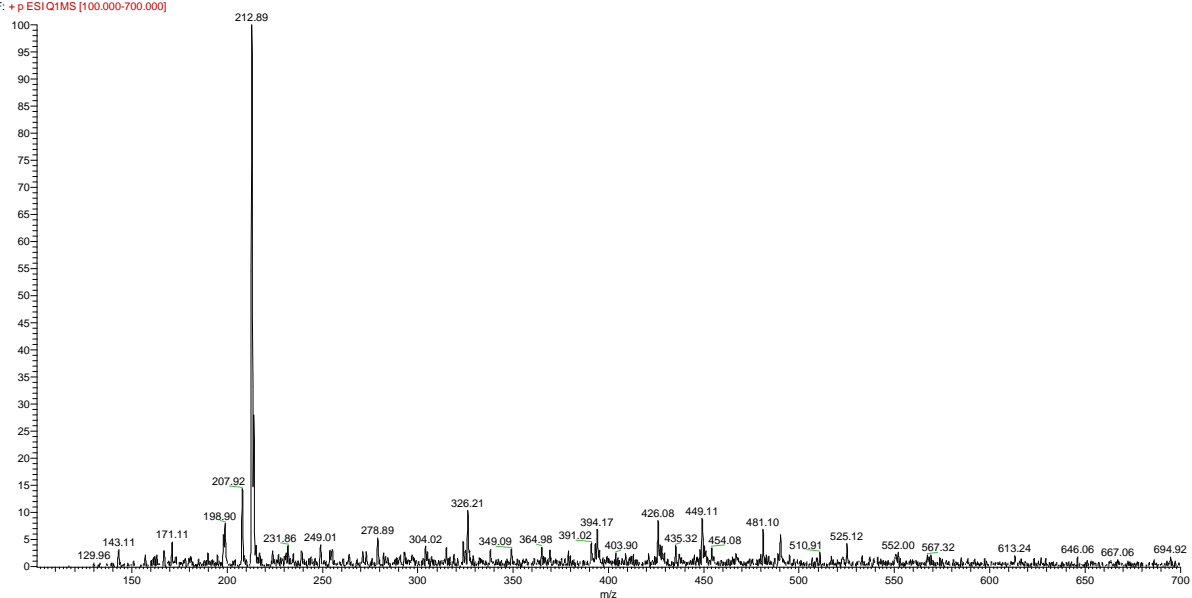

16

52285\_220707100131 #13 RT: 0.22 AV: 1 SM: 9G NL: 1.23E6  
F: +p ESI Q1MS [100.000-700.000]

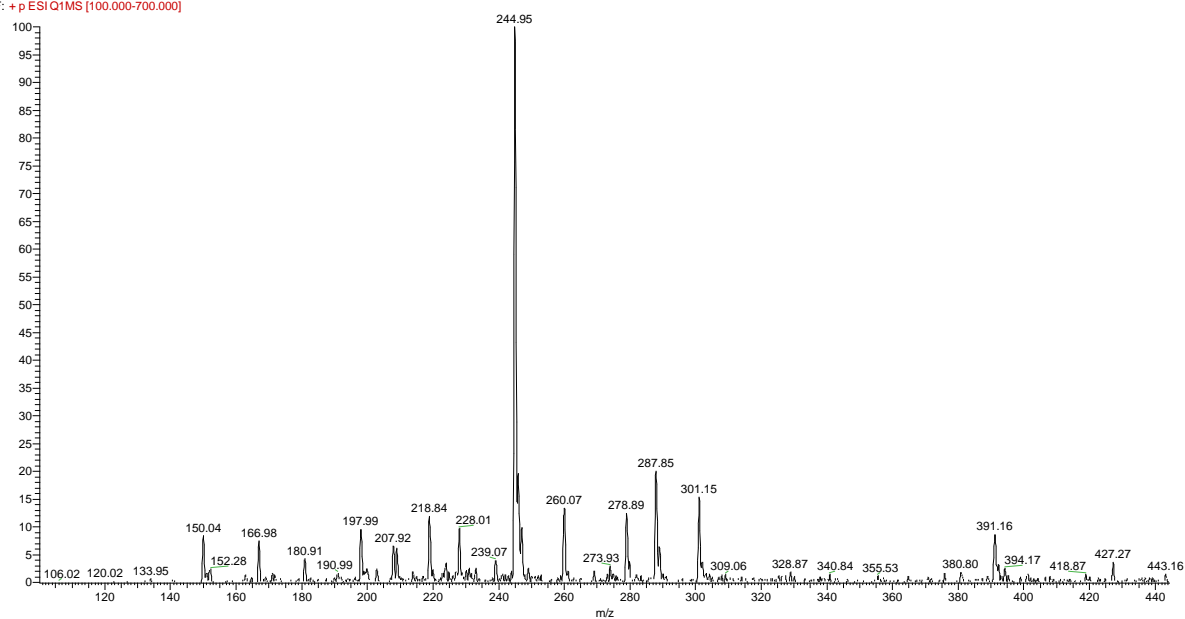

17

52286\_220707100433 #17 RT: 0.29 AV: 1 SM: 9G NL: 1.12E6  
F: +p ESI Q1MS [100.000-700.000]

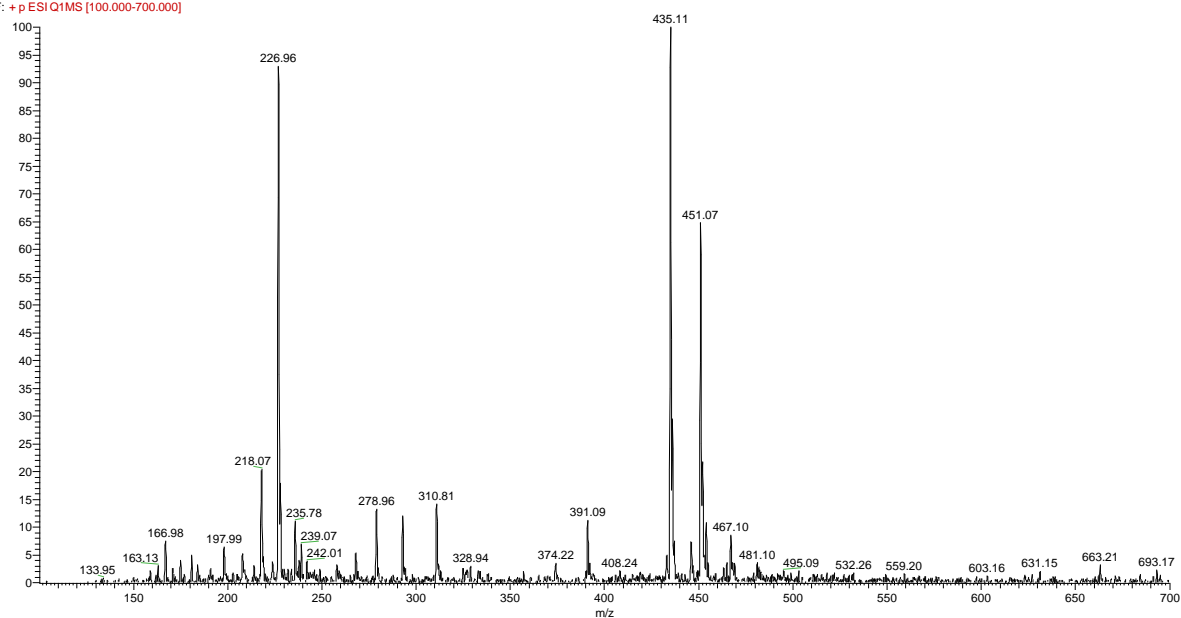

# 22

52290 #7-10 RT: 0.11-0.16 AV: 4 SM: 9G NL: 1.90E6  
F: +pESI/Q1MS [100.000-700.000]

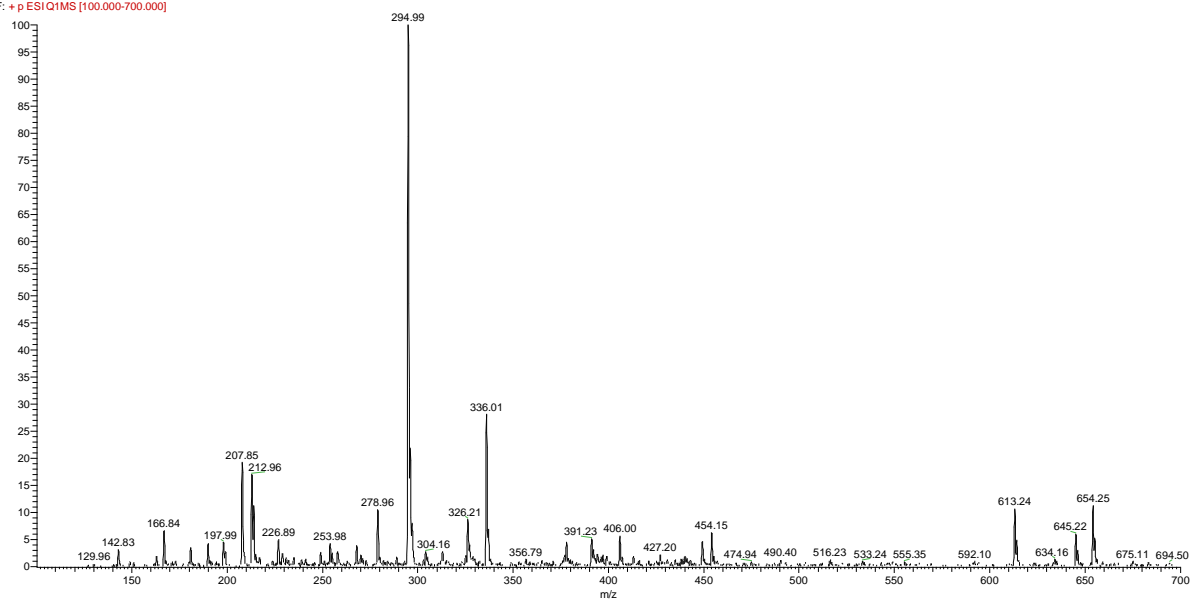

# 25a

52284 220707094306 #7 RT: 0.17 AV: 1 SM: 9G NL: 7.47E5  
F: +pESI/Q1MS [100.000-700.000]

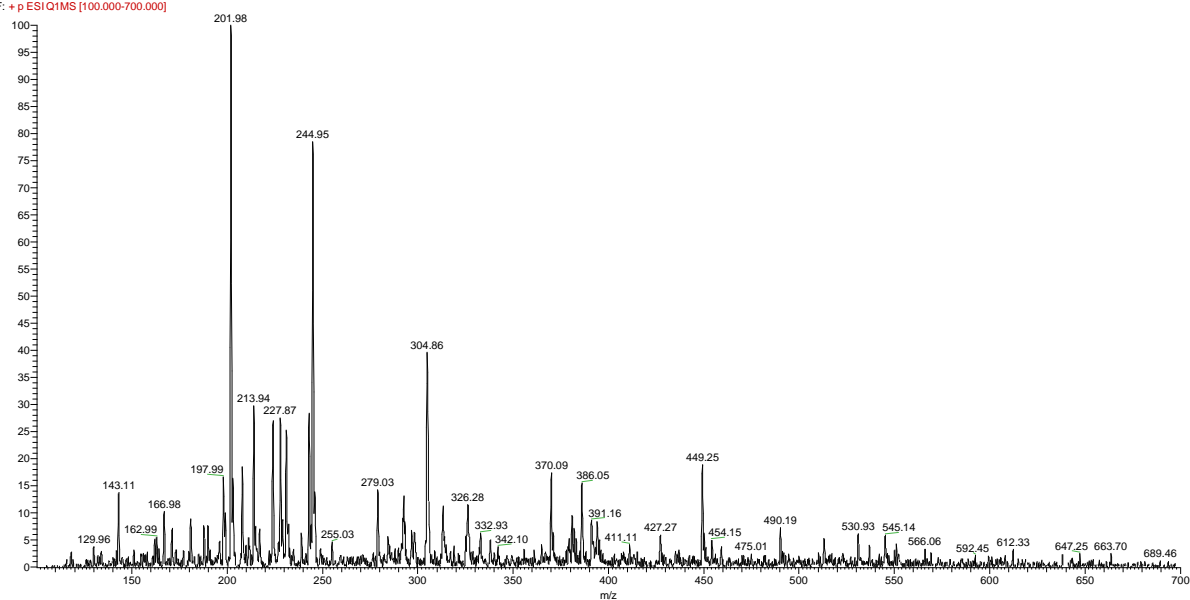

25c

52295\_220707101040 #14 RT: 0.23 AV: 1 SM: 9G NL: 1.00E6  
F: +pESI Q1MS [100.000-700.000]

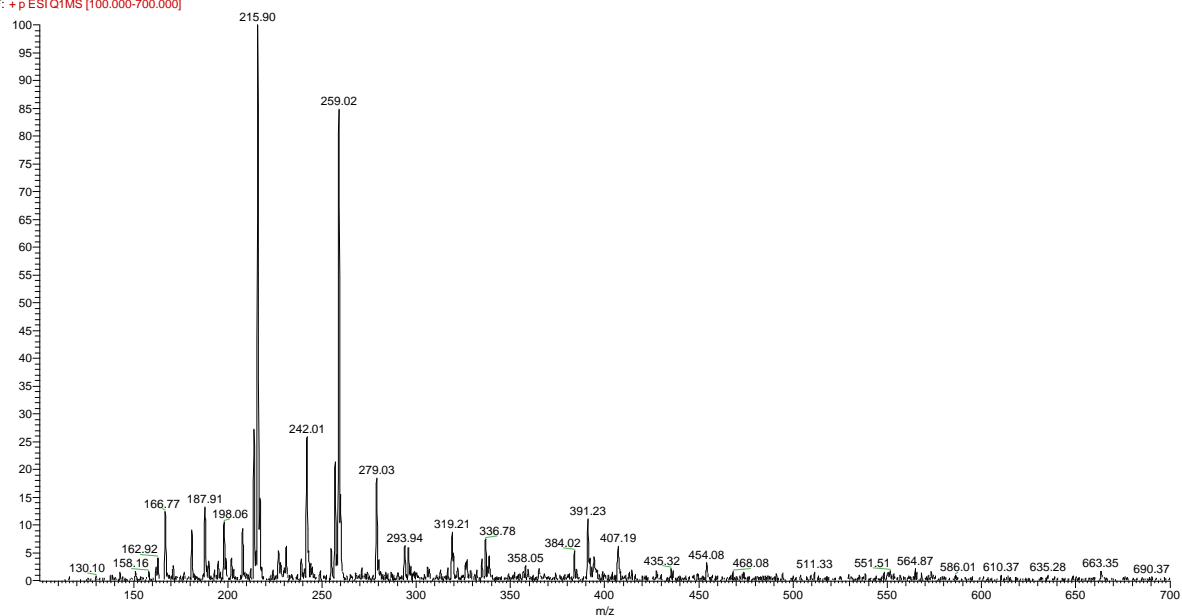

25d

52297 #14 RT: 0.23 AV: 1 SM: 9G NL: 1.31E6  
F: +pESI Q1MS [100.000-700.000]

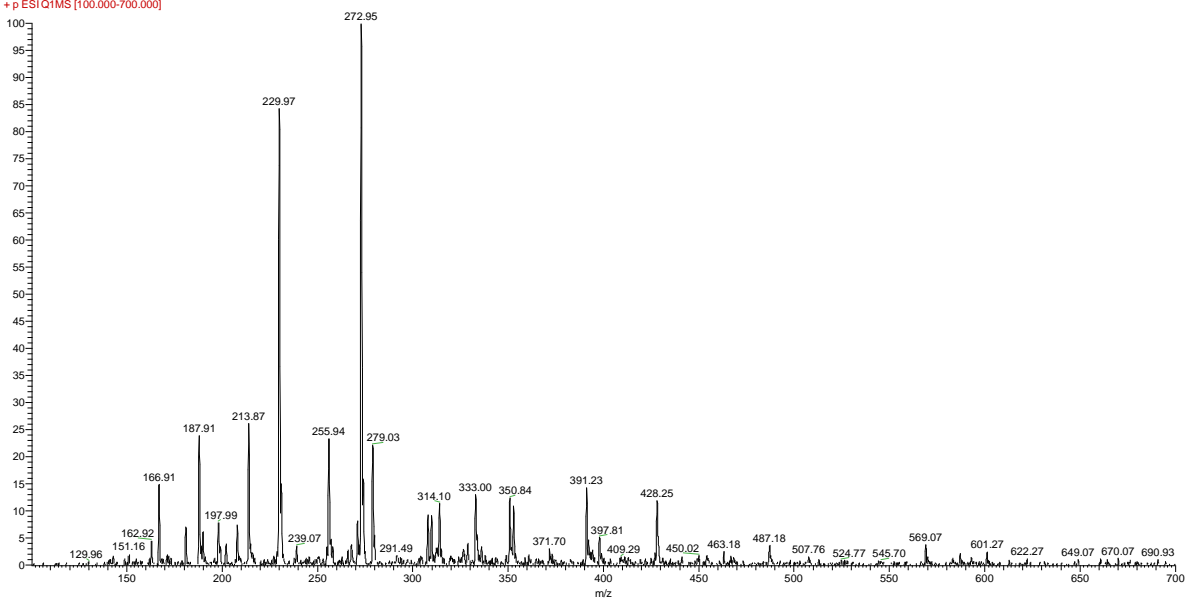

## 25e

52296\_220707101343 #16 RT: 0.27 AV: 1 SM: 9G NL: 9.99E5  
F: +p ESI Q1MS [100.000-700.000]

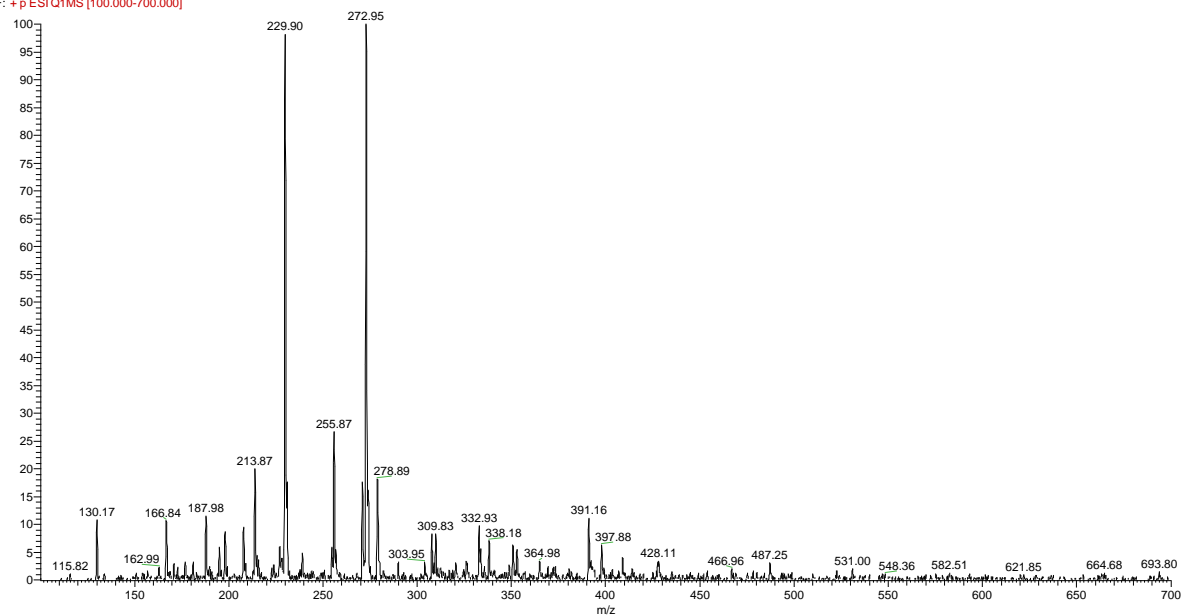

## 25f

52298 #12 RT: 0.20 AV: 1 SM: 9G NL: 2.89E6  
F: +p ESI Q1MS [100.000-700.000]

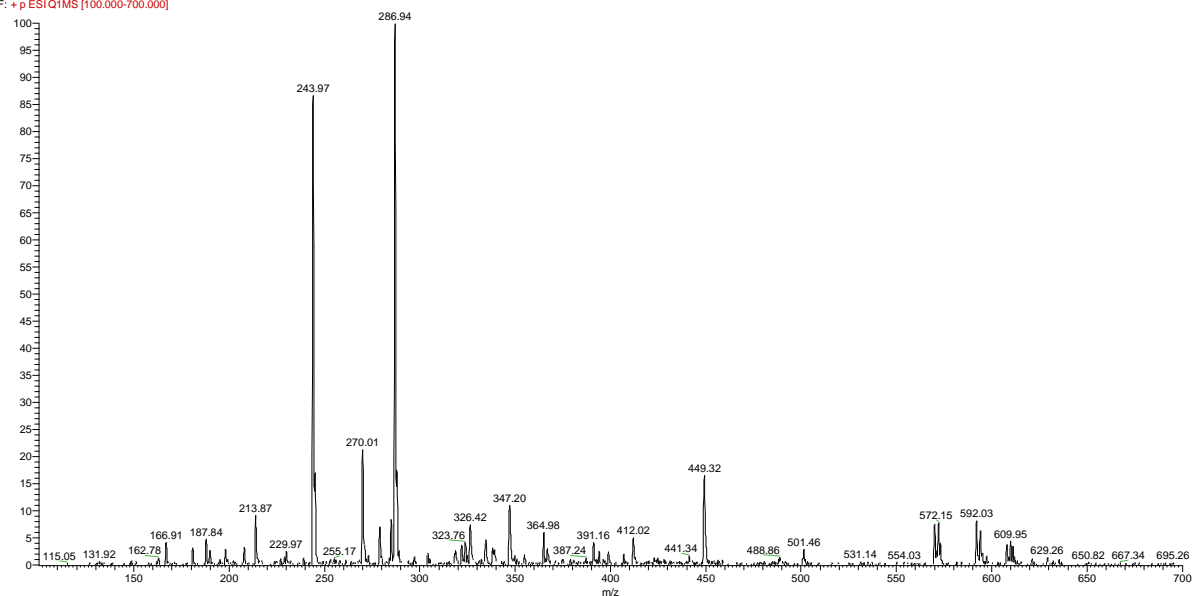



27

52304 #5-9 RT: 0.07-0.15 AV: 5 SM: 9G NL: 1.86E7  
F: +pESI/Q1MS [100.000-700.000]

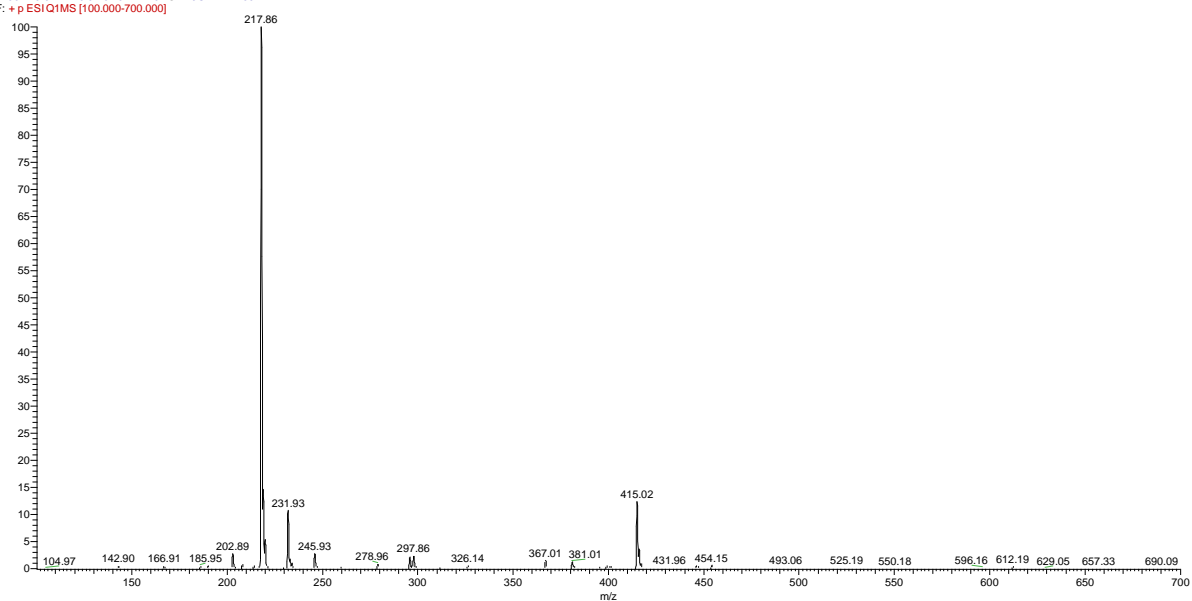

28

52283\_220707094941 #11 RT: 0.18 AV: 1 SM: 9G NL: 7.53E5  
F: +pESI/Q1MS [100.000-700.000]

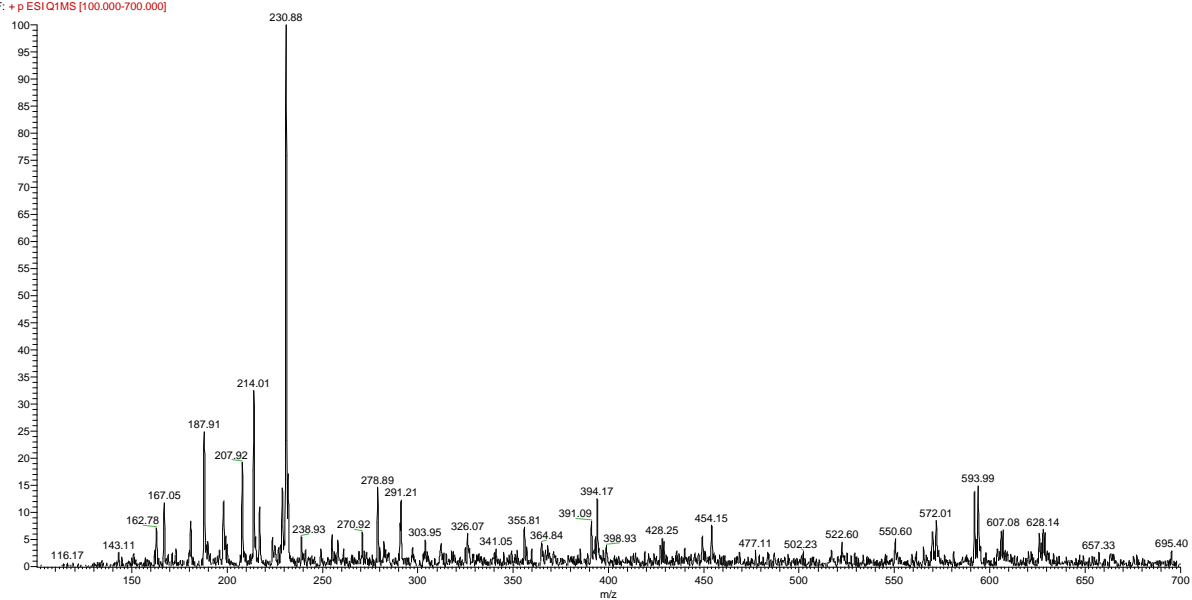

## 29a

52292 #9-13 RT: 0.15-0.22 AV: 5 SM: 9G NL: 1.90E6  
F: +p ESI Q1MS [100.000-700.000]

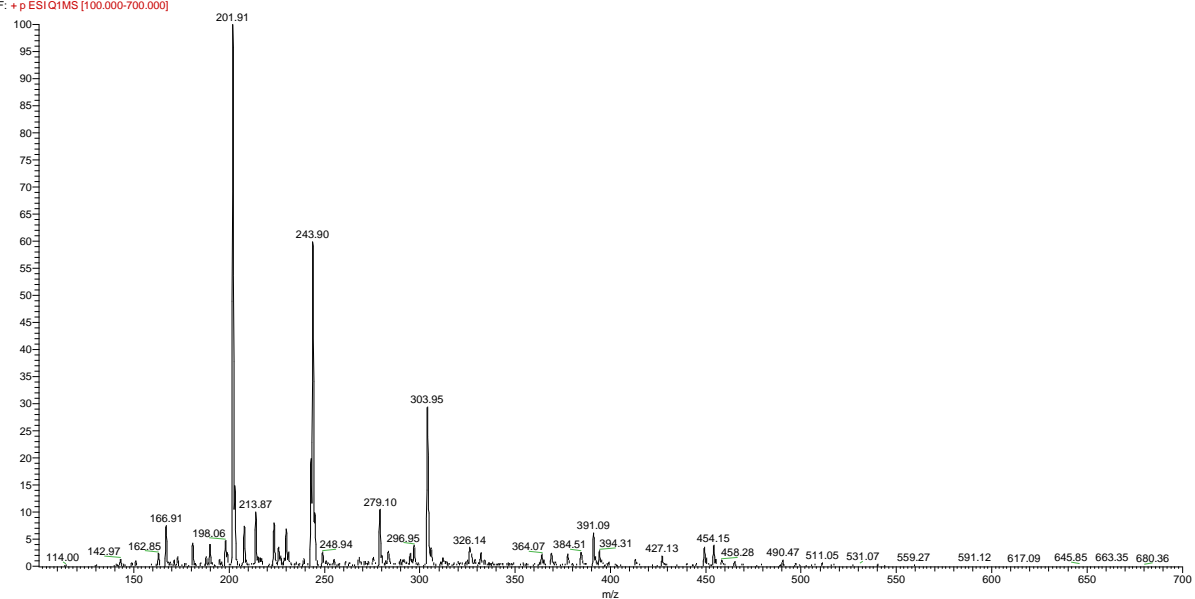

## 29b

52294 #11 RT: 0.18 AV: 1 SM: 9G NL: 4.35E6  
F: +p ESI Q1MS [100.000-700.000]

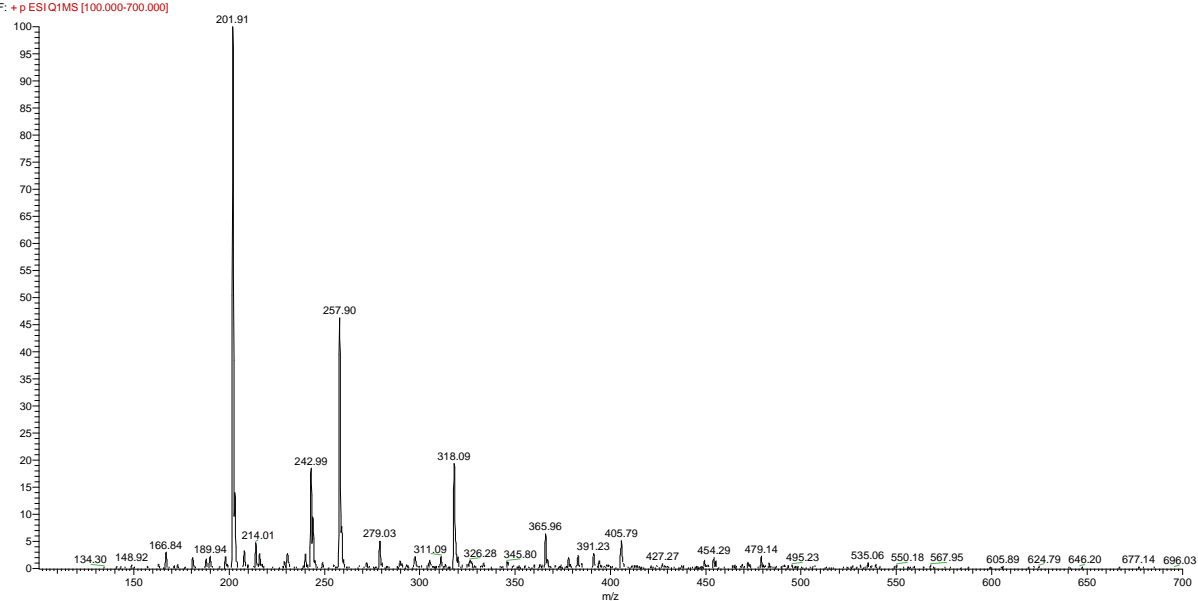

## 29c

52293 #15 RT: 0.25 AV: 1 SM: 9G NL: 1.50E6  
F: +p ESI Q1MS [100.000-700.000]

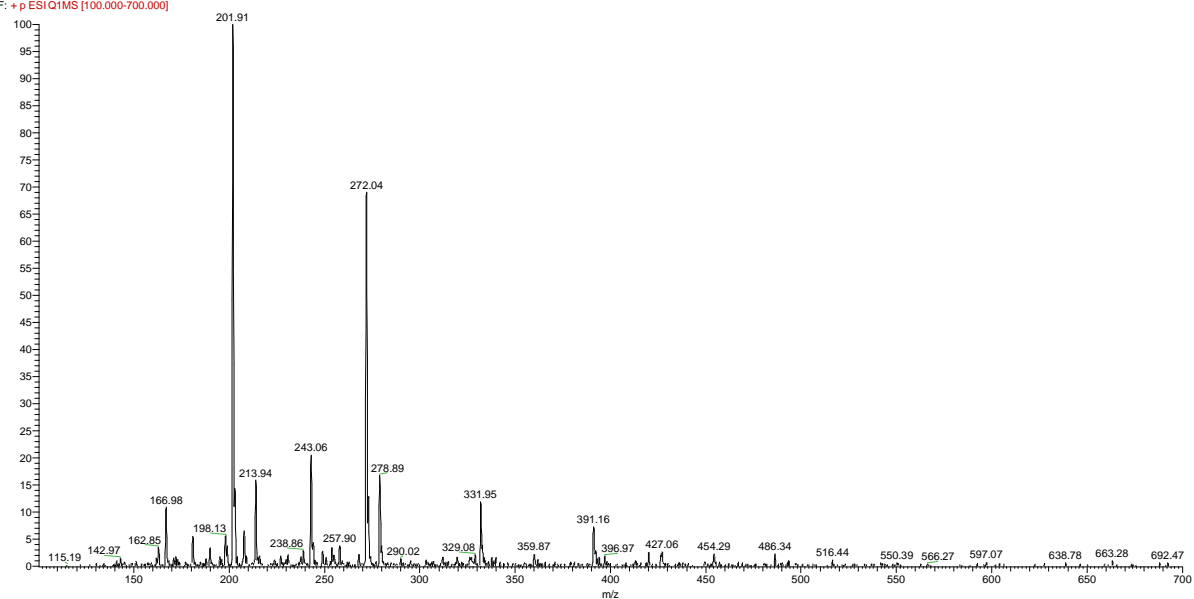

## 30a

52288\_220707100736 #10 RT: 0.16 AV: 1 SM: 9G NL: 9.49E5  
F: +p ESI Q1MS [100.000-700.000]

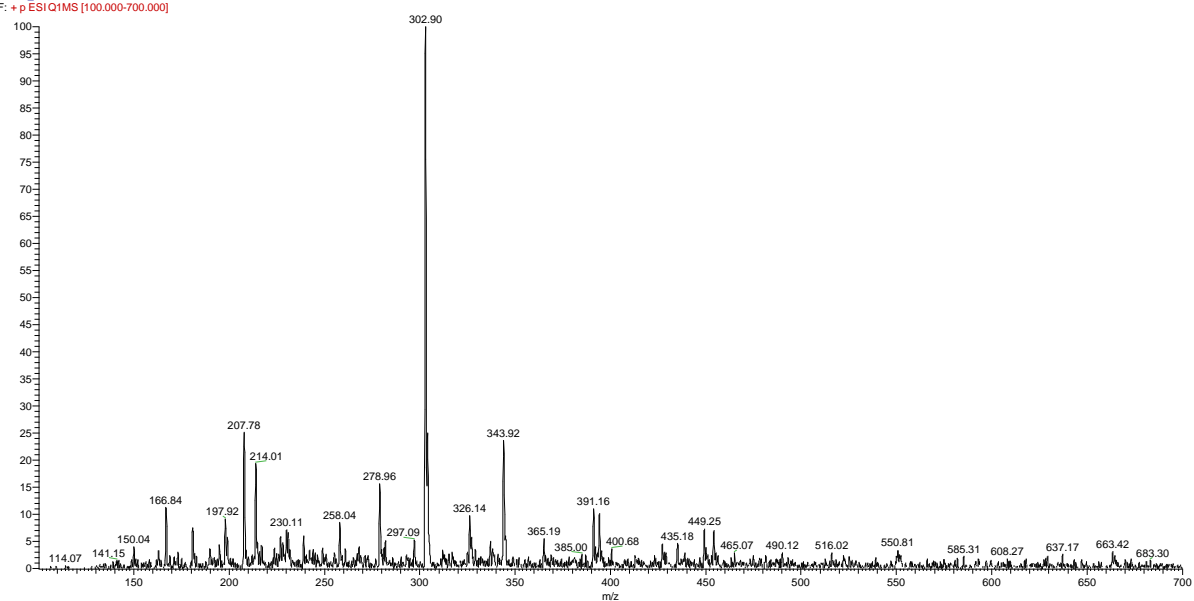

## 30b

52289 #7-9 RT: 0.11-0.15 AV: 3 SM: 9G NL: 1.21E6  
F: +p ESI Q1 MS [100.000-700.000]

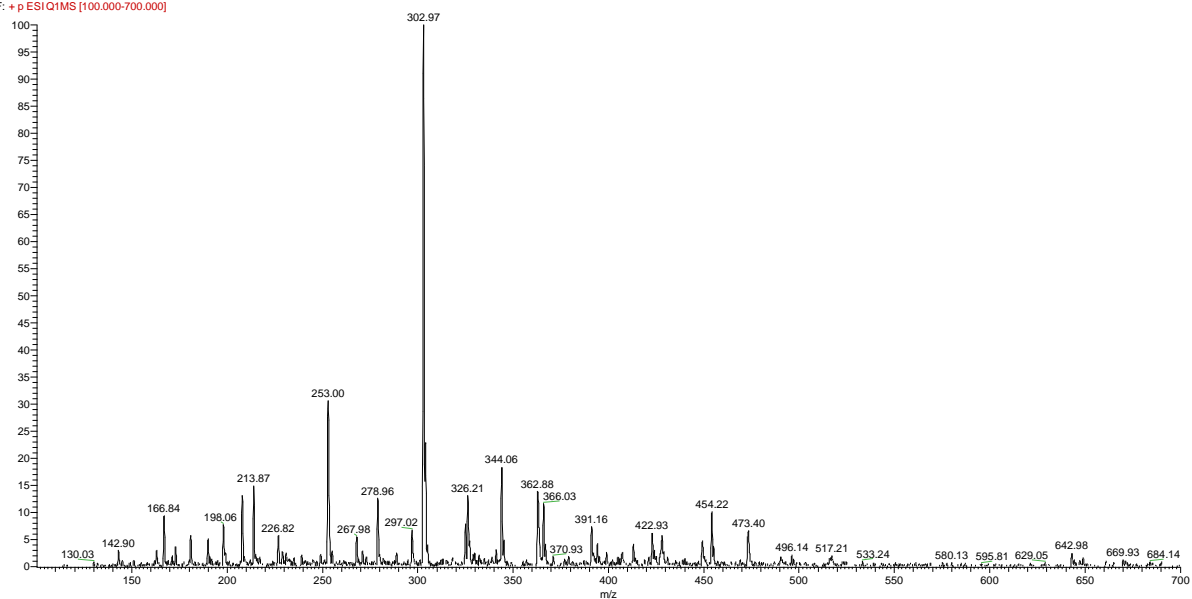

## 35

52299 #4 RT: 0.06 AV: 1 SM: 9G NL: 3.12E6  
F: +p ESI Q1 MS [100.000-700.000]

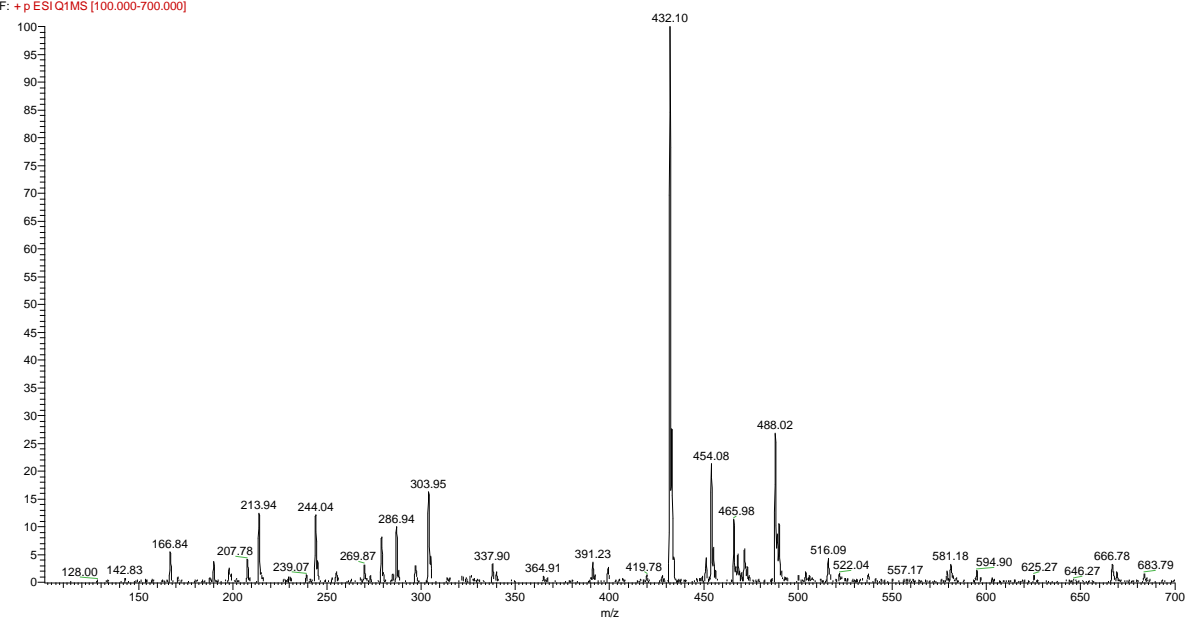

## 42a

52300 #8 RT: 0.13 AV: 1 SM: 9G NL: 6.86E5  
F: +p ESIQ1MS [100.000-700.000]

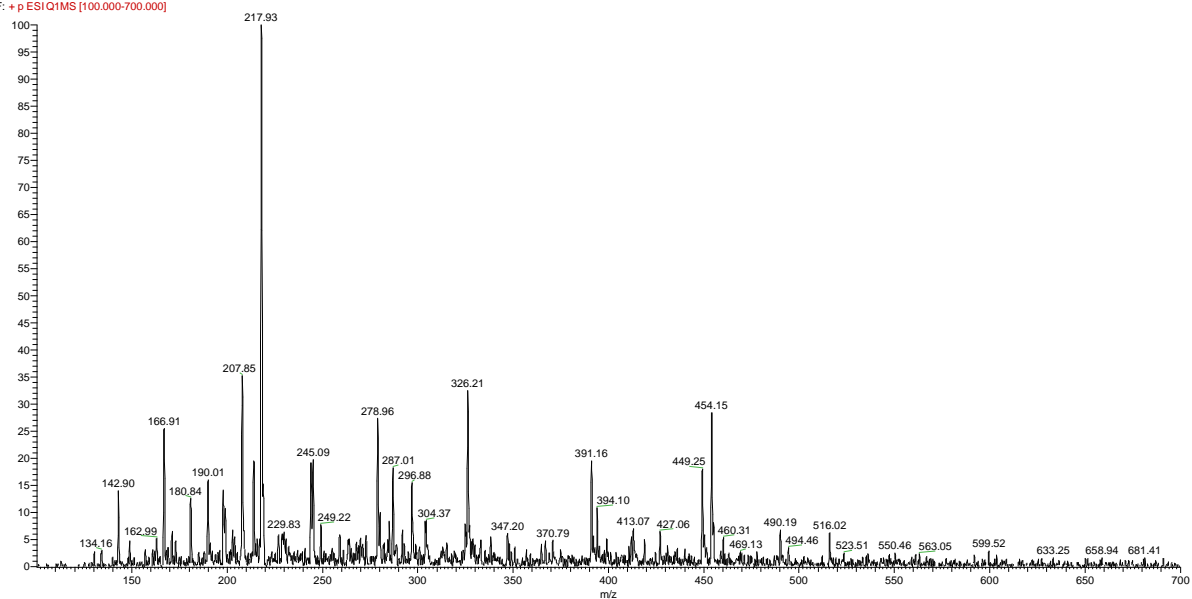

## 51

52301 #9 RT: 0.15 AV: 1 SM: 9G NL: 7.71E6  
F: +p ESIQ1MS [100.000-700.000]

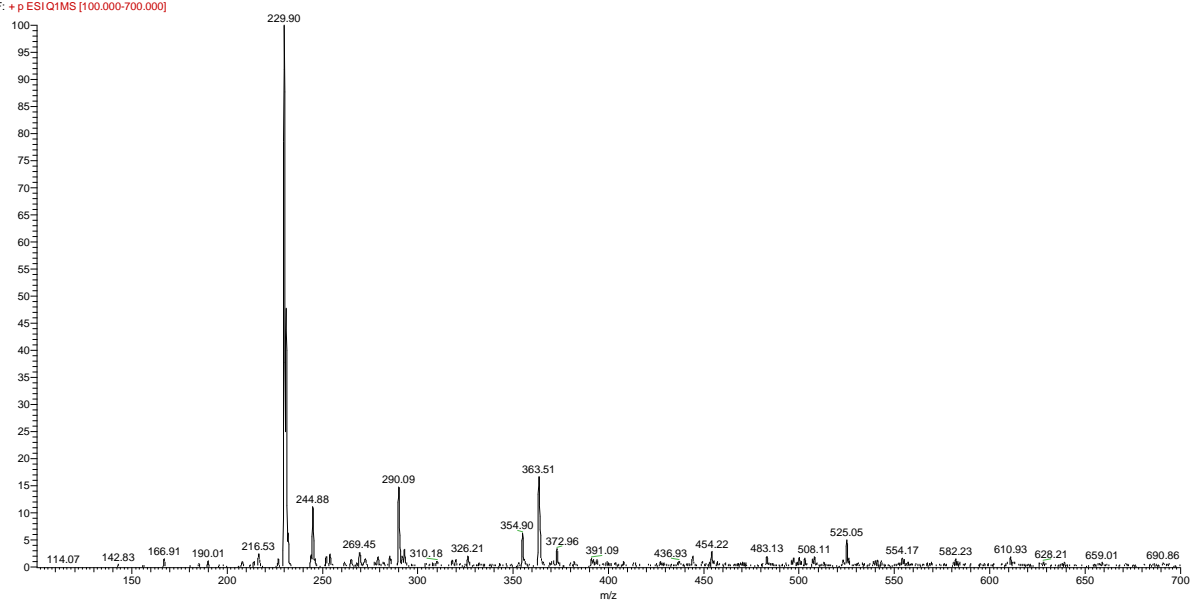

54

52302 #8-8 RT: 0.13-0.15 AV: 2 SM: 9G NL: 7.57E6  
F: +pESI/Q1MS [100.000-700.000]

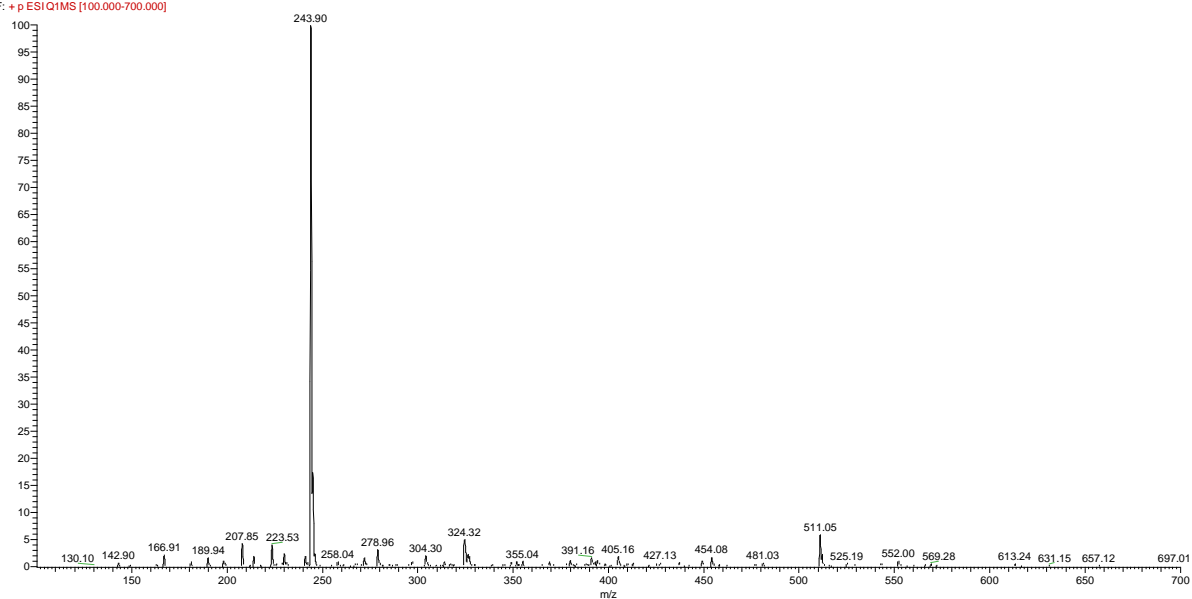

55

52303 #10 RT: 0.16 AV: 1 SM: 9G NL: 1.41E6  
F: +pESI/Q1MS [100.000-700.000]

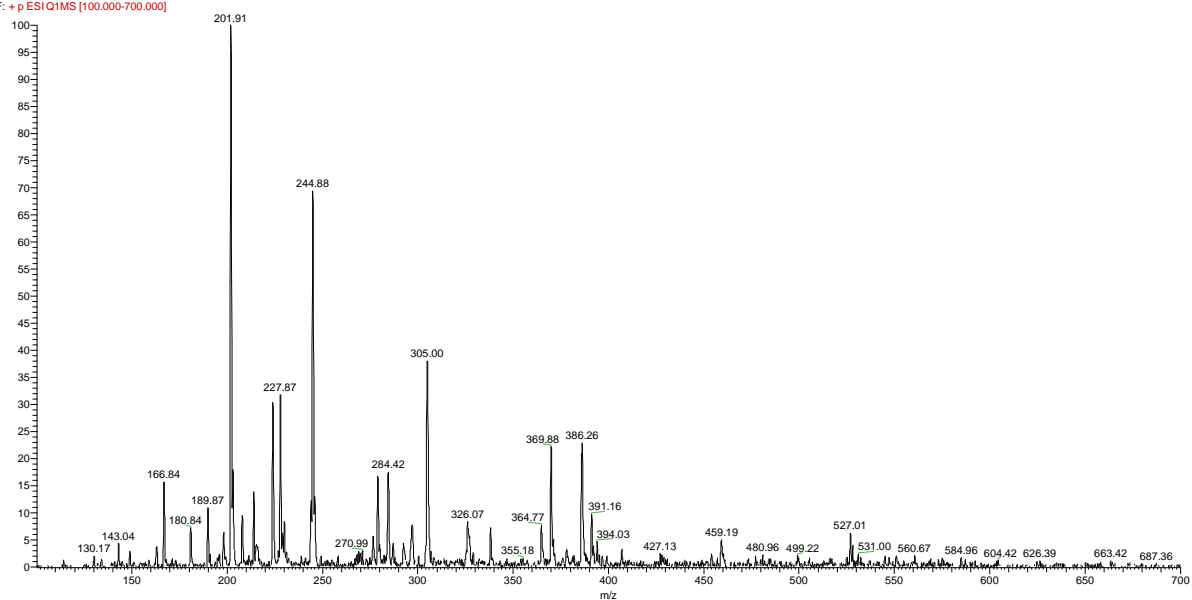

57

52287 #7-10 RT: 0.11-0.16 AV: 4 SM: 9G NL: 3.66E7  
F: +P ESI/Q1MS [100.000-700.000]

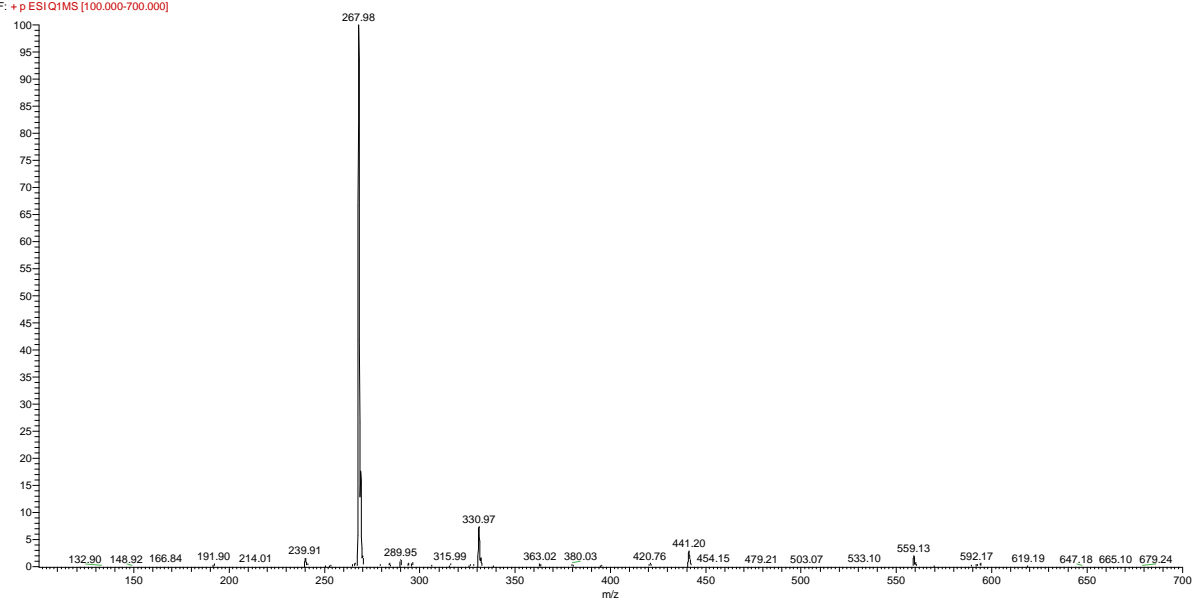

## HPLC chromatograms

4a

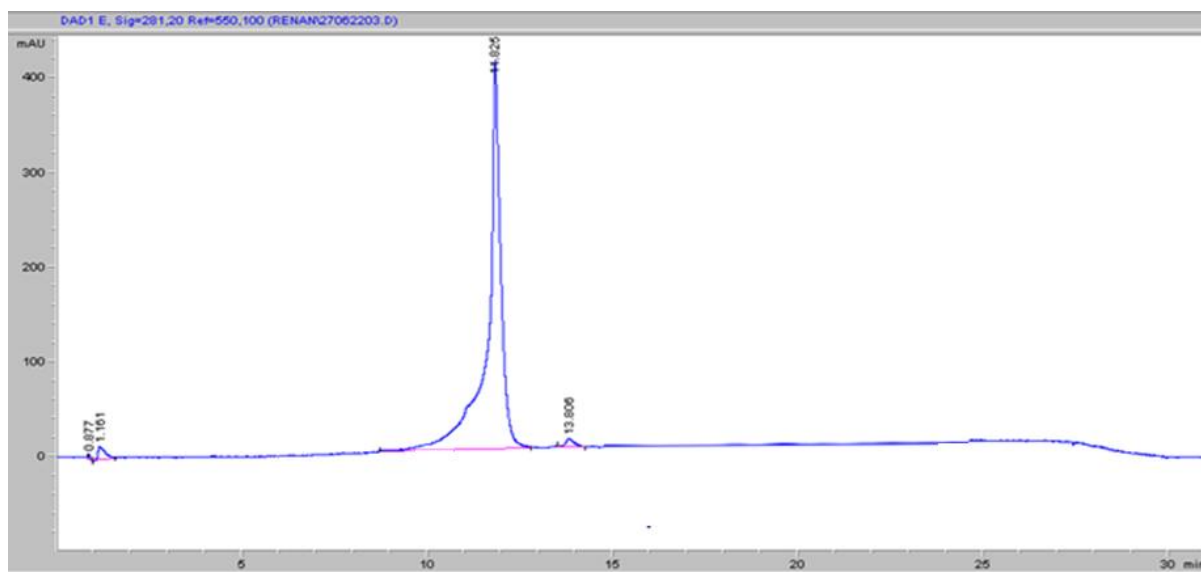

4b

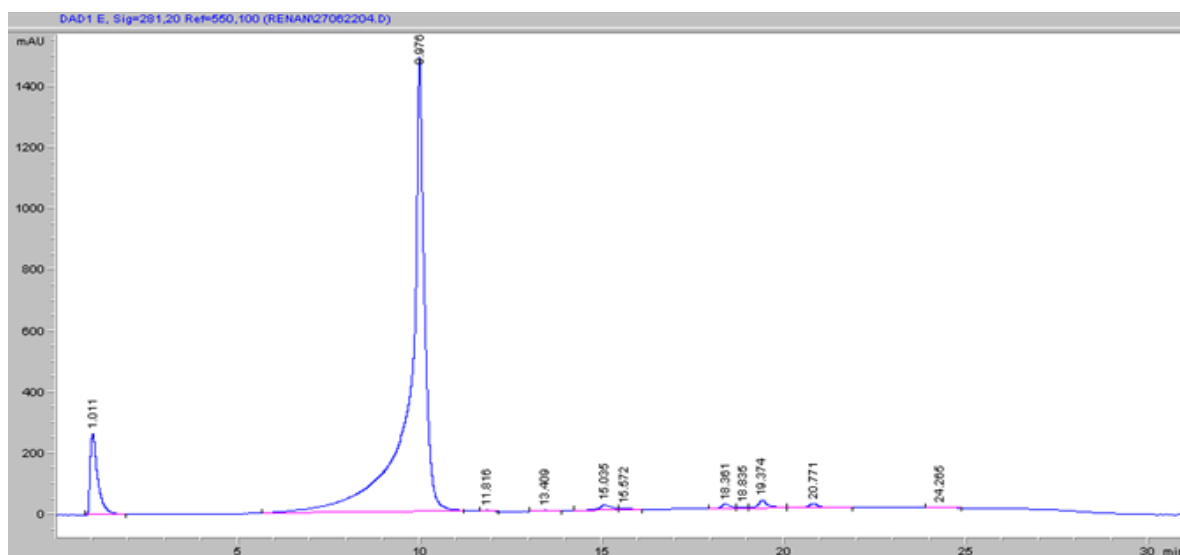

1.011 DMSO peak



6

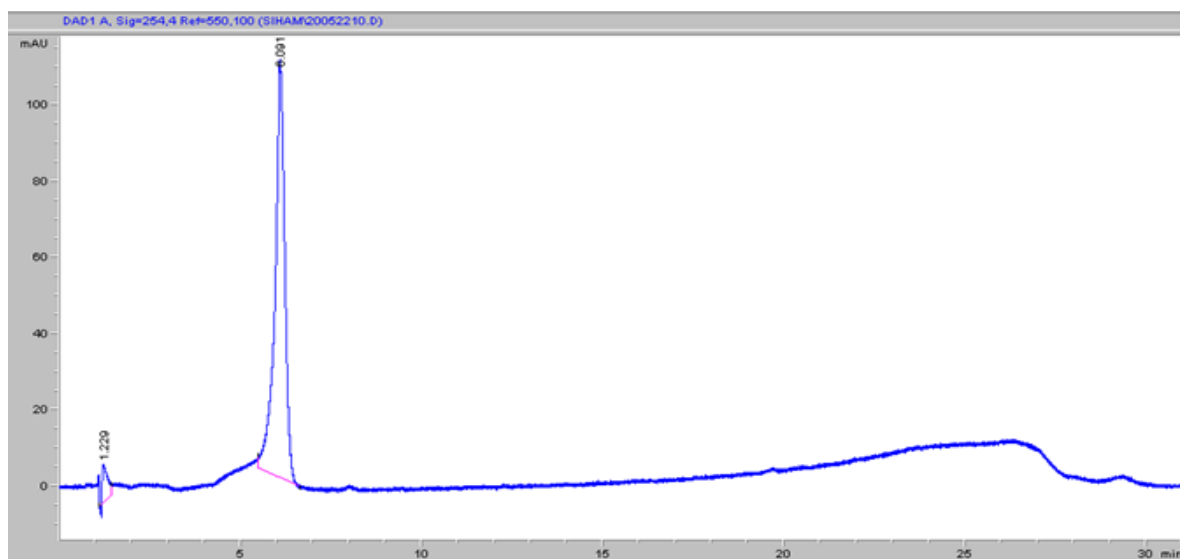

7

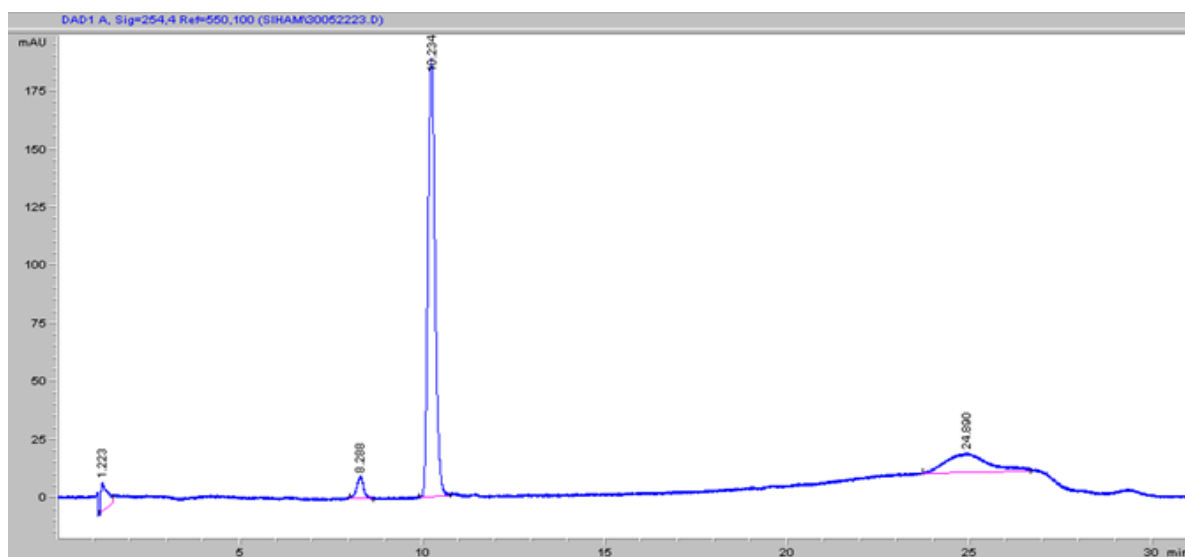

16

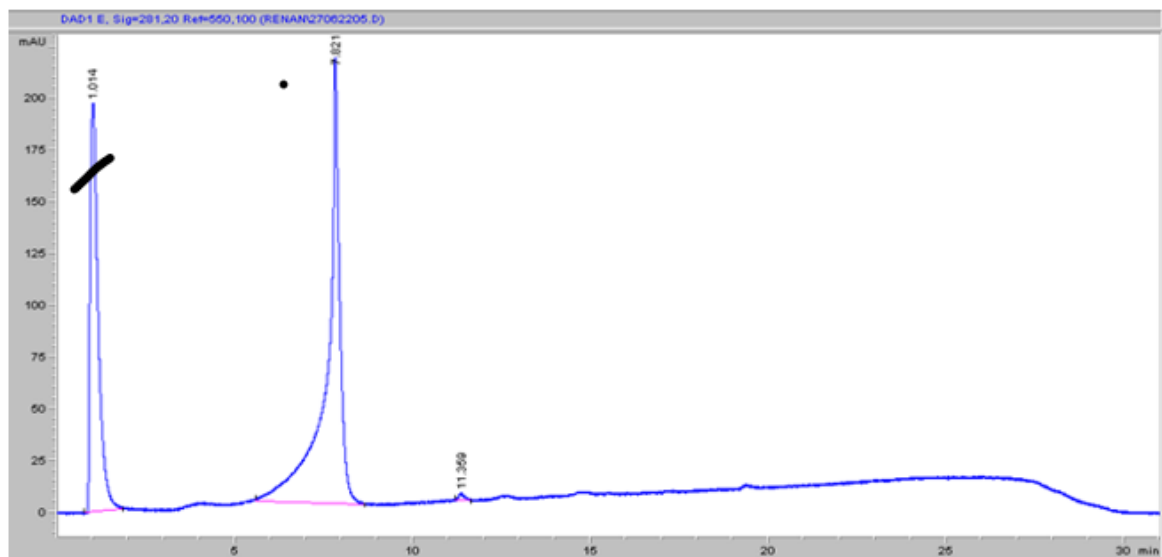

1.014 DMSO peak

17

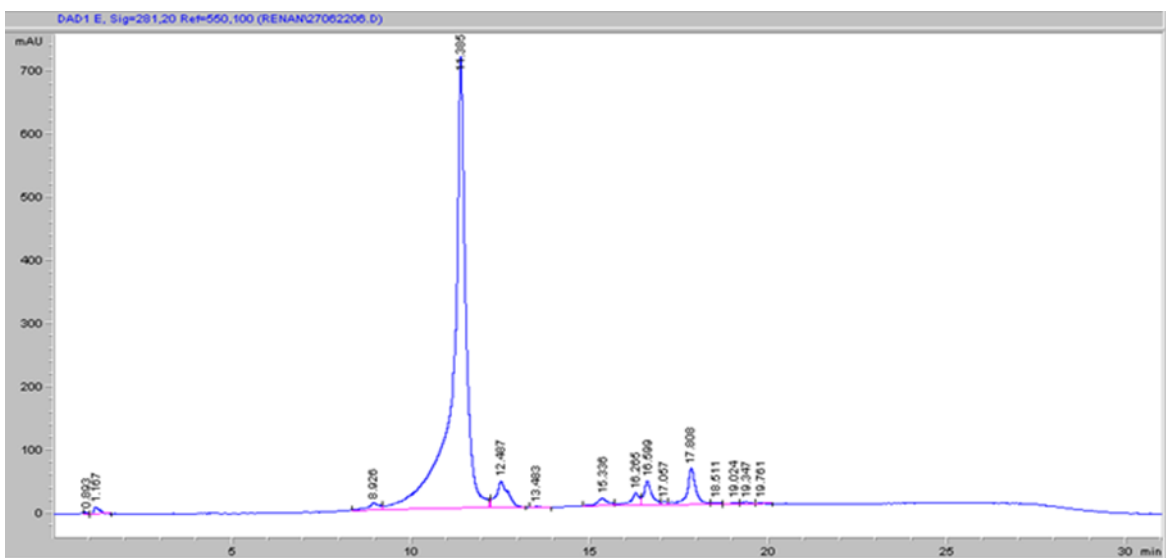

22

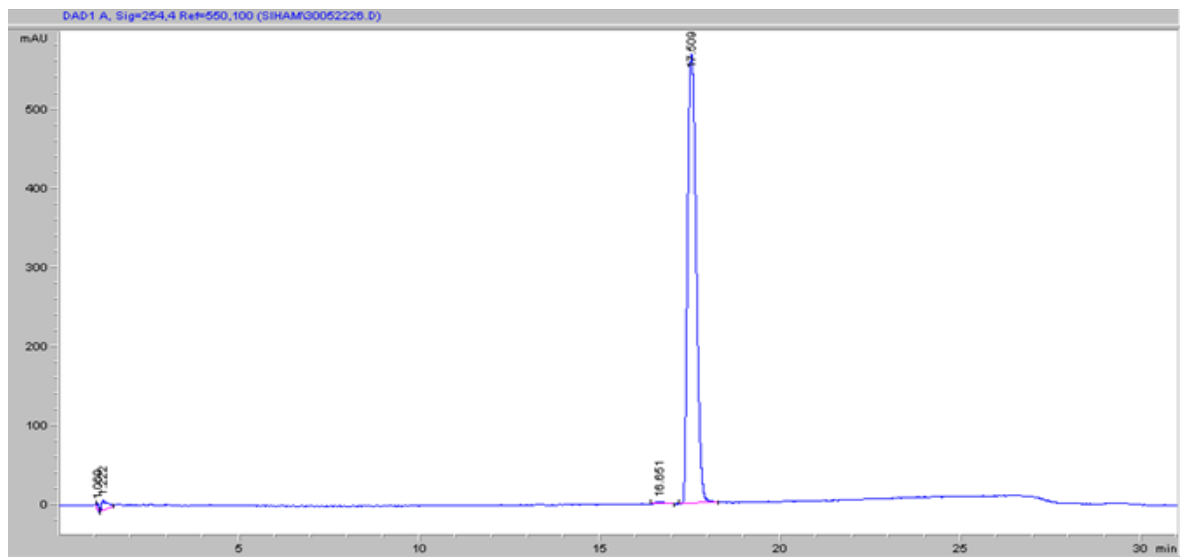

27

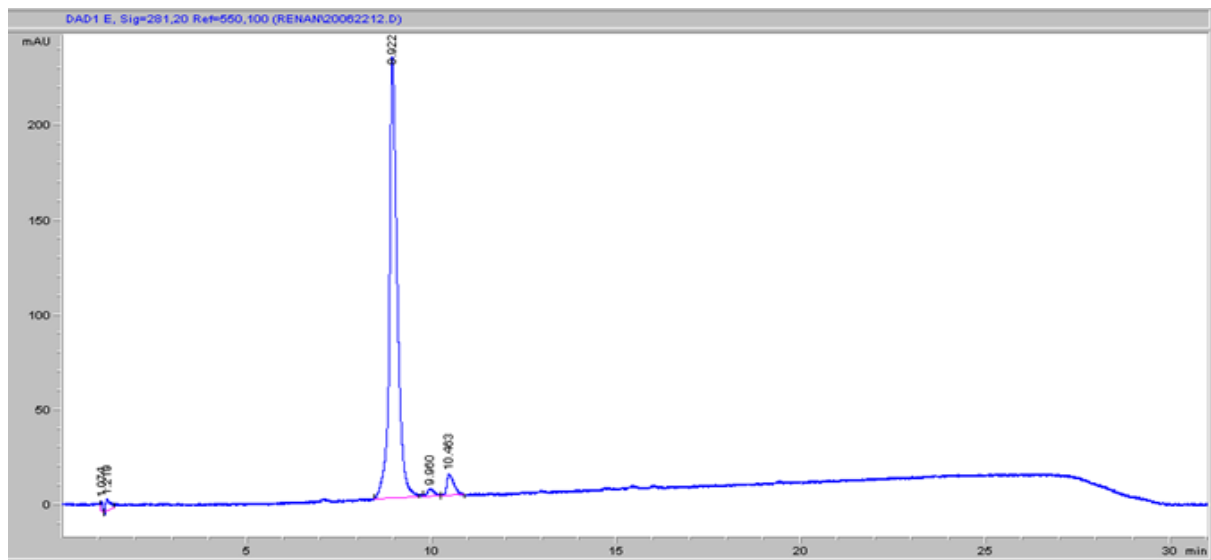

28

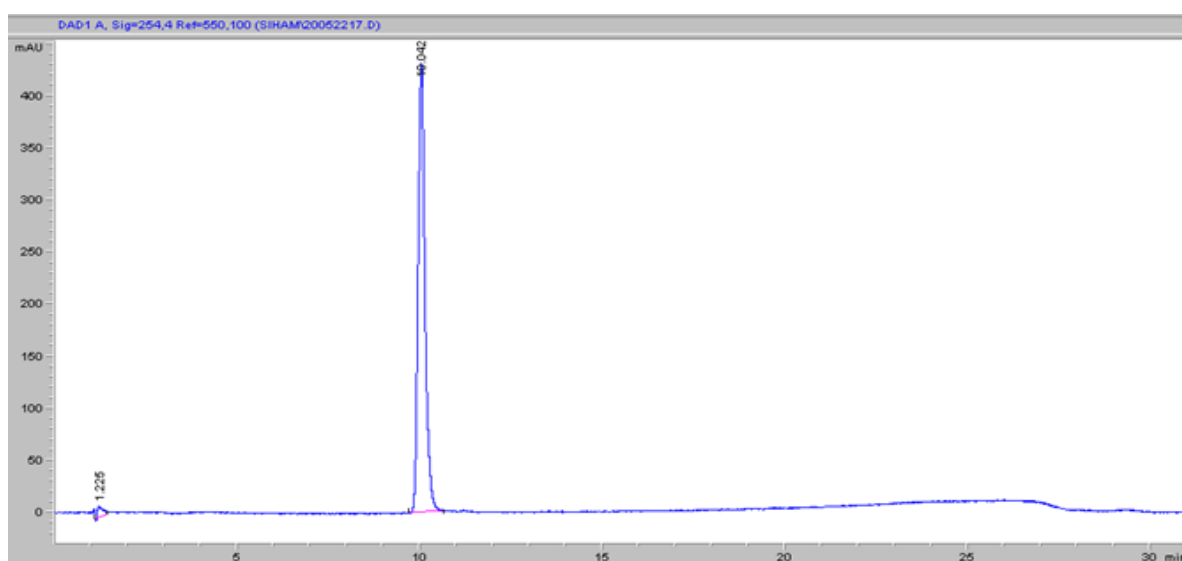

29a

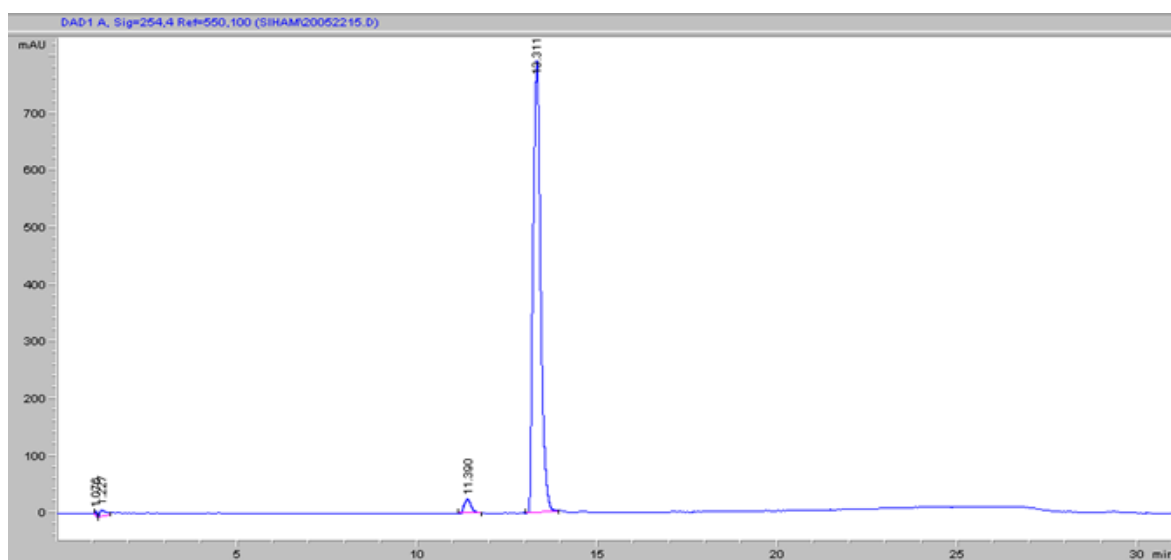

29b

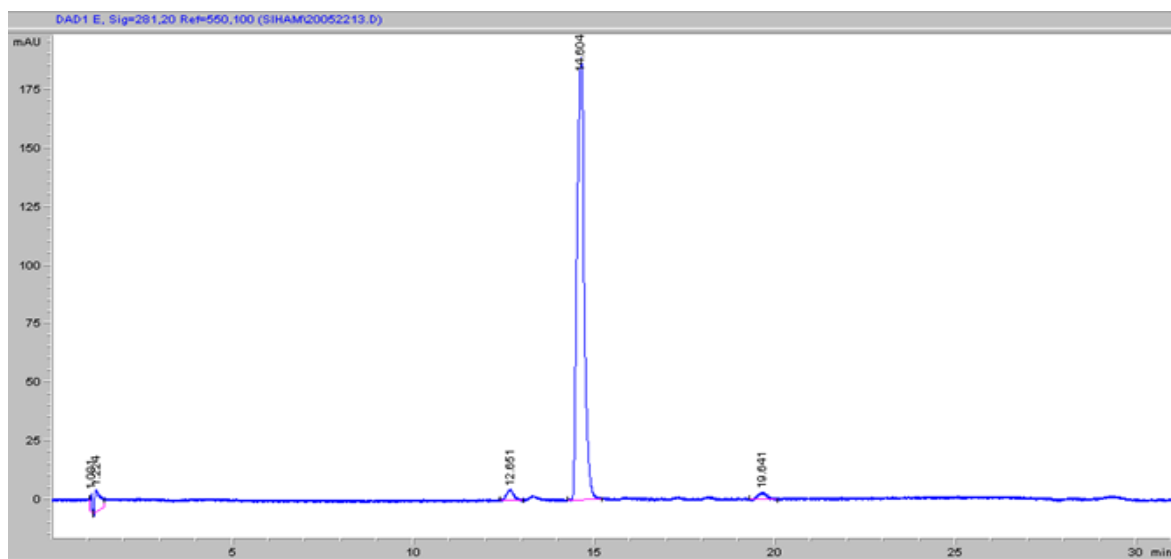

29c

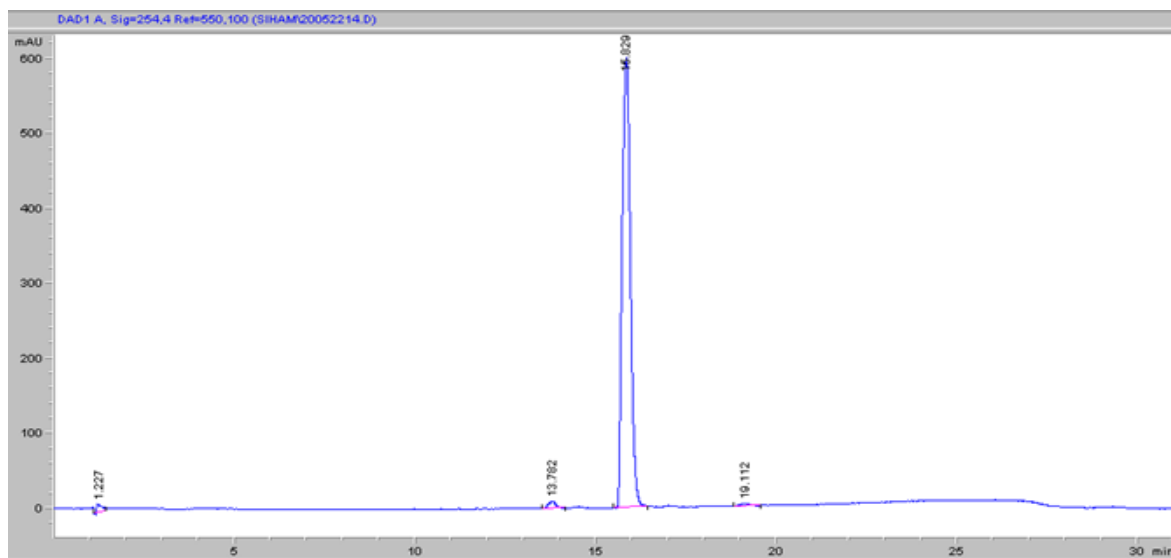

30b

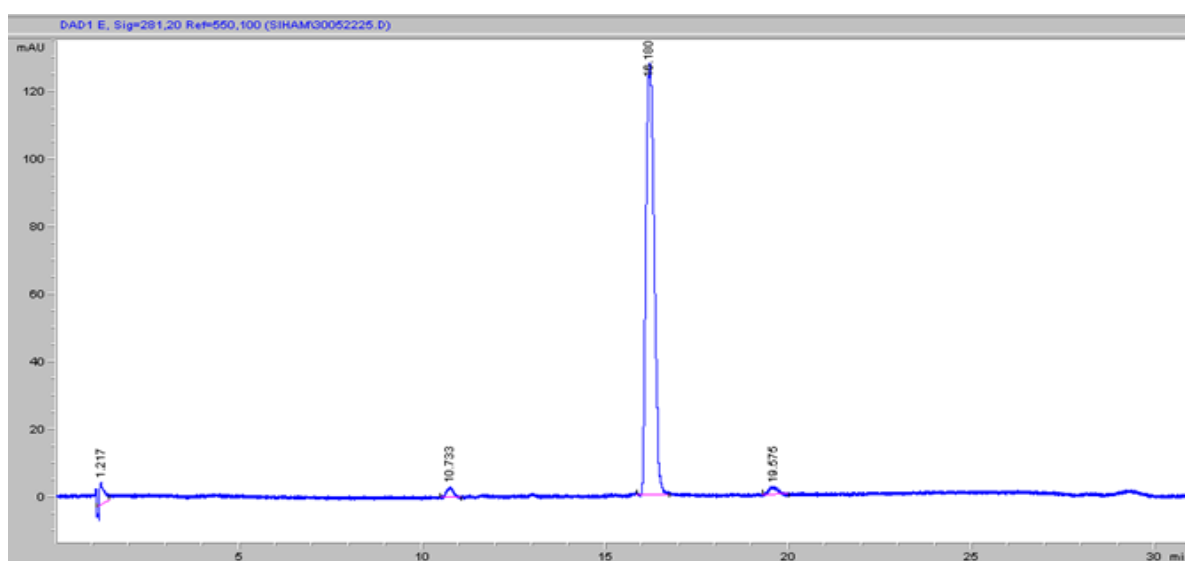

35

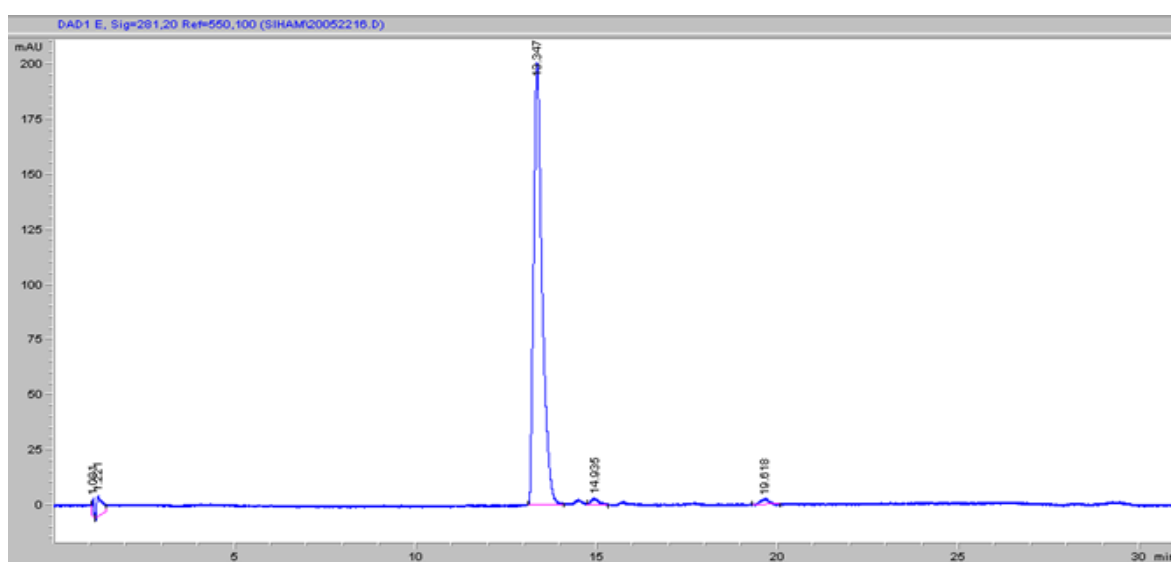

42a

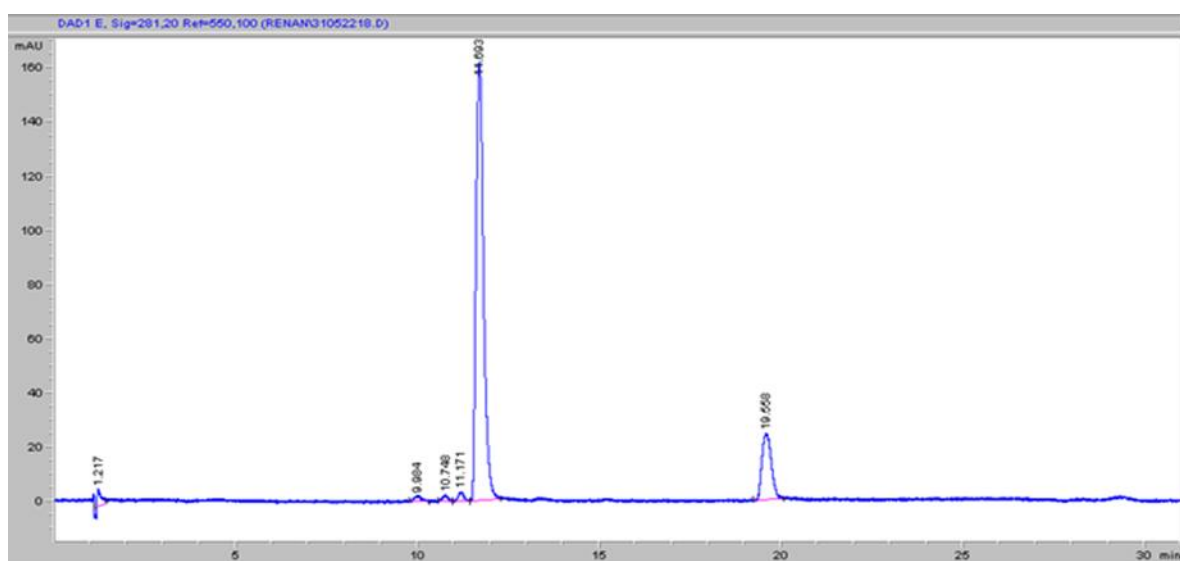

51

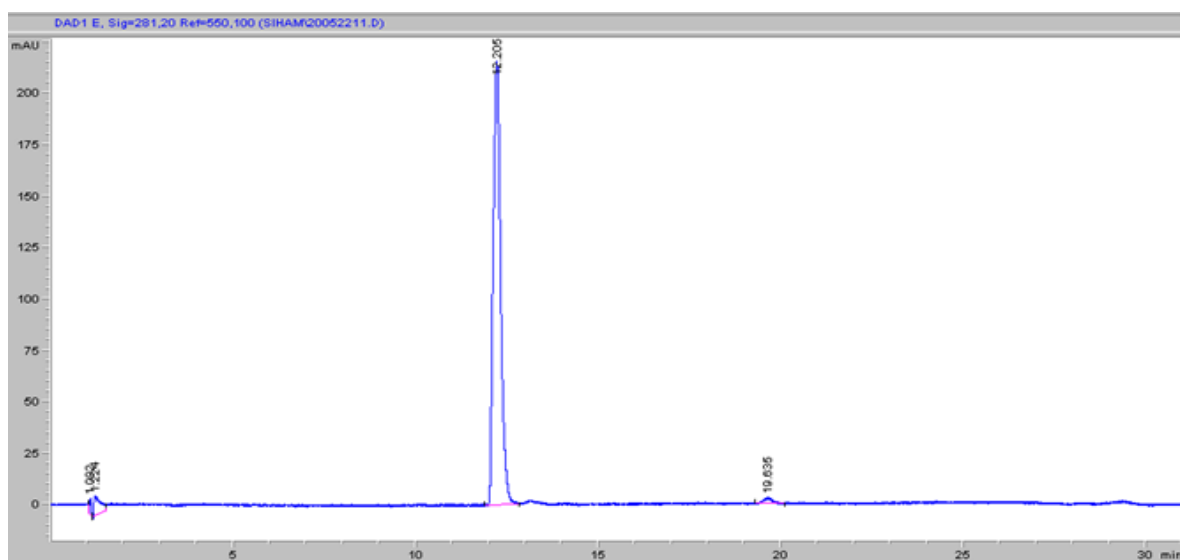

54

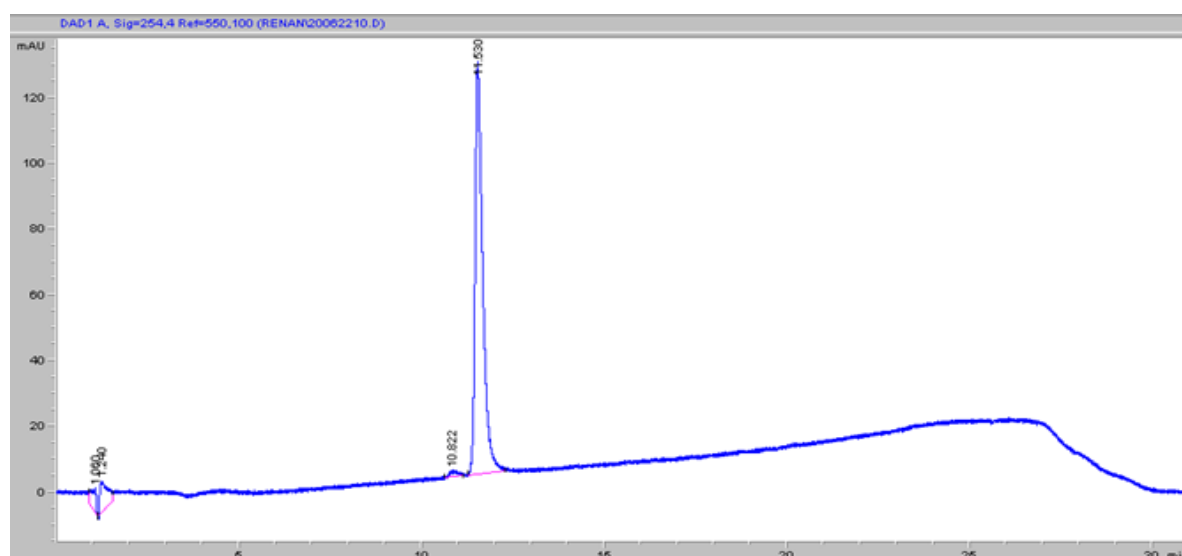

55

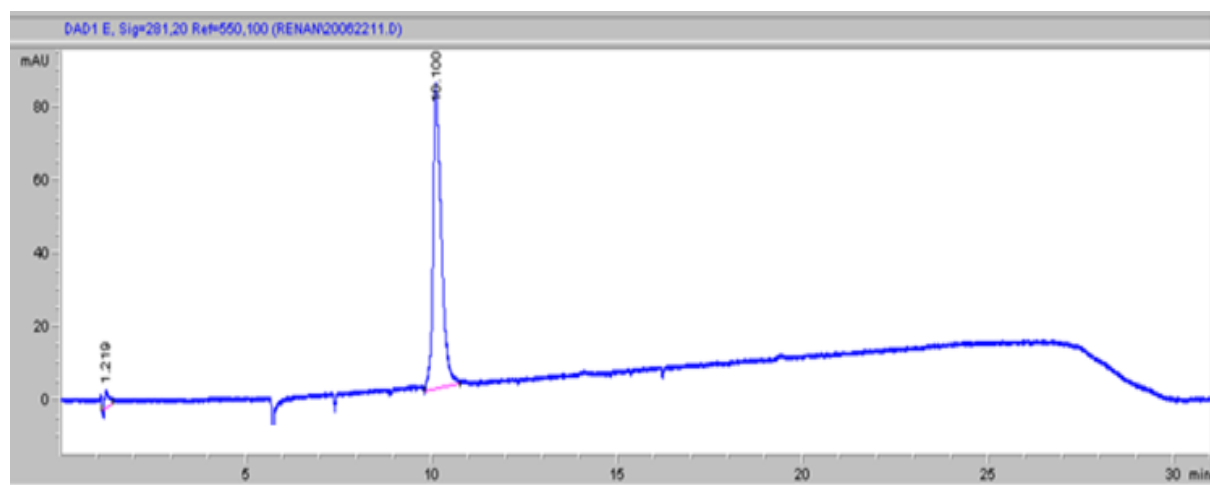



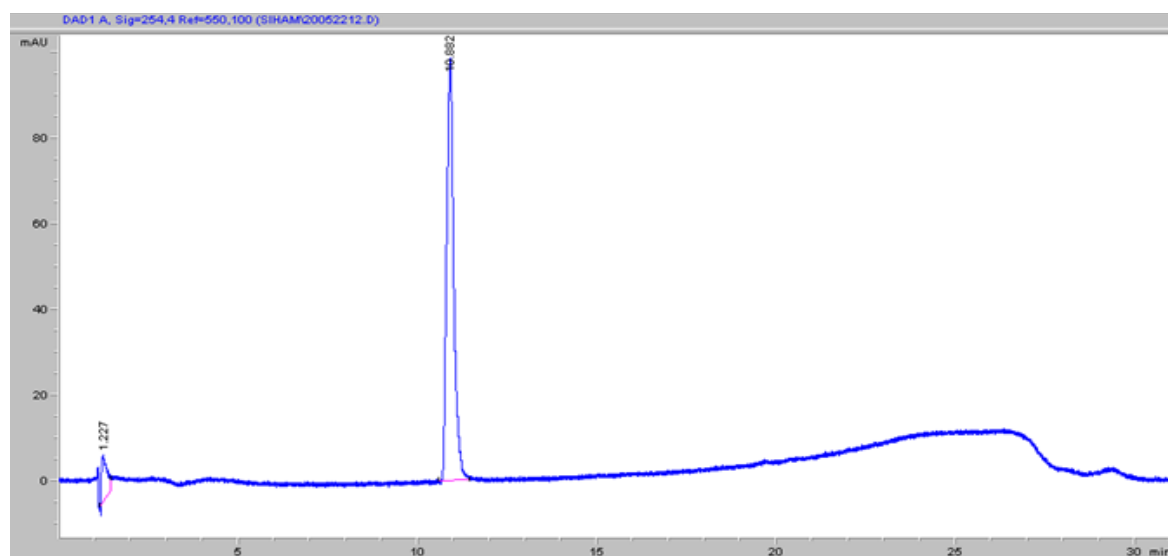

**Table S1.** 50 best compounds generated with scaffold hopping replacement.

| Rank | Structure                                                 | Score | Field Score | Shape Score |
|------|-----------------------------------------------------------|-------|-------------|-------------|
| 1    | <chem>CN1N=C(C)C(SCC(N2CCCCC2)=O)CC1=O</chem>             | 0.881 | 0.837       | 0.925       |
| 2    | <chem>FC(F)(F)c1cccc(SCC(=O)N2CCCCC2)c1</chem>            | 0.869 | 0.807       | 0.93        |
| 3    | <chem>Clc1cccc(SCC(=O)N2CCCCC2)c1</chem>                  | 0.861 | 0.792       | 0.931       |
| 4    | <chem>Clc1ccc(S(=O)(=O)CC(=O)N2CCCCC2)cc1C(F)(F)F</chem>  | 0.853 | 0.813       | 0.893       |
| 5    | <chem>Fc1ccc(N)c(SCC(=O)N2CCCCC2)c1</chem>                | 0.85  | 0.81        | 0.889       |
| 6    | <chem>Fc1cccc(SCC(=O)N2CCCCC2)c1</chem>                   | 0.849 | 0.787       | 0.912       |
| 7    | <chem>Fc1cc(N)cc(SCC(=O)N2CCCCC2)c1</chem>                | 0.848 | 0.775       | 0.922       |
| 8    | <chem>FC(F)(F)c1ccnc(SCC(=O)N2CCCCC2)n1</chem>            | 0.847 | 0.82        | 0.875       |
| 9    | <chem>FC(F)(F)c1ccnc(S(=O)(=O)CC(=O)N2CCCCC2)c1</chem>    | 0.846 | 0.782       | 0.909       |
| 11   | <chem>O=C(N1CCCCC1)CC/C=C/C/CCCC</chem>                   | 0.844 | 0.811       | 0.877       |
| 10   | <chem>Brc1ccc(N)c(S(=O)(=O)CC(=O)N2CCCCC2)c1</chem>       | 0.844 | 0.806       | 0.882       |
| 12   | <chem>O=S(=O)(CC(=O)N1CCCCC1)c2cccc3c2ncs3</chem>         | 0.836 | 0.773       | 0.899       |
| 13   | <chem>FC(F)(F)c1ccc(c(S(=O)(=O)CC(=O)N2CCCCC2)c1)C</chem> | 0.832 | 0.785       | 0.879       |
| 14   | <chem>Clc1ccc(N)c(S(=O)(=O)CC(=O)N2CCCCC2)c1</chem>       | 0.83  | 0.779       | 0.88        |
| 15   | <chem>O=S(=O)(CC(=O)N1CCCCC1)c2cccc(N(C)C)c2</chem>       | 0.829 | 0.766       | 0.892       |
| 17   | <chem>O=S(=O)(c1cc(C(C)(C)C)ccc1C)CC(=O)N2CCCCC2</chem>   | 0.826 | 0.783       | 0.869       |
| 18   | <chem>Fc1ccc(SCC(=O)N2CCCCC2)cc1F</chem>                  | 0.826 | 0.761       | 0.89        |
| 16   | <chem>O=C(N1CCCCC1)COc2cccc(N(C)C)c2</chem>               | 0.826 | 0.758       | 0.894       |
| 19   | <chem>O=C(N1CCCCC1)CSc2cccc(N)c2</chem>                   | 0.826 | 0.755       | 0.896       |
| 20   | <chem>FC(F)(F)c1ccc(N)c(C(=O)CC(=O)N2CCCCC2)c1</chem>     | 0.825 | 0.74        | 0.911       |
| 21   | <chem>OCc1cccc(SCC(=O)N2CCCCC2)c1</chem>                  | 0.825 | 0.71        | 0.94        |
| 23   | <chem>O=C(N1CCCCC1)CC(c2nccc(n2)C)C</chem>                | 0.823 | 0.763       | 0.883       |
| 22   | <chem>FC(F)(F)c1cccc(C(O)CC(=O)N2CCCCC2)c1</chem>         | 0.823 | 0.76        | 0.886       |
| 25   | <chem>O=C(N1CCCCC1)CC(=O)c2cc(N)cc(OC)c2</chem>           | 0.821 | 0.724       | 0.918       |
| 24   | <chem>Fc1cc(cc(CCC(=O)N2CCCCC2)c1)C(F)(F)F</chem>         | 0.821 | 0.721       | 0.921       |
| 26   | <chem>O=C(N1CCCCC1)CSc2cccc(c2N)C</chem>                  | 0.82  | 0.764       | 0.875       |
| 27   | <chem>Clc1cc(nc(SCC(=O)N2CCCCC2)n1)N</chem>               | 0.818 | 0.789       | 0.847       |
| 28   | <chem>FC(F)(F)c1cc(nc(SCC(=O)N2CCCCC2)n1)C</chem>         | 0.817 | 0.726       | 0.907       |
| 29   | <chem>FC(F)(F)c1cc(C(=O)CC(=O)N2CCCCC2)ccc1C</chem>       | 0.816 | 0.749       | 0.884       |
| 30   | <chem>O=S(=O)(N1CCCCC1)NCCC(=O)N2CCCCC2</chem>            | 0.815 | 0.748       | 0.883       |
| 33   | <chem>O=S(=O)(CC(=O)N1CCCCC1)c2cccc(OC)c2</chem>          | 0.815 | 0.742       | 0.888       |
| 31   | <chem>O=C(N1CCCCC1)CC(=O)c2cccc(OC)n2</chem>              | 0.815 | 0.736       | 0.895       |
| 32   | <chem>FC(F)(F)c1ccc(F)c(C(=O)CC(=O)N2CCCCC2)c1</chem>     | 0.815 | 0.733       | 0.898       |
| 34   | <chem>O=C(N1CCCCC1)CCCc2c(oc(n2)C)C</chem>                | 0.814 | 0.74        | 0.888       |
| 36   | <chem>Clc1cccc(S(=O)(=O)CC(=O)N2CCCCC2)c1</chem>          | 0.813 | 0.771       | 0.855       |
| 35   | <chem>O=C(N1CCCCC1)CC[NH2+]CCCSC</chem>                   | 0.813 | 0.761       | 0.866       |
| 37   | <chem>O=C(N1CCCCC1)CCCNc2cccc[nH+]2</chem>                | 0.813 | 0.747       | 0.878       |
| 38   | <chem>Fc1cc(N)cc(CCC(=O)N2CCCCC2)c1</chem>                | 0.812 | 0.727       | 0.897       |
| 39   | <chem>O=C(N1CCCCC1)CC(=O)c2cncc(OC)n2</chem>              | 0.812 | 0.721       | 0.902       |
| 43   | <chem>O=C(N1CCCCC1)CSc2nc(OC)cc(OC)n2</chem>              | 0.811 | 0.745       | 0.876       |
| 42   | <chem>O=C(N1CCCCC1)CSc2ccc3CCCc3c2</chem>                 | 0.811 | 0.74        | 0.882       |
| 40   | <chem>O=C(N1CCCCC1)CCSc2nccc(n2)C</chem>                  | 0.811 | 0.733       | 0.889       |
| 41   | <chem>O=C(N1CCCCC1)CCCc2cccc(n2)C</chem>                  | 0.811 | 0.732       | 0.889       |
| 44   | <chem>O=C(N1CCCCC1)CCCc2nc(cc(n2)C)C</chem>               | 0.809 | 0.737       | 0.88        |

|    |                                                          |       |       |       |
|----|----------------------------------------------------------|-------|-------|-------|
| 45 | <chem>O=C(N1CCCCC1)COc2cccc(c2)C=O</chem>                | 0.809 | 0.728 | 0.889 |
| 46 | <chem>FC(F)(F)c1cc(S(=O))(=O)CC(=O)N2CCCCC2)ccc1C</chem> | 0.808 | 0.749 | 0.866 |
| 48 | <chem>I/C=C/CCC(=O)N1CCCCC1</chem>                       | 0.807 | 0.775 | 0.839 |
| 47 | <chem>O=C(N1CCCCC1)CSc2nsc(n2)N</chem>                   | 0.807 | 0.766 | 0.848 |
| 50 | <chem>O=C(N1CCCCC1)CSc2cnccc2</chem>                     | 0.807 | 0.736 | 0.877 |

---
